# Supplementary material for: Kinase Inhibitory Activities and Molecular Docking of a Novel Series of Anticancer Pyrazole Derivatives
Source: MDPI journal article supplement (doi:10.3390/molecules23123074), 2018-11-24

## Supplementary material

### Peak Find - Memory-162

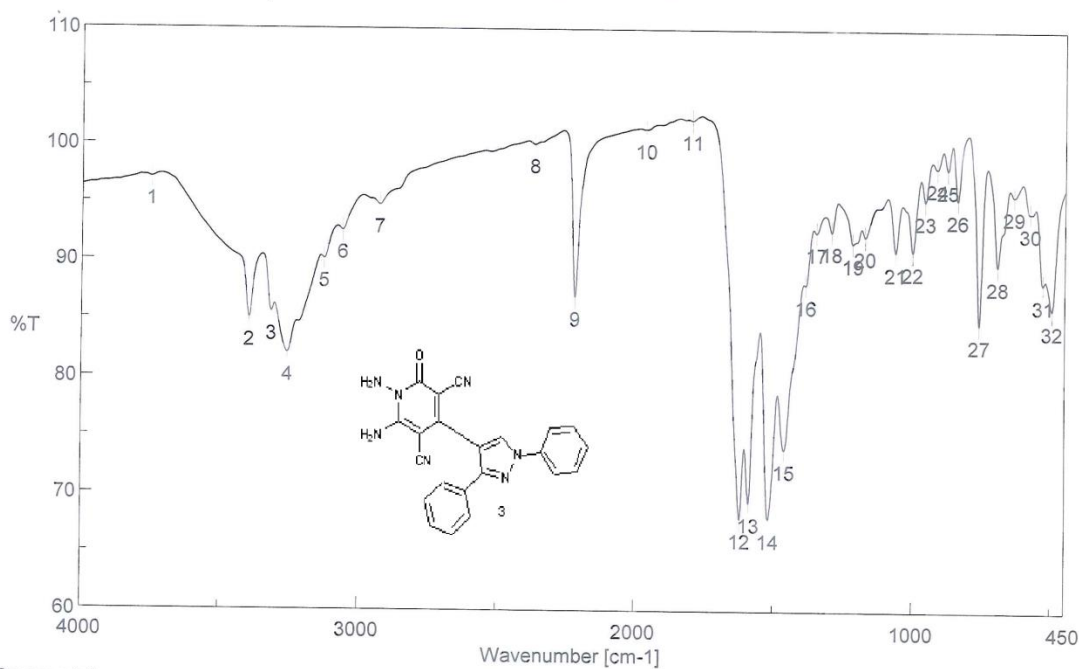

[Comments]  
 Sample name V1  
 Comment 21/4/2016  
 User IR  
 Division IR  
 Company MAC

#### [ Result of Peak Picking ]

| No. | Position | Intensity | No. | Position | Intensity | No. | Position | Intensity |
|-----|----------|-----------|-----|----------|-----------|-----|----------|-----------|
| 1   | 3747.98  | 97.0565   | 2   | 3393.14  | 84.9864   | 3   | 3315.03  | 85.5201   |
| 4   | 3256.22  | 82.0298   | 5   | 3125.08  | 90.0806   | 6   | 3058.55  | 92.54     |
| 7   | 2925.48  | 94.7572   | 8   | 2365.26  | 100.037   | 9   | 2217.74  | 86.873    |
| 10  | 1964.14  | 101.342   | 11  | 1796.37  | 102.136   | 12  | 1620.88  | 67.9284   |
| 13  | 1589.06  | 69.2981   | 14  | 1519.63  | 67.9184   | 15  | 1462.74  | 73.8798   |
| 16  | 1386.57  | 87.9578   | 17  | 1348.96  | 92.4886   | 18  | 1294.97  | 92.5656   |
| 19  | 1217.83  | 91.5481   | 20  | 1173.47  | 92.1635   | 21  | 1063.55  | 90.818    |
| 22  | 1001.84  | 90.8775   | 23  | 956.52   | 95.2485   | 24  | 914.093  | 98.0922   |
| 25  | 875.524  | 97.9658   | 26  | 838.883  | 95.3726   | 27  | 758.852  | 84.6902   |
| 28  | 693.284  | 89.6731   | 29  | 635.43   | 95.7189   | 30  | 576.612  | 94.2598   |
| 31  | 529.364  | 88.1336   | 32  | 496.58   | 85.9436   |     |          |           |

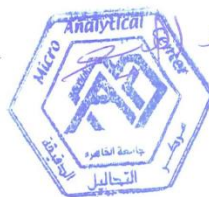

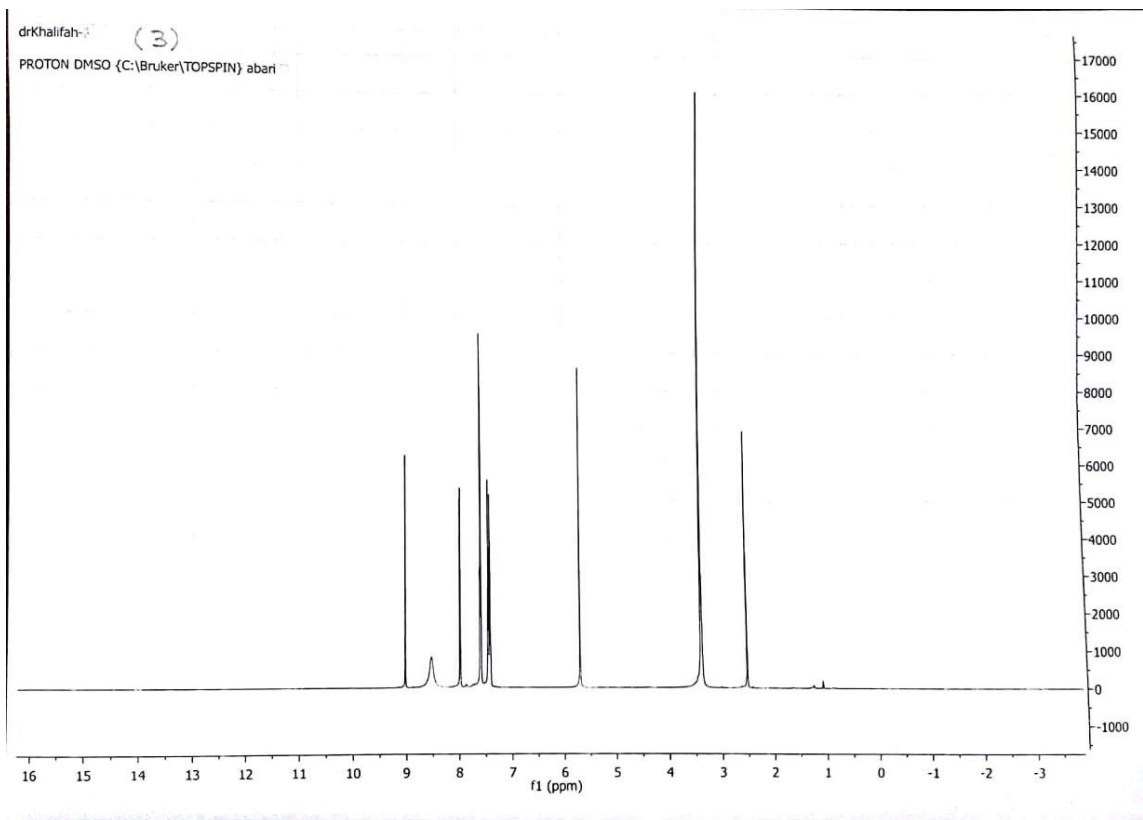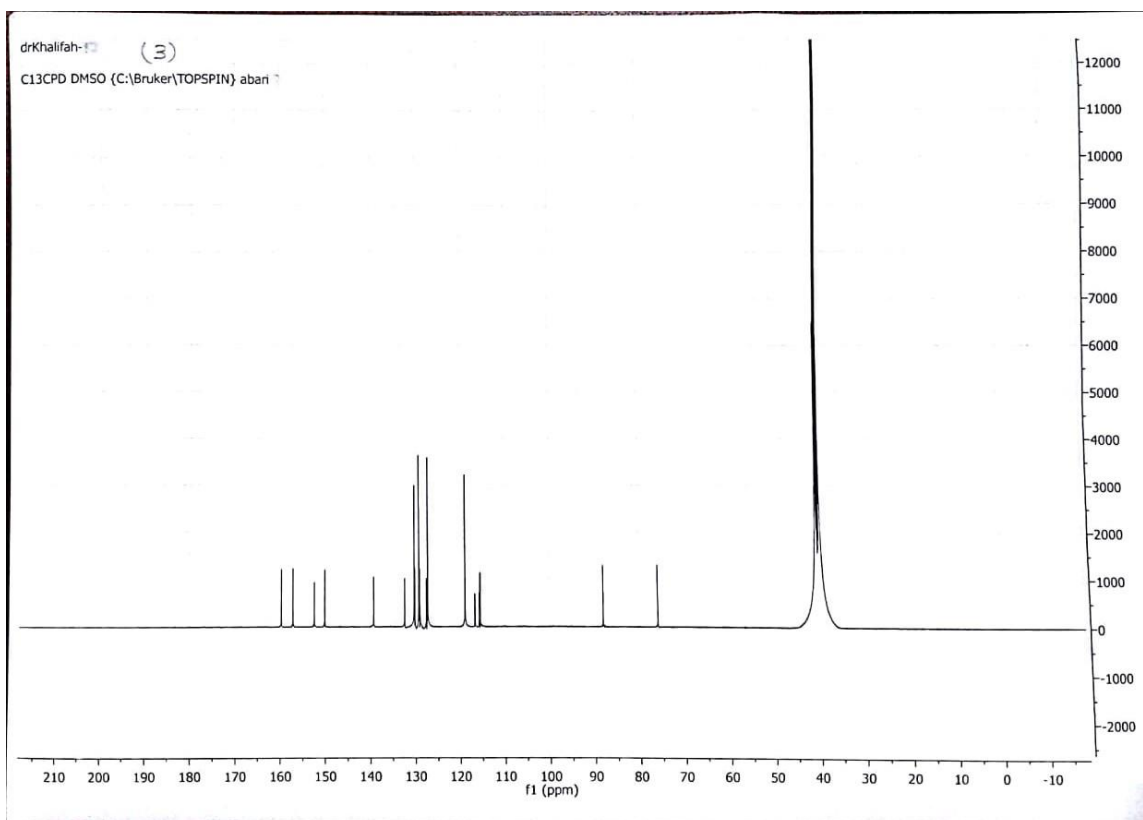

RT: 0.60 - 4.36 SM: 15B

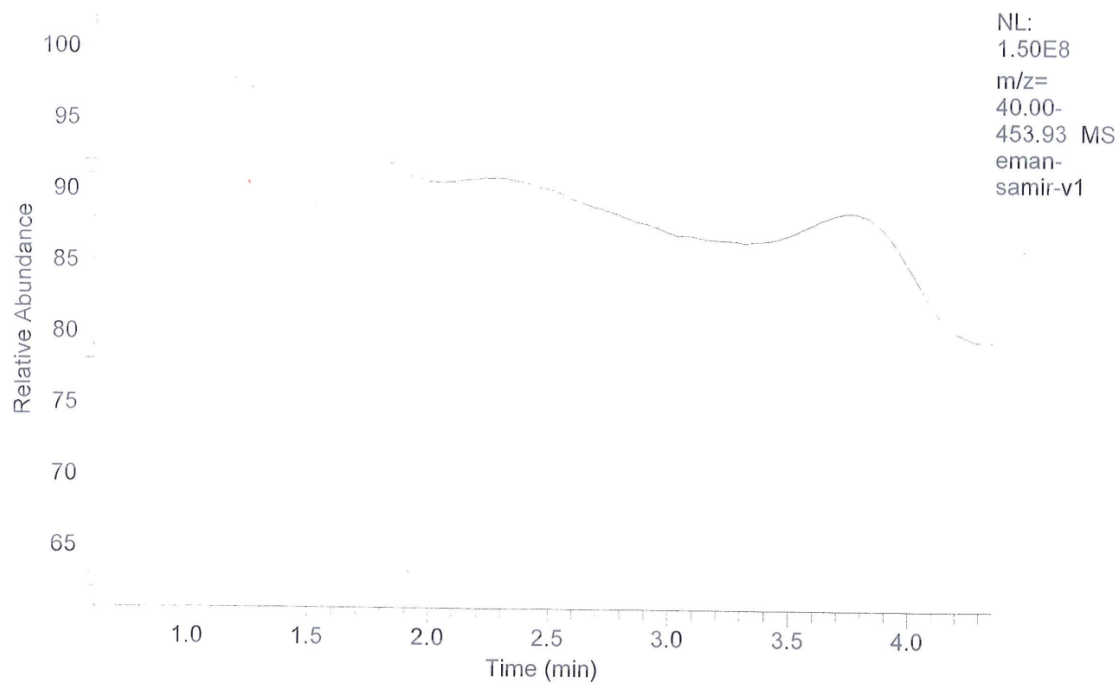

eman-samir-v1 #341 RT: 5.72 AV: 1 NL: 3.64E7  
T: {0,0} + c EI Full ms [40.00-1000.00]

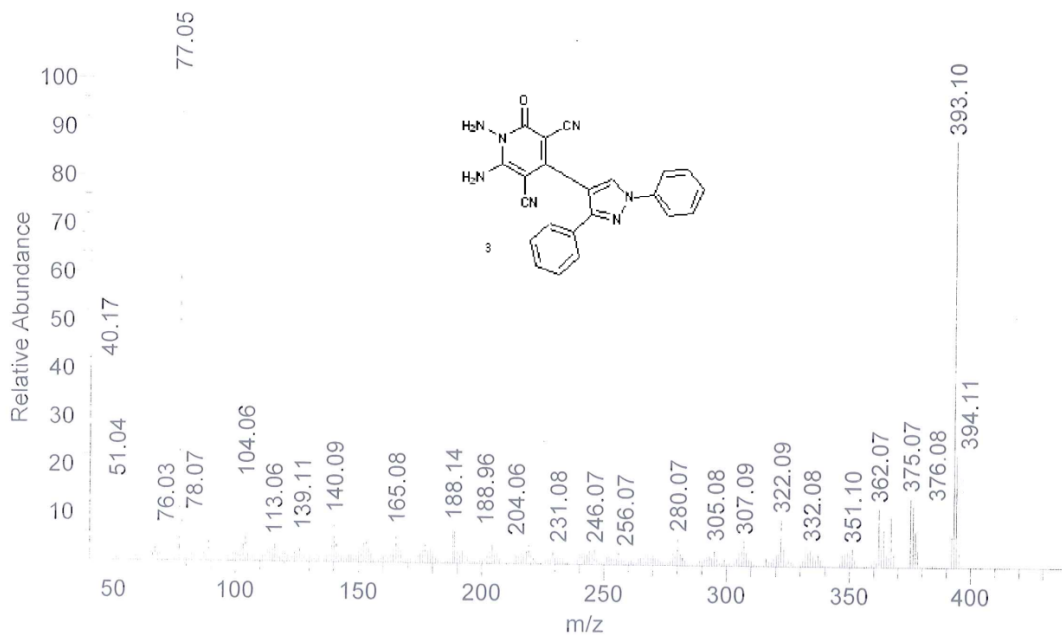

# Peak Find - Memory-86

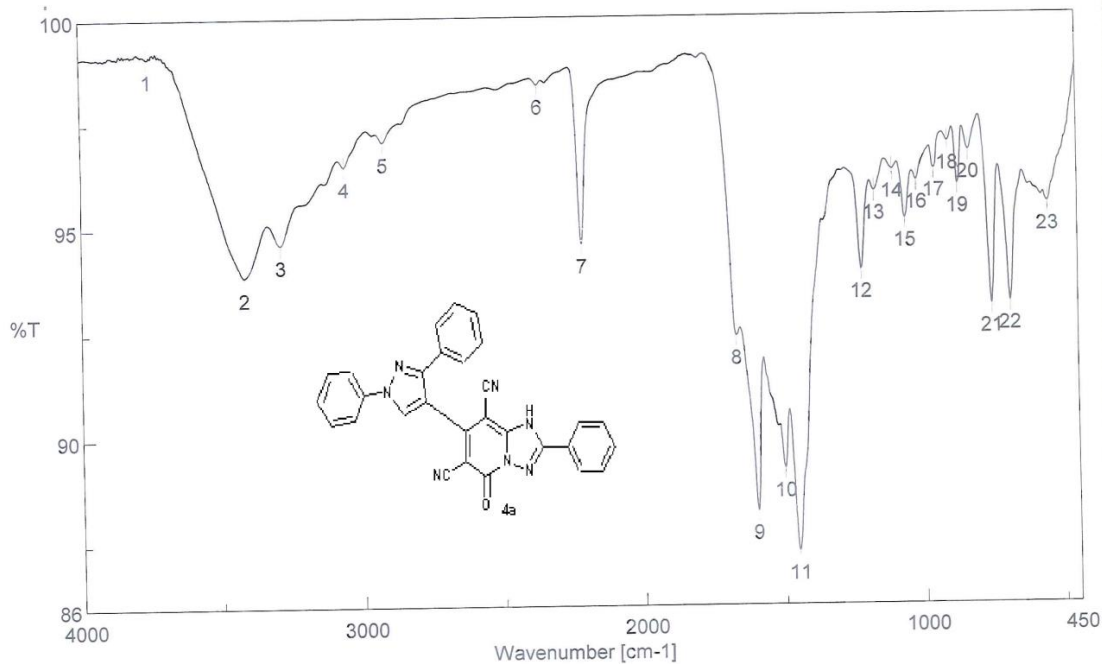

[Comments]  
Sample name V6  
Comment 21/4/2016  
User IR  
Division IR  
Company MAC

## [ Result of Peak Picking ]

| No. | Position | Intensity | No. | Position | Intensity | No. | Position | Intensity |
|-----|----------|-----------|-----|----------|-----------|-----|----------|-----------|
| 1   | 3759.55  | 99.0883   | 2   | 3420.14  | 93.8496   | 3   | 3290.93  | 94.6125   |
| 4   | 3064.33  | 96.457    | 5   | 2925.48  | 97.0357   | 6   | 2369.12  | 98.3889   |
| 7   | 2216.77  | 94.5853   | 8   | 1669.09  | 92.3884   | 9   | 1598.7   | 88.2264   |
| 10  | 1501.31  | 89.2323   | 11  | 1454.06  | 87.265    | 12  | 1222.65  | 93.926    |
| 13  | 1174.44  | 95.7825   | 14  | 1108.87  | 96.293    | 15  | 1064.51  | 95.1287   |
| 16  | 1023.05  | 96.0274   | 17  | 959.412  | 96.3077   | 18  | 910.236  | 96.9516   |
| 19  | 875.524  | 95.9337   | 20  | 835.99   | 96.7327   | 21  | 755.959  | 93.0871   |
| 22  | 690.391  | 93.1489   | 23  | 555.398  | 95.4864   |     |          |           |

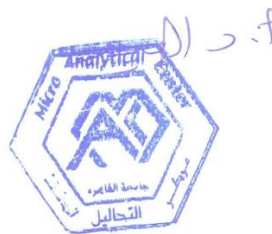

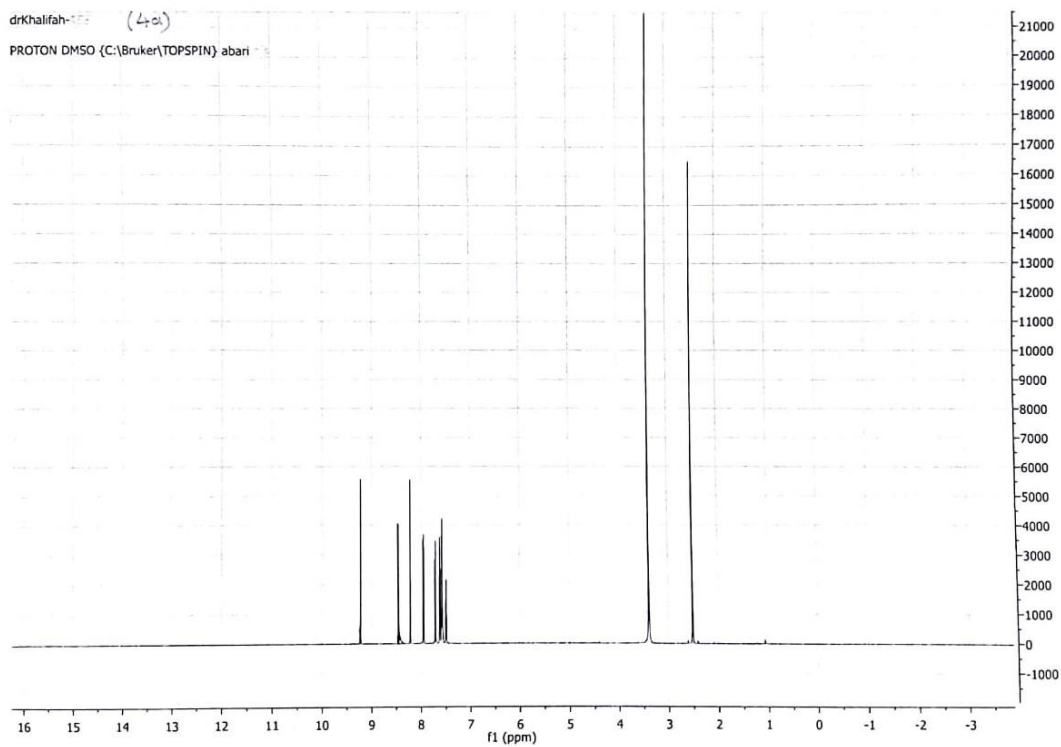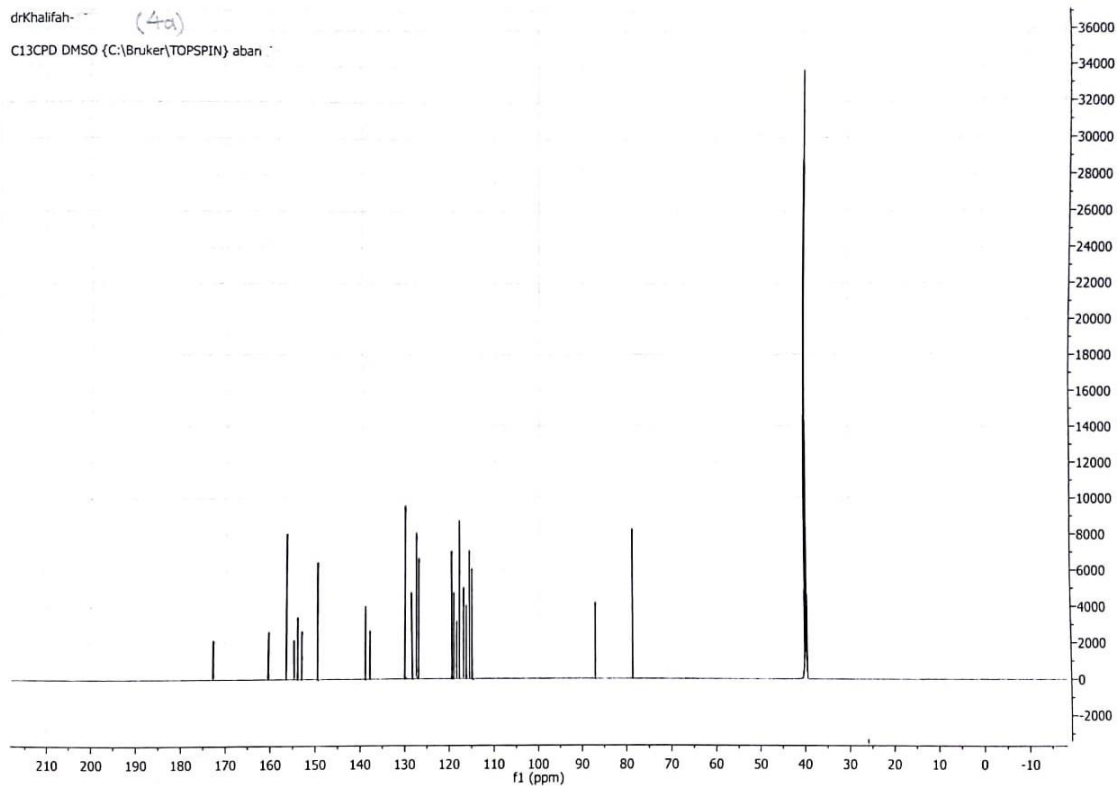

RT: 3.43 - 5.98 SM: 15B

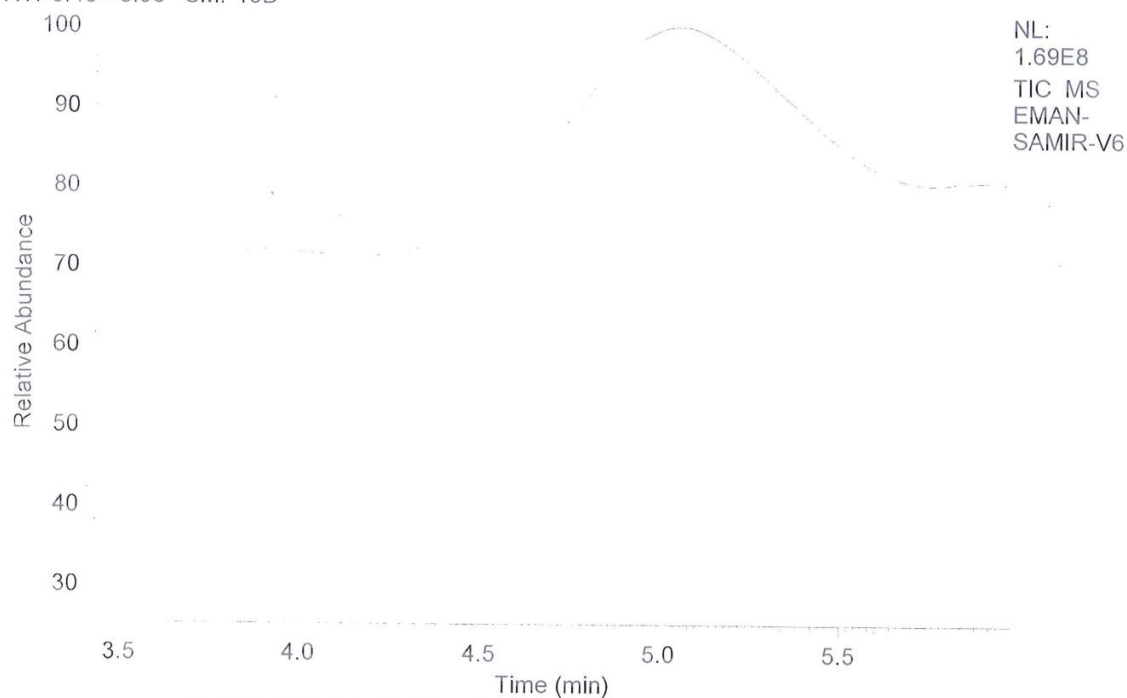

EMAN-SAMIR-V6 #336 RT: 5.64 AV: 1 SB: 10 4.15-4.28, 4.55 NL: 2.79E6  
T: {0,0} + c EI Full ms [40.00-1000.00]

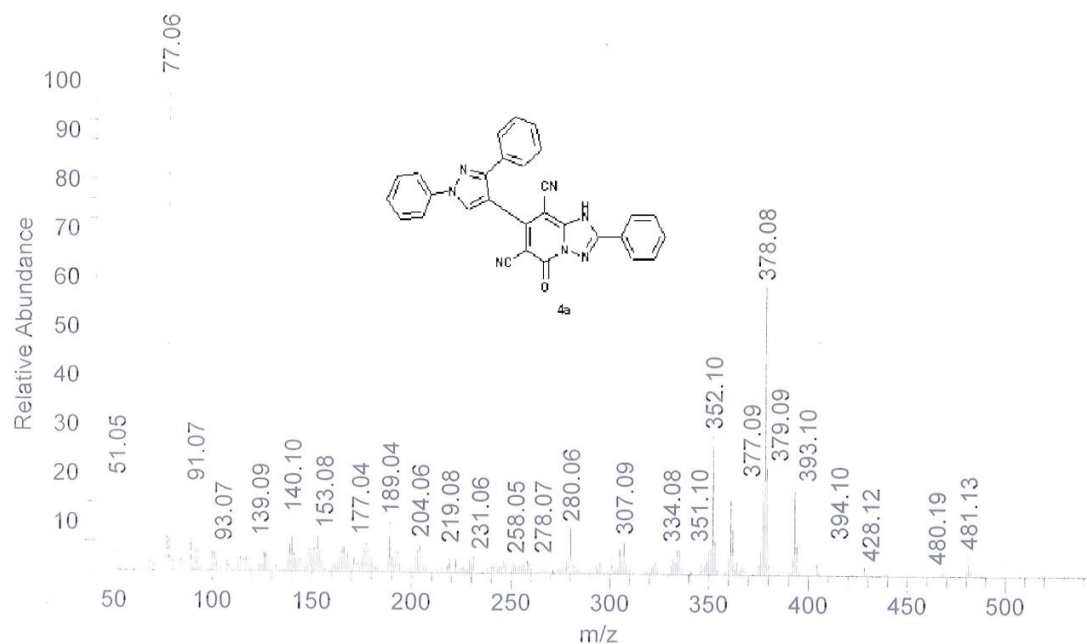

# Peak Find - Memory-79

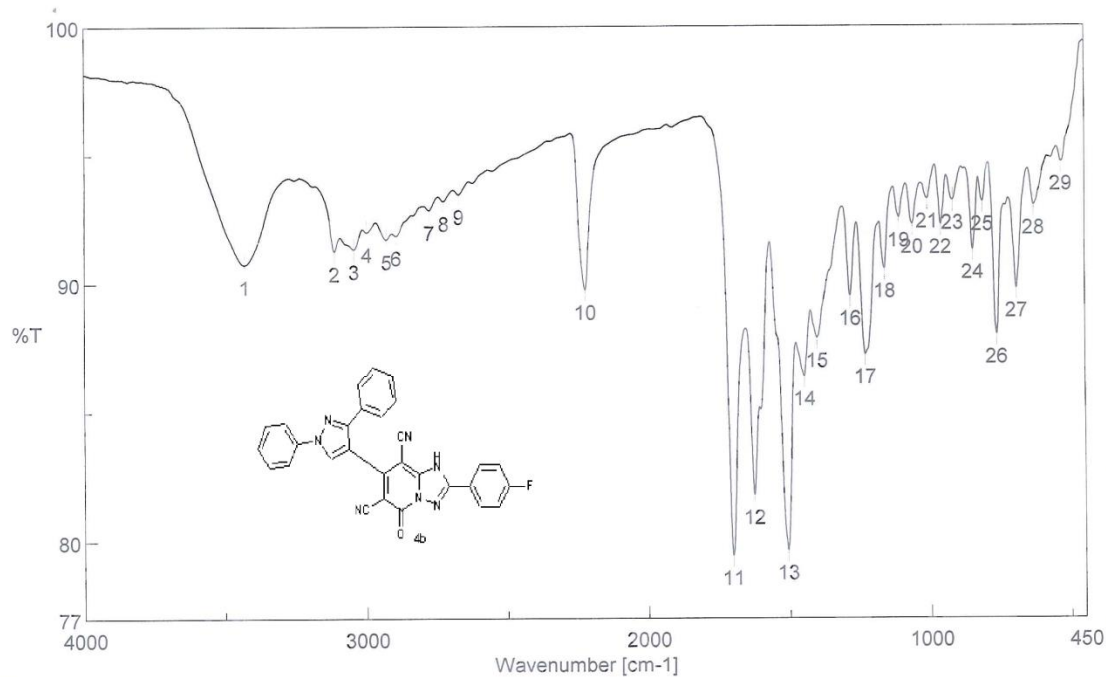

[Comments]  
Sample name V8  
Comment 21/4/2016  
User IR  
Division IR  
Company MAC

## [ Result of Peak Picking ]

| No. | Position | Intensity | No. | Position | Intensity | No. | Position | Intensity |
|-----|----------|-----------|-----|----------|-----------|-----|----------|-----------|
| 1   | 3431.71  | 90.7308   | 2   | 3113.51  | 91.2383   | 3   | 3044.09  | 91.3233   |
| 4   | 2998.77  | 91.9883   | 5   | 2928.38  | 91.6995   | 6   | 2893.66  | 91.8429   |
| 7   | 2776.03  | 92.8299   | 8   | 2724.92  | 93.1782   | 9   | 2670.93  | 93.4424   |
| 10  | 2221.59  | 89.7271   | 11  | 1700.91  | 79.4129   | 12  | 1625.7   | 81.7832   |
| 13  | 1507.1   | 79.6191   | 14  | 1447.31  | 86.3816   | 15  | 1402     | 87.8605   |
| 16  | 1284.36  | 89.4913   | 17  | 1231.33  | 87.2354   | 18  | 1161.9   | 90.5451   |
| 19  | 1110.8   | 92.5073   | 20  | 1062.59  | 92.261    | 21  | 1009.55  | 93.2417   |
| 22  | 961.341  | 92.2498   | 23  | 918.914  | 93.1856   | 24  | 847.561  | 91.2779   |
| 25  | 812.849  | 93.1294   | 26  | 762.709  | 88.0056   | 27  | 692.32   | 89.7891   |
| 28  | 630.609  | 92.984    | 29  | 533.221  | 94.6829   |     |          |           |

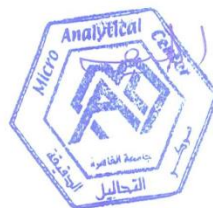

Dr. EmanSameer-VB-H1-DMSO-Main,Defence,Chemical,Laboratory

Pulse Sequence: s2pu1

Solvent: DMSO

Temp: 25.0 C / 298.1 K

QNP1H-300MHz "NMR"

Relax. delay 1.000 sec

Pulse 45.0 degrees

Acq. time 3.127 sec

Width 6000.2 Hz

12 repetitions

OBSERVE H1: 300.0117460 MHz

DATA PROCESSING

FT size 65536

Total time 5 min, 5 sec

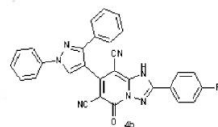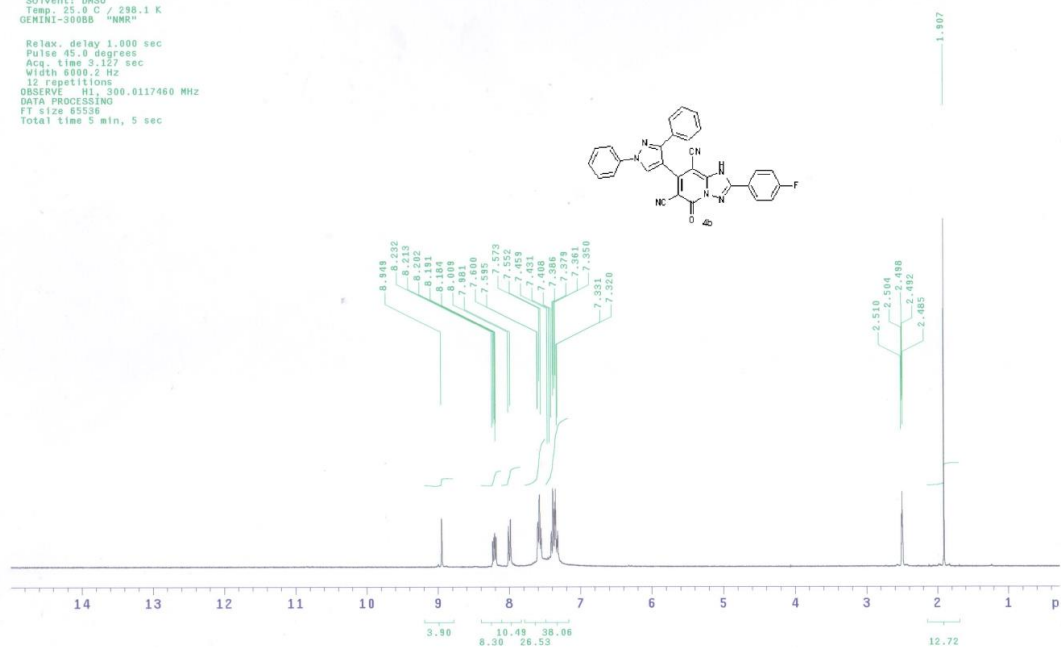

drKhalifah- (4b)

C13CPD DMSO (C:\Bruker\TOPSPIN) aban

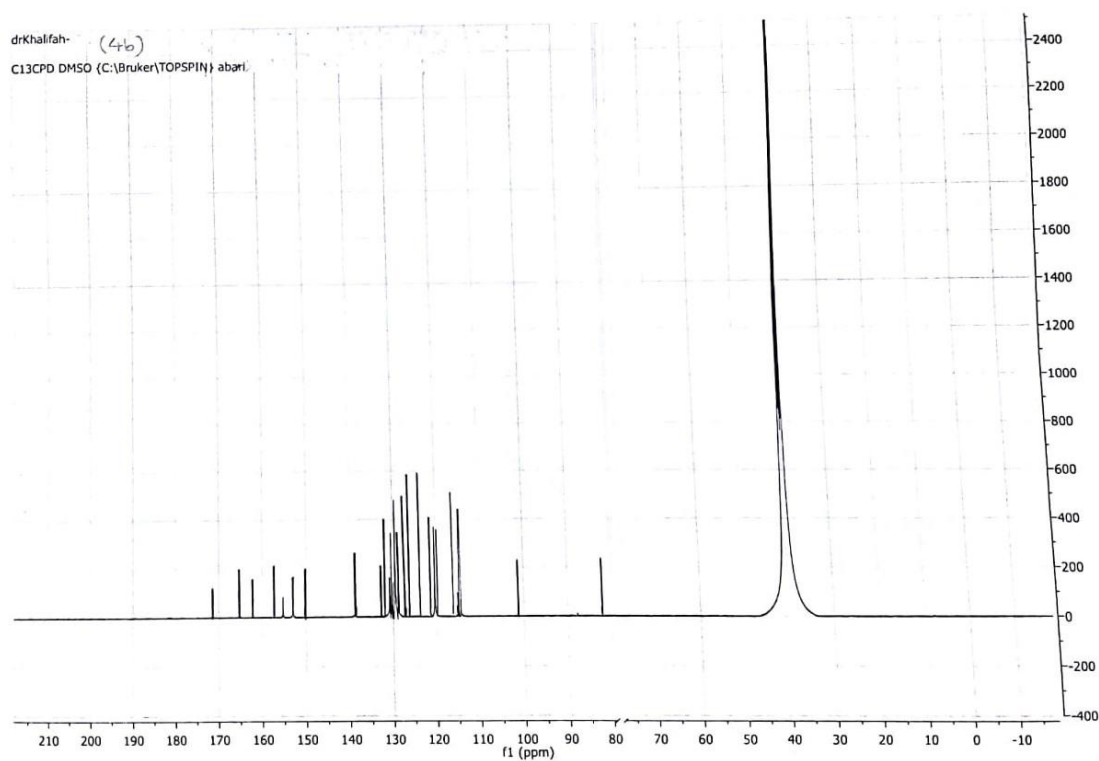



RT: 3.65 - 6.00 SM: 15B

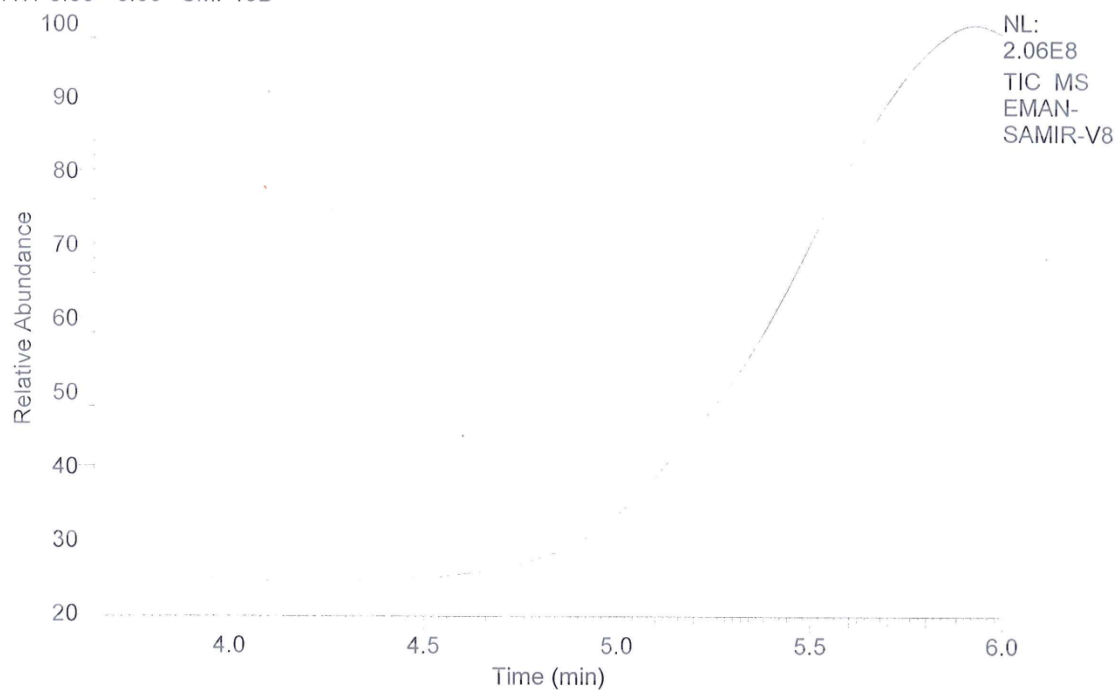

EMAN-SAMIR-V8 #350 RT: 5.87 AV: 1 SB: 2 5.62, 5.67 NL: 3.02E6

T: {0,0} + c EI Full ms [40.00-1000.00]

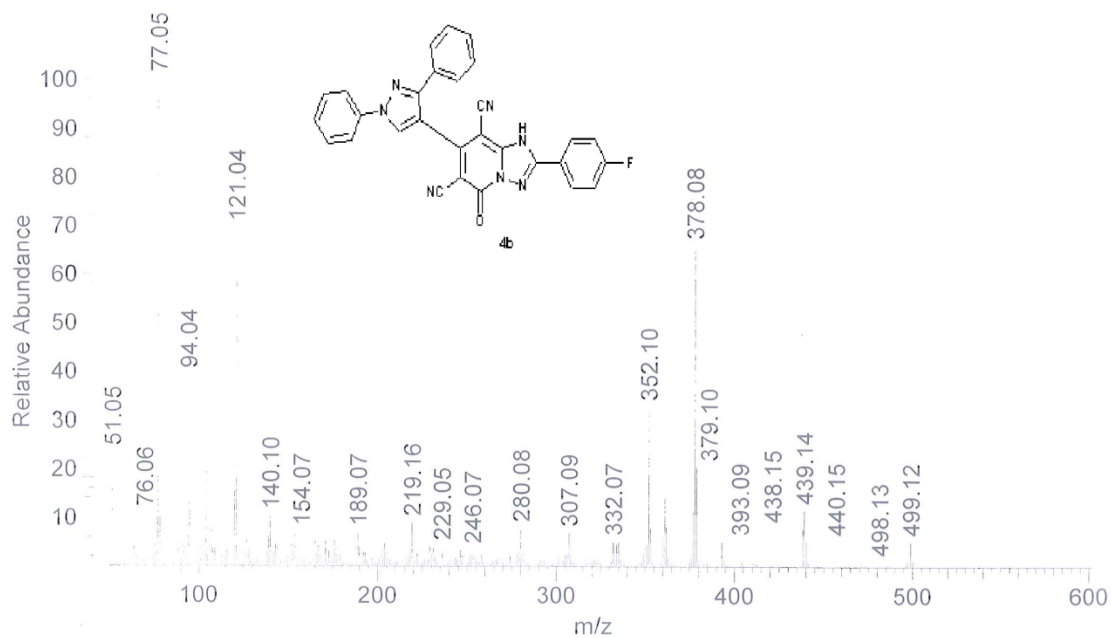

# Peak Find - Memory-75

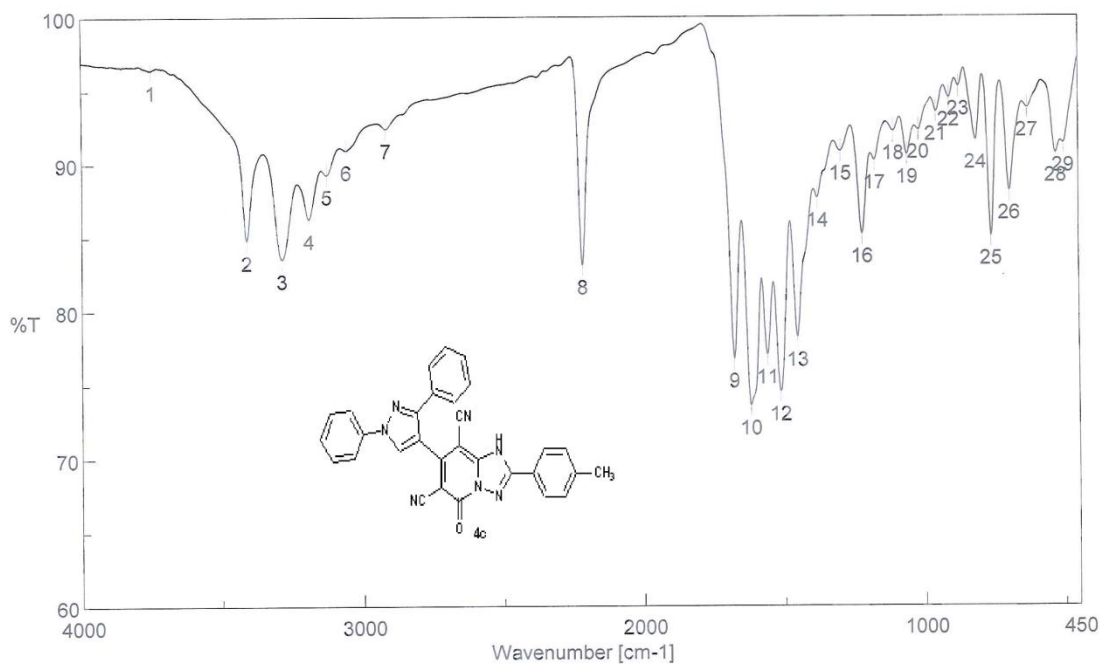

[Comments]  
Sample name V5  
Comment 21/4/2016  
User IR  
Division IR  
Company MAC

## [ Result of Peak Picking ]

| No. | Position | Intensity | No. | Position | Intensity | No. | Position | Intensity |
|-----|----------|-----------|-----|----------|-----------|-----|----------|-----------|
| 1   | 3751.83  | 96.4407   | 2   | 3412.42  | 84.8152   | 3   | 3288.04  | 83.5565   |
| 4   | 3192.58  | 86.2656   | 5   | 3129.9   | 89.2713   | 6   | 3059.51  | 90.9281   |
| 7   | 2918.73  | 92.4031   | 8   | 2216.77  | 83.1174   | 9   | 1677.77  | 76.7889   |
| 10  | 1619.91  | 73.5929   | 11  | 1561.09  | 77.0482   | 12  | 1513.85  | 74.5451   |
| 13  | 1454.06  | 78.2182   | 14  | 1381.75  | 87.6242   | 15  | 1298.82  | 90.8159   |
| 16  | 1222.65  | 85.2068   | 17  | 1178.29  | 90.1832   | 18  | 1110.8   | 92.1918   |
| 19  | 1061.62  | 90.5723   | 20  | 1020.16  | 92.2723   | 21  | 957.484  | 93.4834   |
| 22  | 911.201  | 94.463    | 23  | 876.488  | 95.2154   | 24  | 815.742  | 91.5639   |
| 25  | 761.744  | 85.056    | 26  | 696.177  | 88.1222   | 27  | 631.573  | 93.7541   |
| 28  | 530.328  | 90.6626   | 29  | 503.33   | 91.3407   |     |          |           |

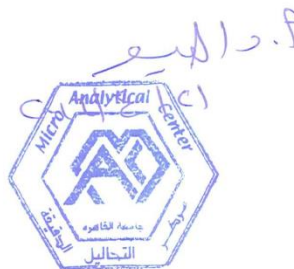

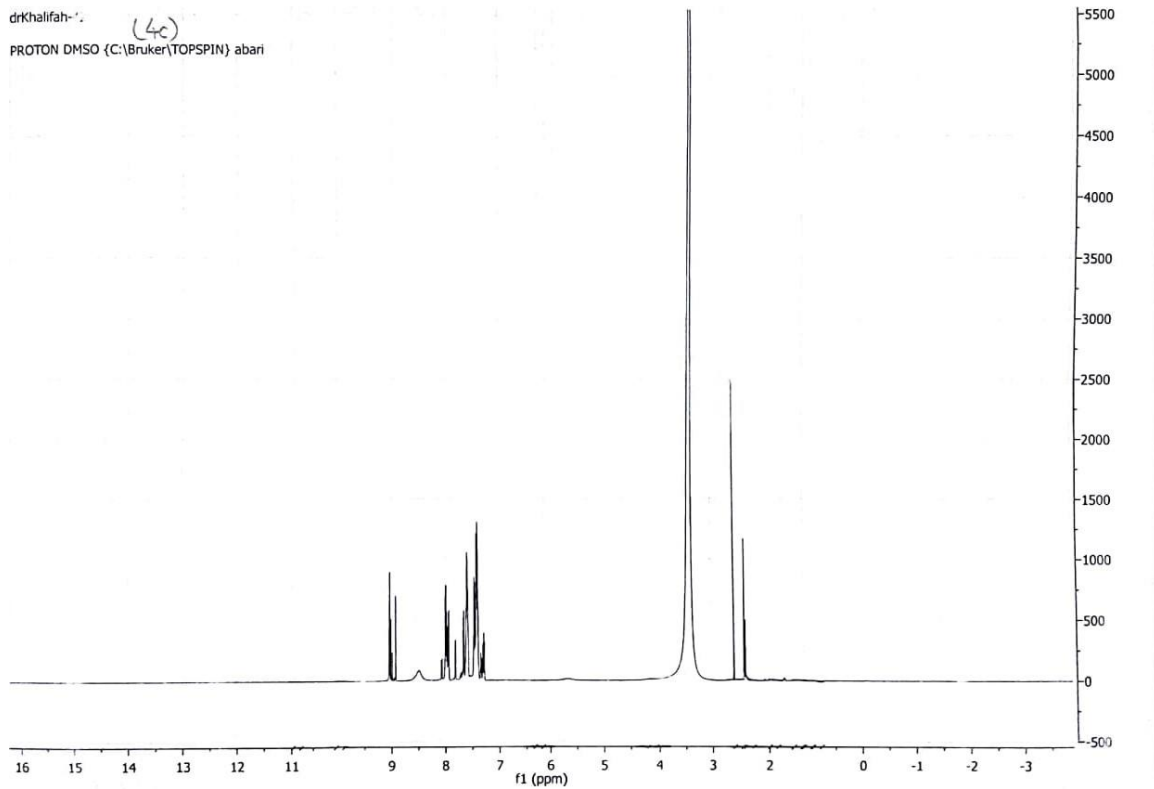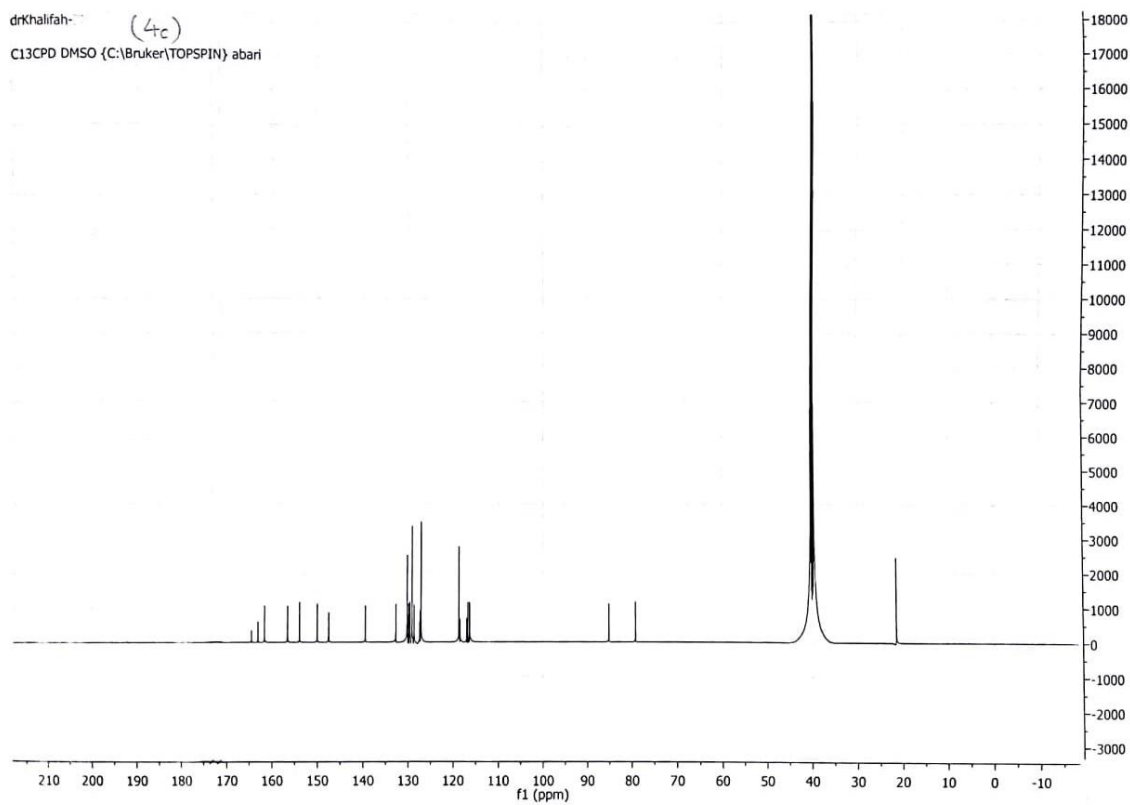

RT: 0.00 - 6.00 SM: 15B

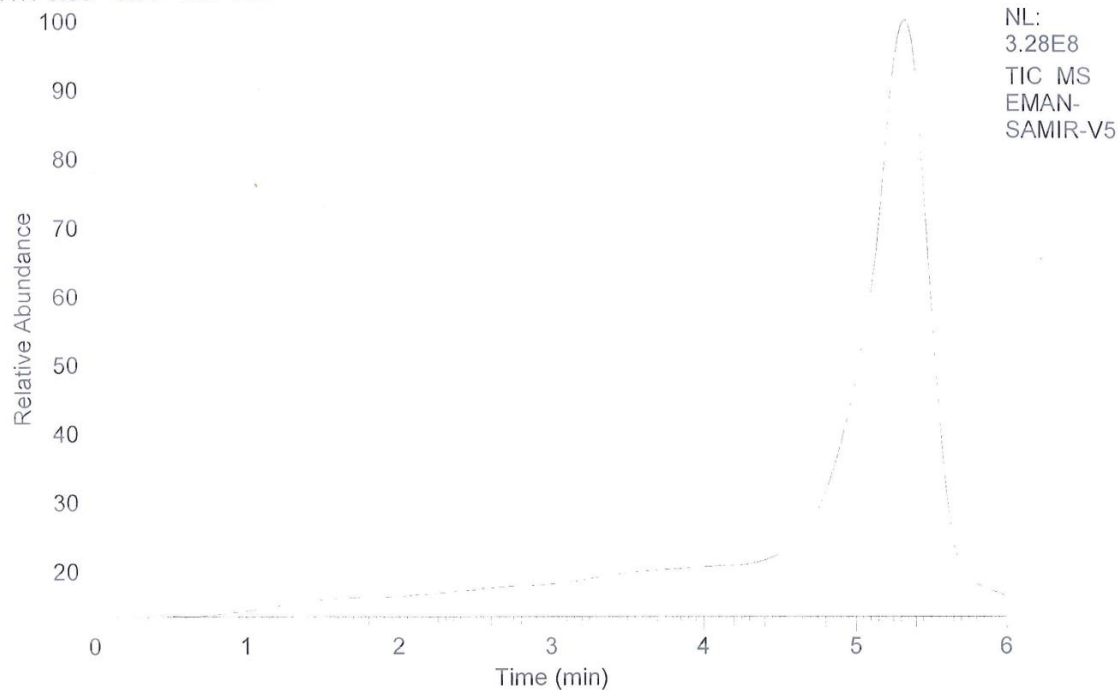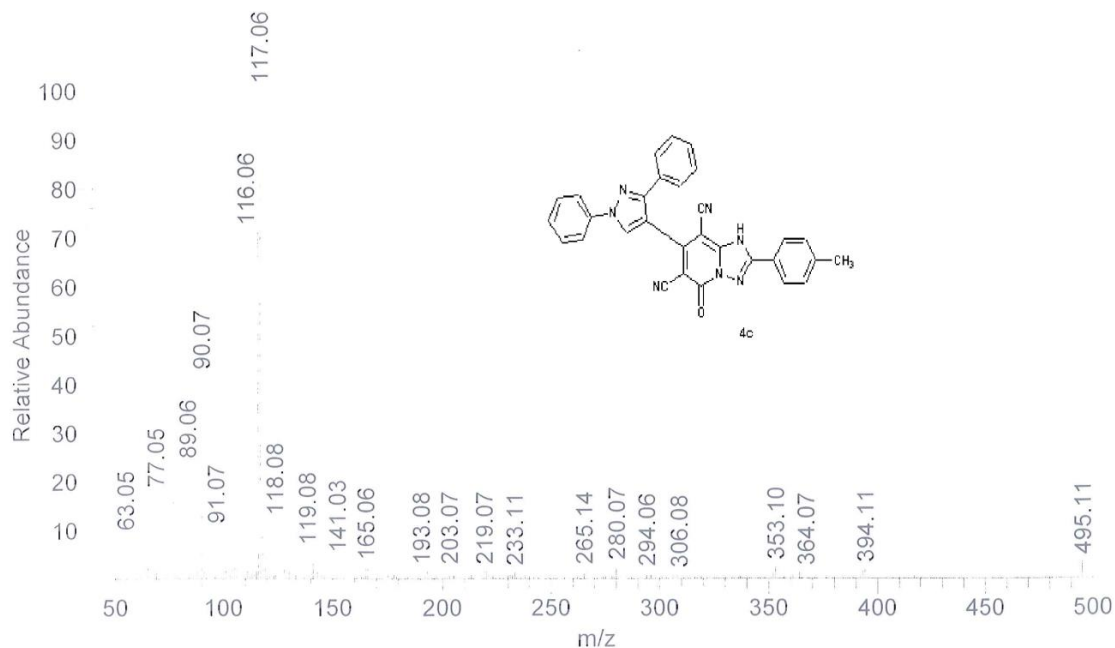

# Peak Find - Memory-166

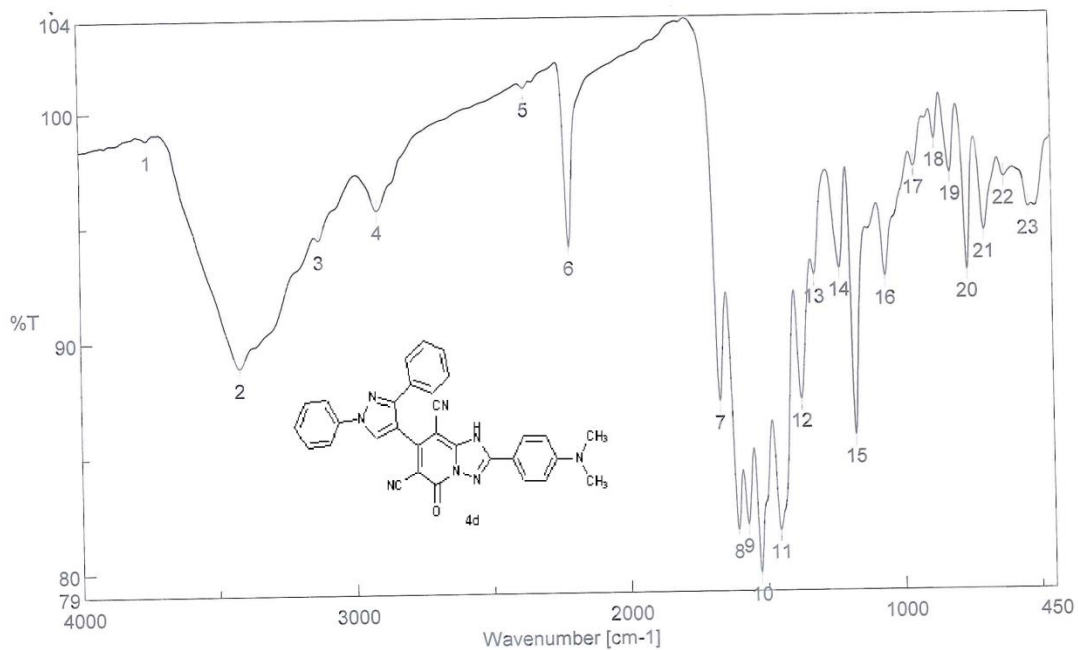

[Comments]  
Sample name V3  
Comment 21/4/2016  
User IR  
Division IR  
Company MAC

## [ Result of Peak Picking ]

| No. | Position | Intensity | No. | Position | Intensity | No. | Position | Intensity |
|-----|----------|-----------|-----|----------|-----------|-----|----------|-----------|
| 1   | 3752.8   | 98.8256   | 2   | 3420.14  | 88.889    | 3   | 3129.9   | 94.3897   |
| 4   | 2914.88  | 95.6619   | 5   | 2372.01  | 100.941   | 6   | 2212.92  | 93.9934   |
| 7   | 1668.12  | 87.2539   | 8   | 1607.38  | 81.6467   | 9   | 1571.7   | 81.8936   |
| 10  | 1527.35  | 79.7889   | 11  | 1455.03  | 81.6197   | 12  | 1372.1   | 87.3005   |
| 13  | 1321.96  | 92.6402   | 14  | 1229.4   | 92.937    | 15  | 1174.44  | 85.7382   |
| 16  | 1061.62  | 92.557    | 17  | 953.627  | 97.3232   | 18  | 875.524  | 98.5203   |
| 19  | 819.598  | 97.0329   | 20  | 759.816  | 92.8178   | 21  | 697.141  | 94.5193   |
| 22  | 622.895  | 96.8236   | 23  | 535.15   | 95.5007   |     |          |           |

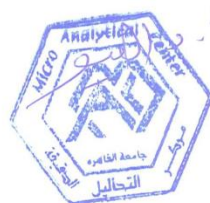

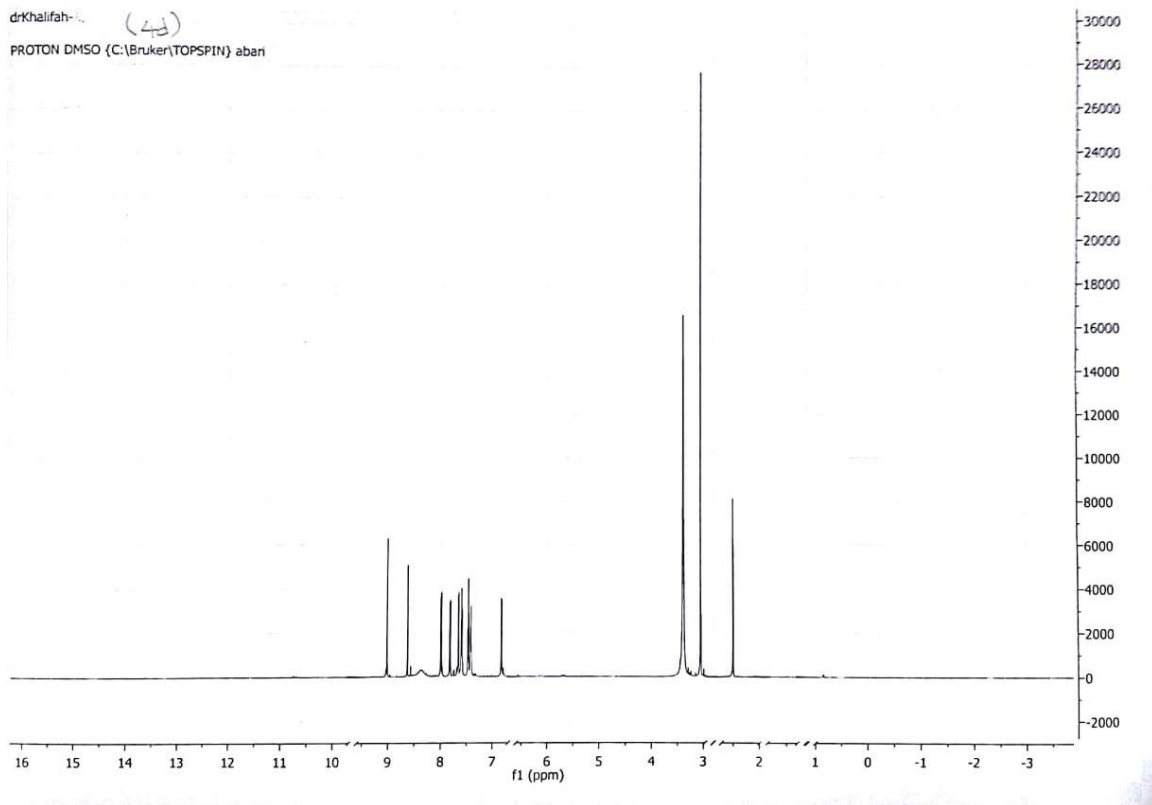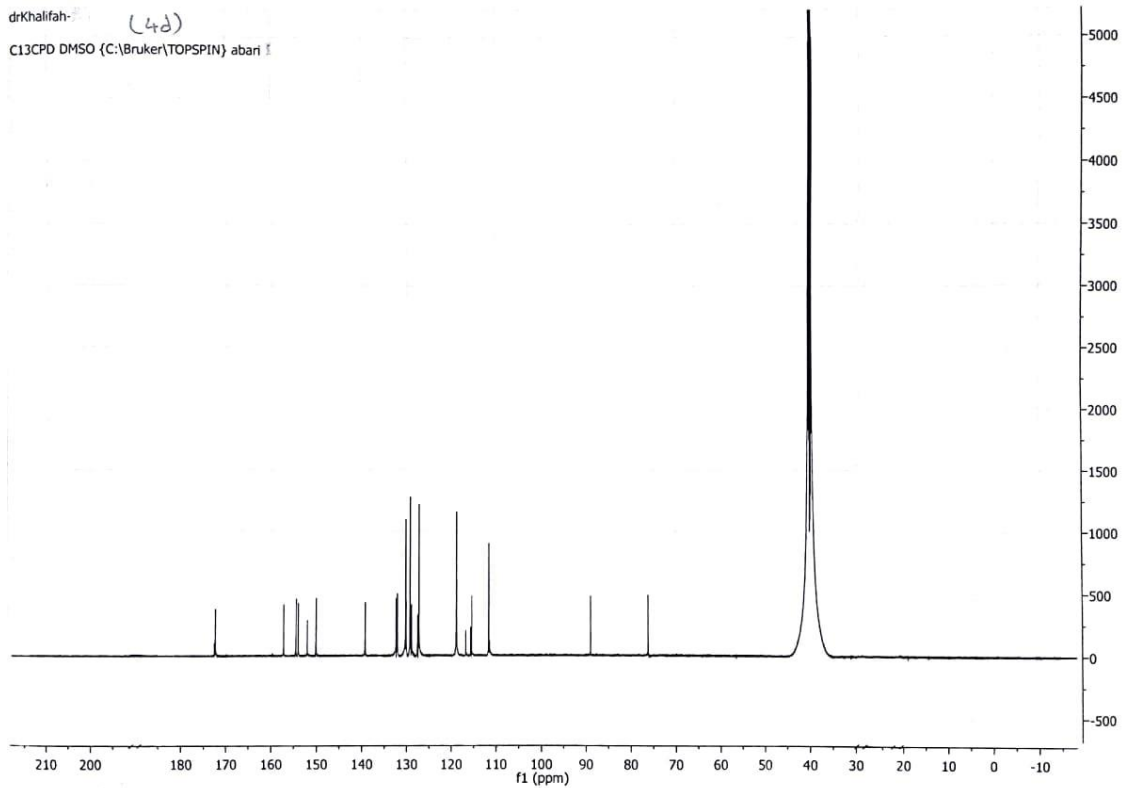

RT: 0.00 - 6.00 SM: 15B

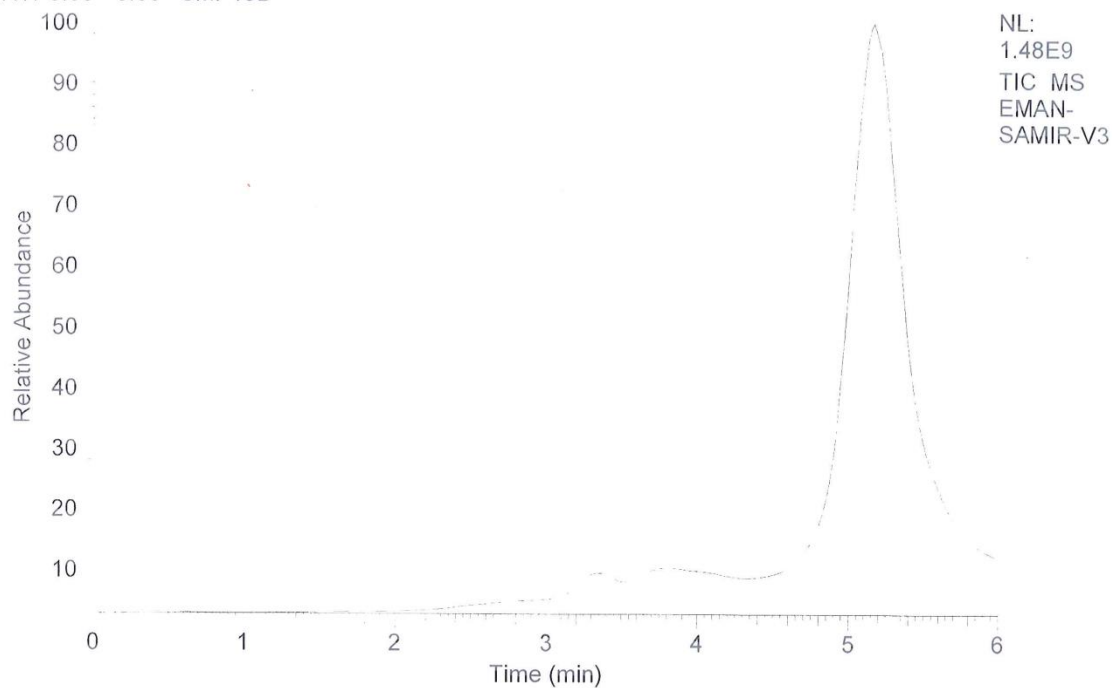

EMAN-SAMIR-V3 #342 RT: 5.74 AV: 1 SB: 2 5.74, 5.69 NL: 1.17E5

T: {0,0} + c EI Full ms [40.00-1000.00]

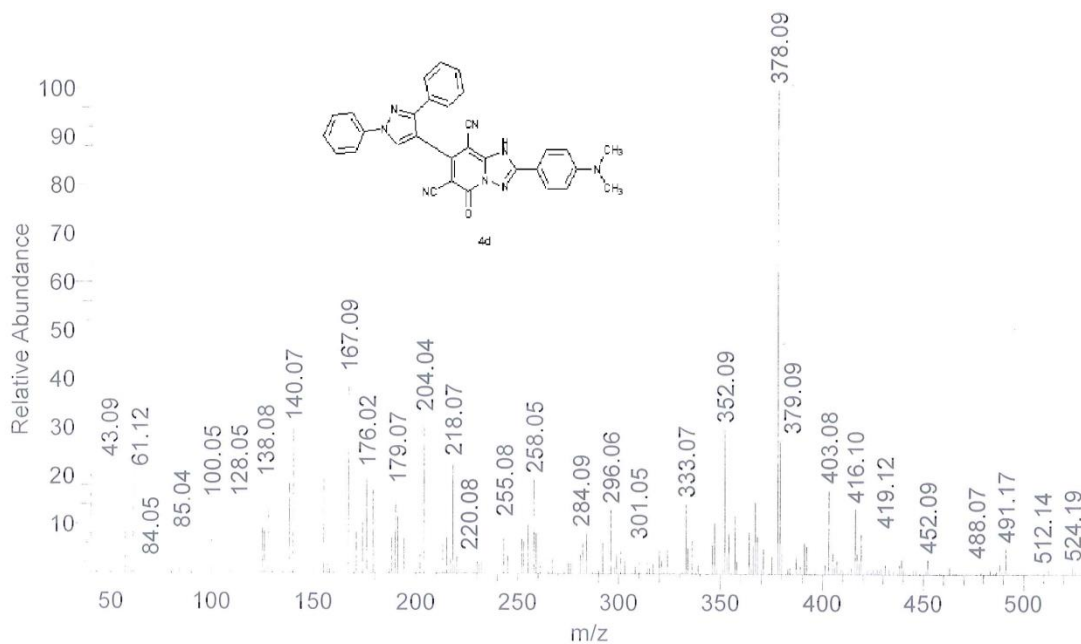

# Peak Find - Memory-83

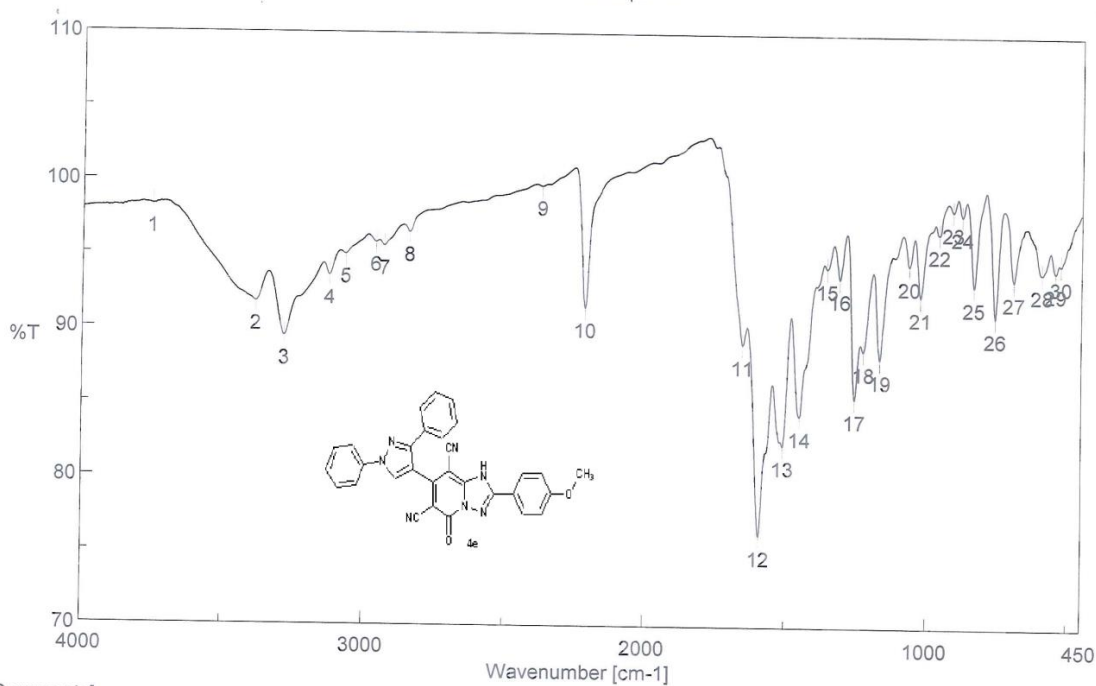

[Comments]  
Sample name V2  
Comment 21/4/2016  
User IR  
Division IR  
Company MAC

## [ Result of Peak Picking ]

| No. | Position | Intensity | No. | Position | Intensity | No. | Position | Intensity |
|-----|----------|-----------|-----|----------|-----------|-----|----------|-----------|
| 1   | 3752.8   | 98.2425   | 2   | 3383.5   | 91.7303   | 3   | 3283.21  | 89.4176   |
| 4   | 3124.12  | 93.5176   | 5   | 3067.23  | 94.9572   | 6   | 2959.23  | 95.7752   |
| 7   | 2929.34  | 95.5476   | 8   | 2839.67  | 96.4601   | 9   | 2368.16  | 99.6422   |
| 10  | 2212.92  | 91.4222   | 11  | 1652.7   | 89.0038   | 12  | 1592.91  | 76.1516   |
| 13  | 1509.99  | 82.2487   | 14  | 1450.21  | 84.2486   | 15  | 1355.71  | 94.192    |
| 16  | 1310.39  | 93.5207   | 17  | 1256.4   | 85.4358   | 18  | 1225.54  | 88.6356   |
| 19  | 1166.72  | 88.1039   | 20  | 1064.51  | 94.4234   | 21  | 1024.02  | 92.3392   |
| 22  | 957.484  | 96.5836   | 23  | 909.272  | 98.1144   | 24  | 876.488  | 97.8065   |
| 25  | 833.098  | 93.0488   | 26  | 756.923  | 90.963    | 27  | 691.355  | 93.4501   |
| 28  | 592.039  | 93.9612   | 29  | 543.828  | 94.047    | 30  | 524.543  | 94.551    |

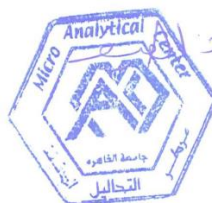



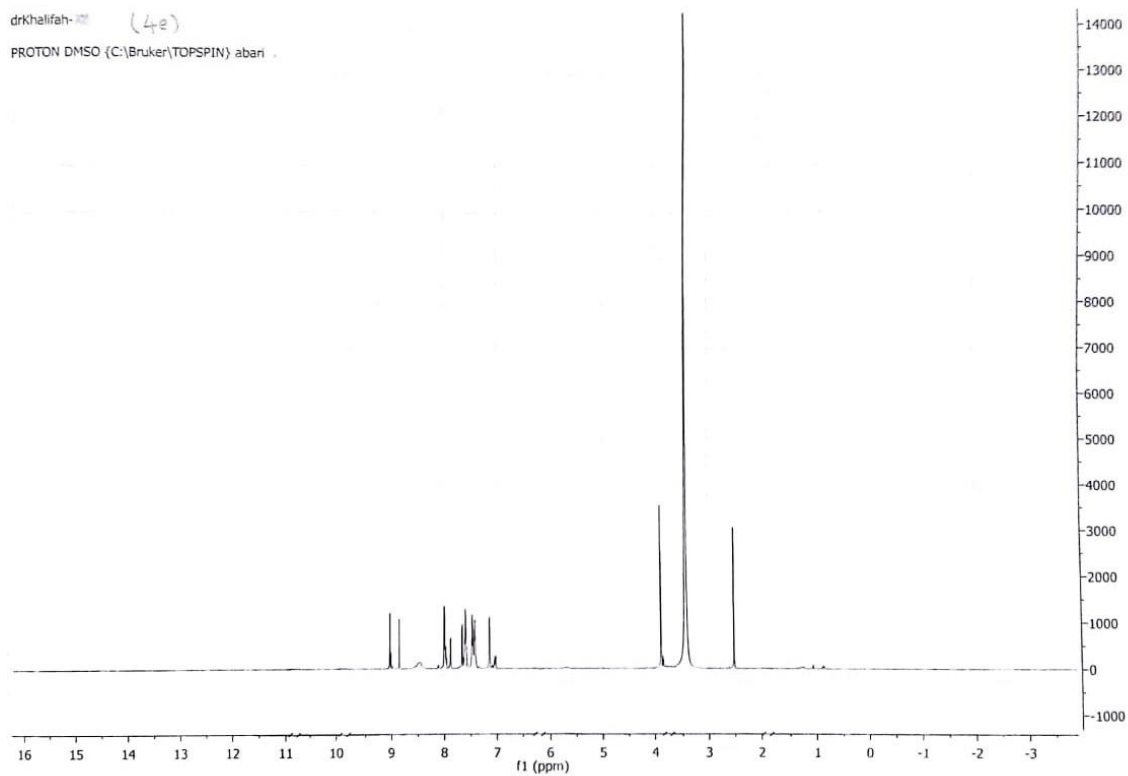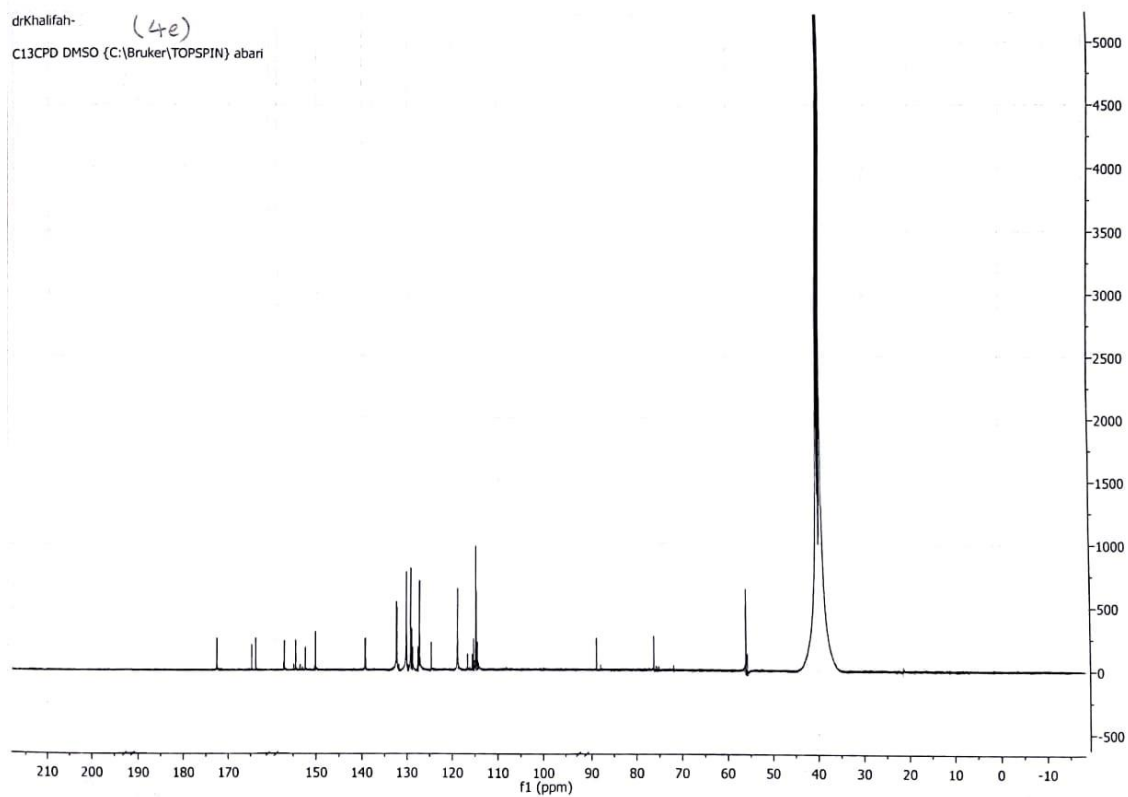

RT: 0.35 - 4.57 SM: 15B

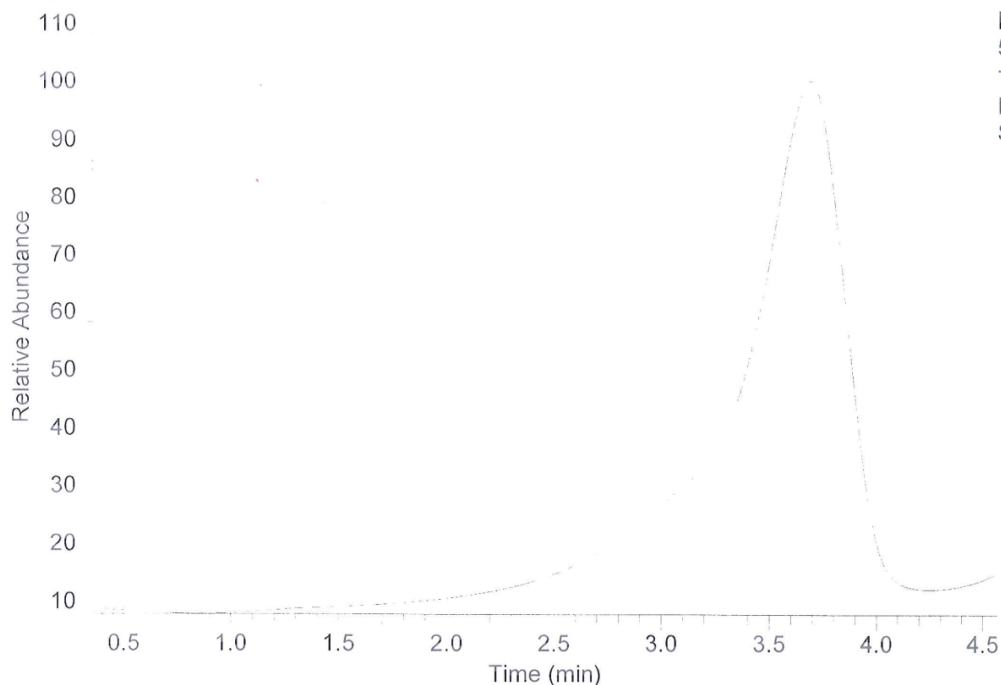

NL:  
5.53E8  
TIC MS  
EMAN-  
SAMIR-V2

EMAN-SAMIR-V2 #349 RT: 5.86 AV: 1 SB: 2 5.87, 5.89 NL: 4.85E5  
T: {0,0} + c EI Full ms [40.00-1000.00]

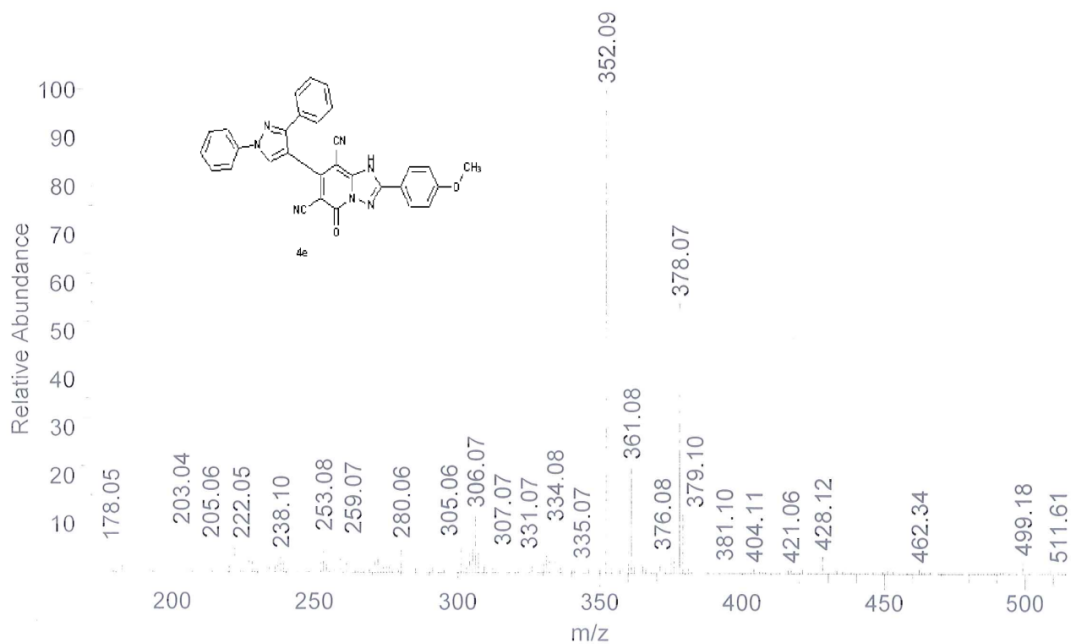

# Peak Find - Memory-146

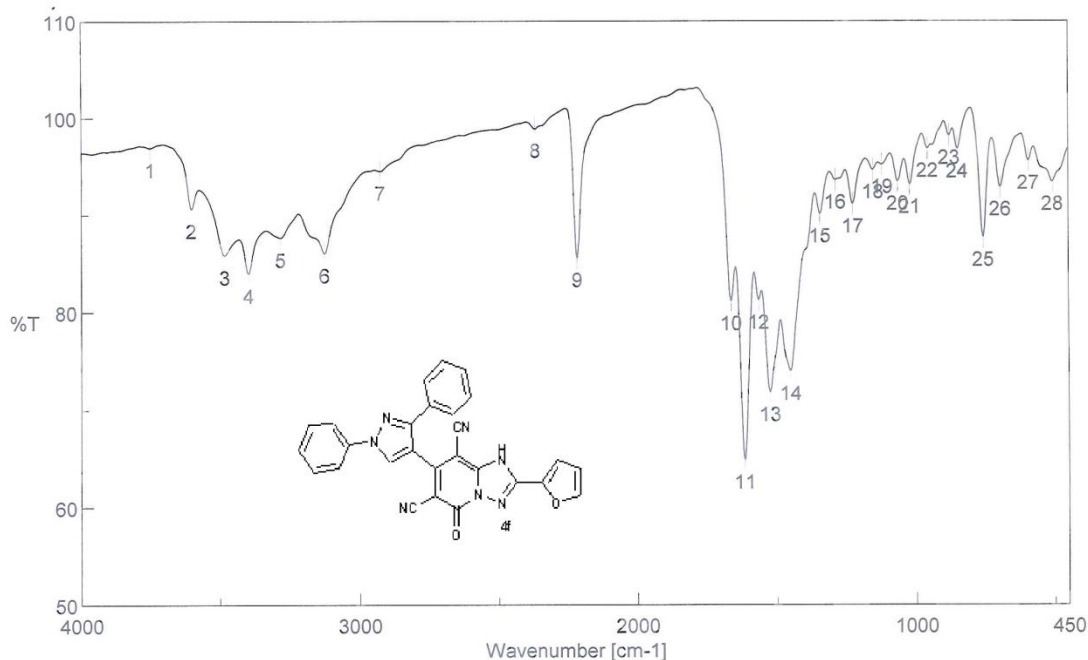

[Comments]  
Sample name V7  
Comment 21/4/2016  
User IR  
Division IR  
Company MAC

## [ Result of Peak Picking ]

| No. | Position | Intensity | No. | Position | Intensity | No. | Position | Intensity |
|-----|----------|-----------|-----|----------|-----------|-----|----------|-----------|
| 1   | 3751.83  | 96.8801   | 2   | 3602.38  | 90.5856   | 3   | 3483.78  | 85.8297   |
| 4   | 3398.92  | 83.9347   | 5   | 3284.18  | 87.6042   | 6   | 3126.04  | 86.0249   |
| 7   | 2926.45  | 94.4632   | 8   | 2366.23  | 98.8299   | 9   | 2215.81  | 85.5495   |
| 10  | 1663.3   | 81.1049   | 11  | 1616.06  | 64.883    | 12  | 1564.95  | 81.2385   |
| 13  | 1524.45  | 71.8292   | 14  | 1451.17  | 73.9846   | 15  | 1344.14  | 90.0559   |
| 16  | 1289.18  | 93.5517   | 17  | 1226.5   | 91.0857   | 18  | 1154.19  | 94.603    |
| 19  | 1121.4   | 95.1339   | 20  | 1064.51  | 93.3897   | 21  | 1020.16  | 93.0888   |
| 22  | 956.52   | 96.7845   | 23  | 878.417  | 98.1178   | 24  | 848.525  | 96.7064   |
| 25  | 755.959  | 87.6408   | 26  | 694.248  | 92.8085   | 27  | 593.004  | 95.5088   |
| 28  | 507.187  | 93.3419   |     |          |           |     |          |           |

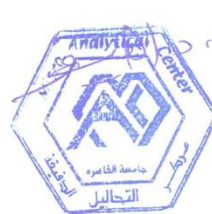

drKhalifah-22 (47)  
PROTON DMSO (C:\Bruker\TOPSPIN) aban

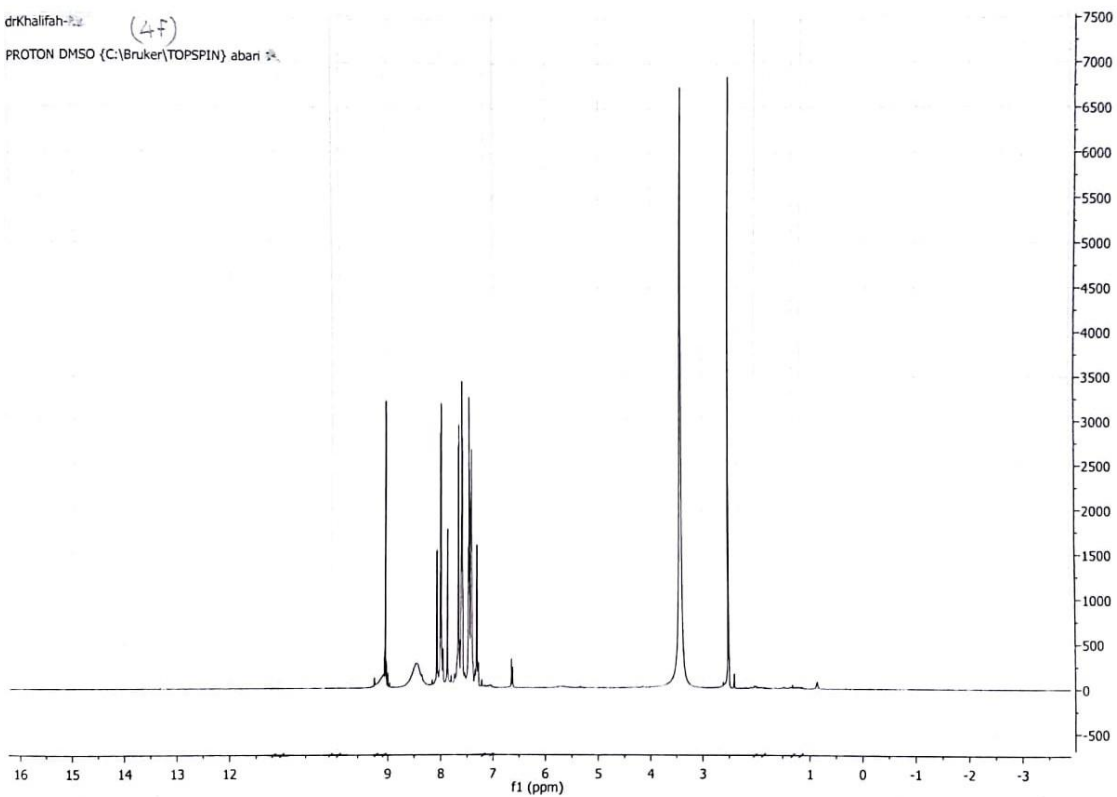

# Peak Find - Memory-132

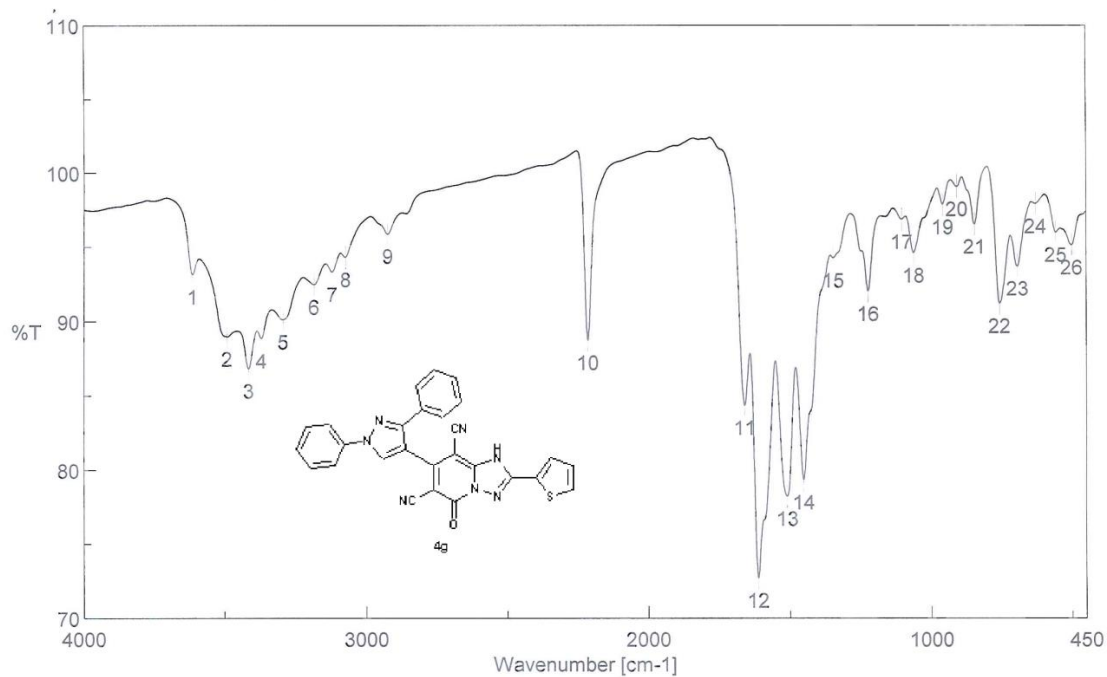

[Comments]  
Sample name V9  
Comment 21/4/2016  
User IR  
Division IR  
Company MAC

## [ Result of Peak Picking ]

| No. | Position | Intensity | No. | Position | Intensity | No. | Position | Intensity |
|-----|----------|-----------|-----|----------|-----------|-----|----------|-----------|
| 1   | 3614.91  | 93.1463   | 2   | 3492.45  | 88.9847   | 3   | 3416.28  | 86.823    |
| 4   | 3371.92  | 88.8497   | 5   | 3294.79  | 90.1284   | 6   | 3185.83  | 92.468    |
| 7   | 3122.19  | 93.3126   | 8   | 3074.94  | 94.3055   | 9   | 2924.52  | 95.8622   |
| 10  | 2213.88  | 88.725    | 11  | 1659.45  | 84.3218   | 12  | 1613.16  | 72.7009   |
| 13  | 1509.99  | 78.2114   | 14  | 1452.14  | 79.318    | 15  | 1347.03  | 94.2343   |
| 16  | 1223.61  | 92.0072   | 17  | 1105.01  | 96.8431   | 18  | 1062.59  | 94.5773   |
| 19  | 959.412  | 97.8438   | 20  | 908.308  | 99.05     | 21  | 845.633  | 96.5255   |
| 22  | 756.923  | 91.2037   | 23  | 693.284  | 93.6961   | 24  | 629.644  | 97.908    |
| 25  | 557.327  | 95.972    | 26  | 501.401  | 95.119    |     |          |           |

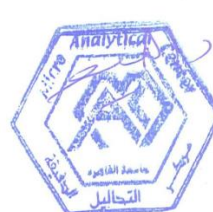

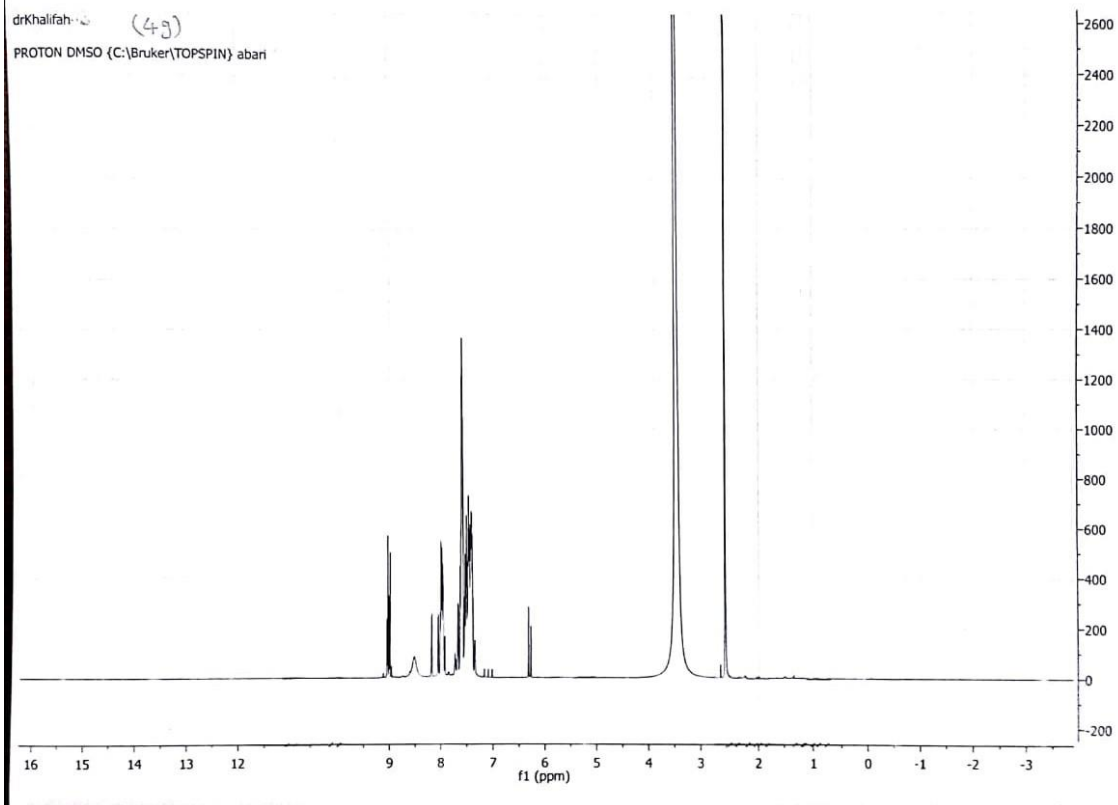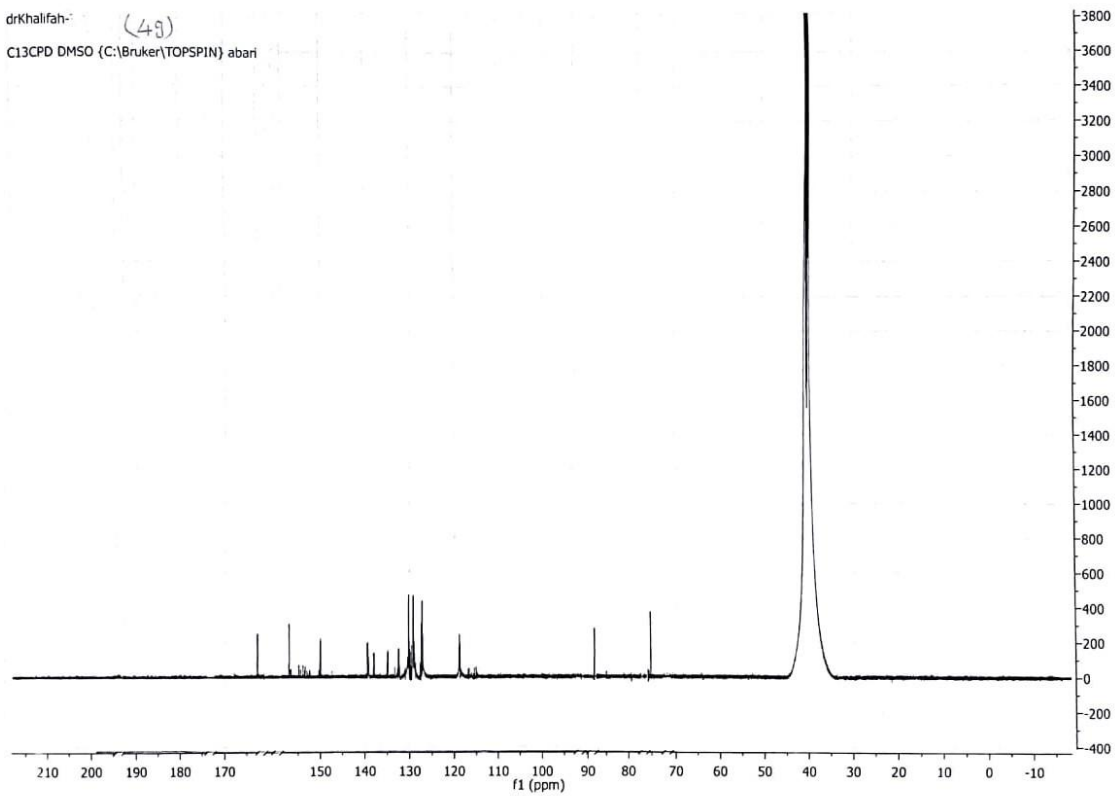

RT: 0.00 - 6.00 SM: 15B

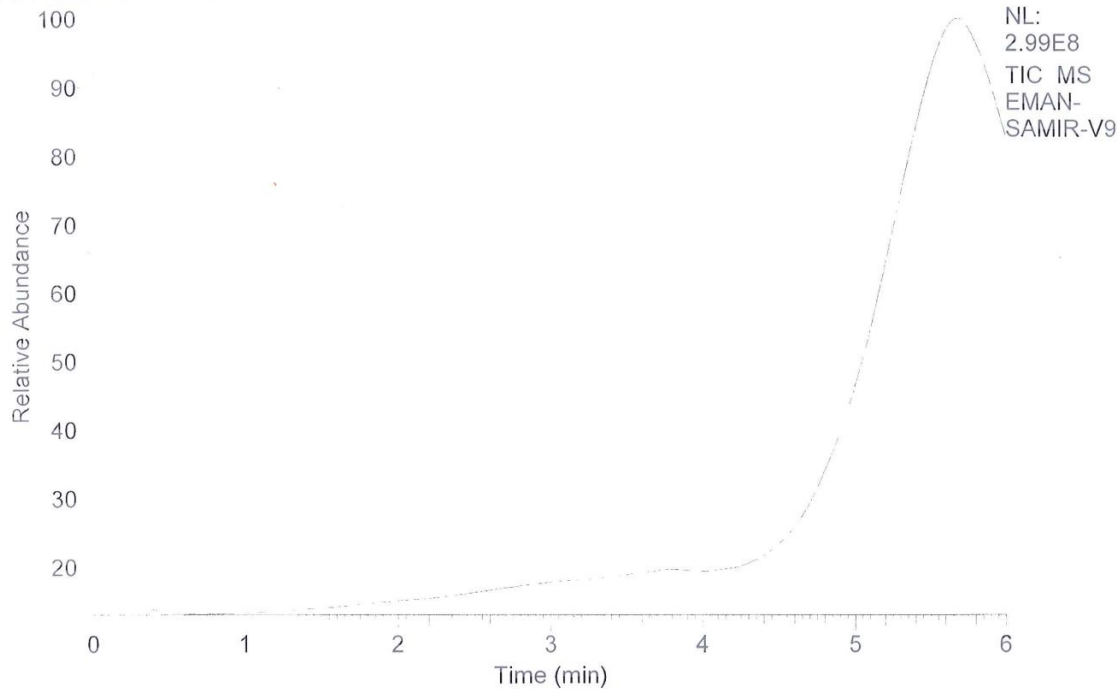

EMAN-SAMIR-V9 #364 RT: 6.11 AV: 1 NL: 2.17E7

T: {0,0} + c EI Full ms [40.00-1000.00]

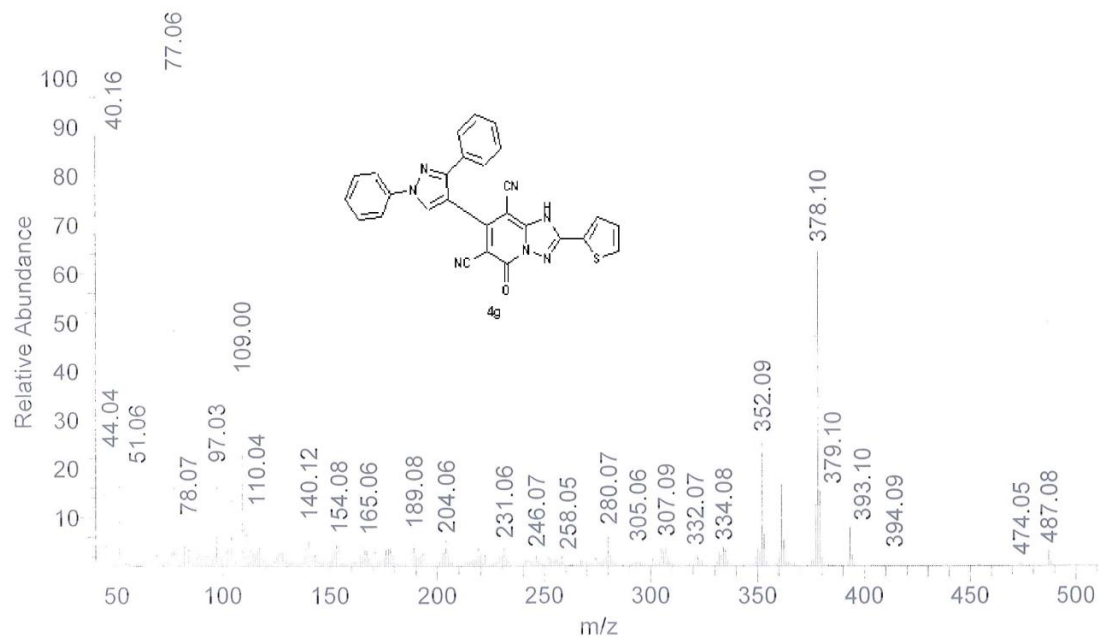

# Peak Find - Memory-105

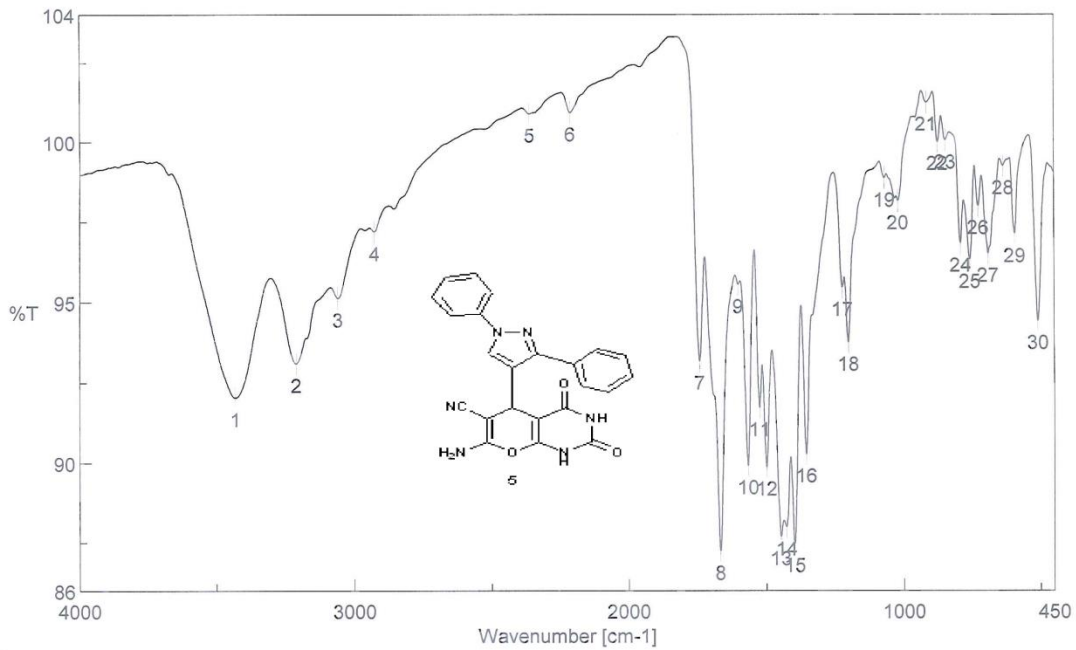

[Comments]  
Sample name G12  
Comment 21/4/2016  
User IR  
Division IR  
Company MAC

## [ Result of Peak Picking ]

| No. | Position | Intensity | No. | Position | Intensity | No. | Position | Intensity |
|-----|----------|-----------|-----|----------|-----------|-----|----------|-----------|
| 1   | 3432.67  | 92.0263   | 2   | 3211.86  | 93.0937   | 3   | 3060.48  | 95.1261   |
| 4   | 2927.41  | 97.1889   | 5   | 2360.44  | 100.883   | 6   | 2210.99  | 100.919   |
| 7   | 1741.41  | 93.1718   | 8   | 1667.16  | 87.2312   | 9   | 1602.56  | 95.5524   |
| 10  | 1566.88  | 89.9075   | 11  | 1524.45  | 91.7129   | 12  | 1499.38  | 89.8574   |
| 13  | 1448.28  | 87.6804   | 14  | 1428.03  | 87.9813   | 15  | 1398.14  | 87.464    |
| 16  | 1355.71  | 90.2735   | 17  | 1223.61  | 95.4643   | 18  | 1201.43  | 93.7594   |
| 19  | 1069.33  | 98.8579   | 20  | 1019.19  | 98.1515   | 21  | 915.058  | 101.241   |
| 22  | 873.596  | 99.9985   | 23  | 845.633  | 100.044   | 24  | 790.671  | 96.8366   |
| 25  | 756.923  | 96.3315   | 26  | 726.068  | 97.9993   | 27  | 690.391  | 96.5187   |
| 28  | 635.43   | 99.2373   | 29  | 593.004  | 97.1263   | 30  | 509.115  | 94.4356   |

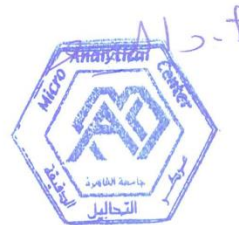



drKhalifah--

(5)

PROTON DMSO (C:\Bruker\TOPSPIN) abari

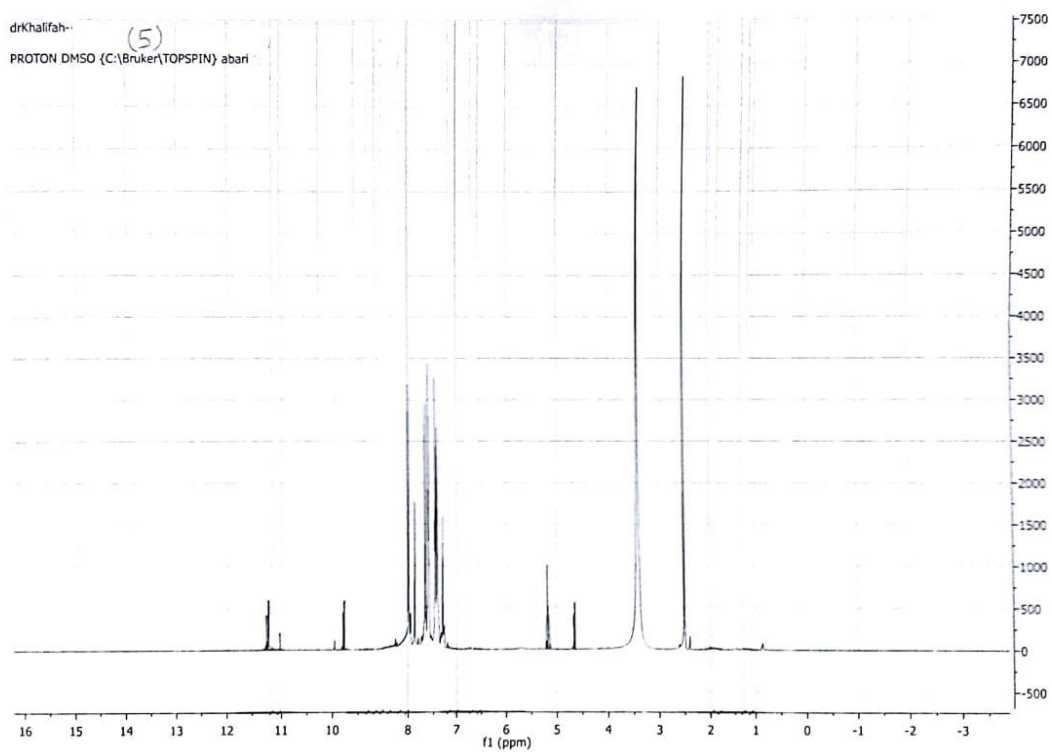

RT: 0.00 - 6.00 SM: 15B

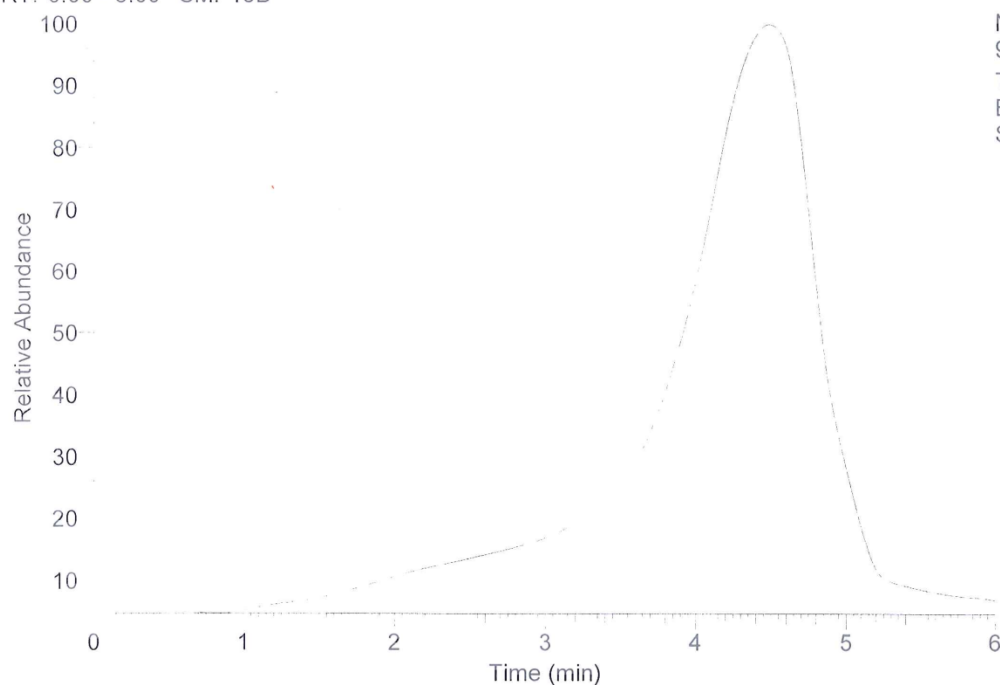

NL:  
9.96E8  
TIC MS  
EMAN-  
SAMIR-G12

EMAN-SAMIR-G12 #201 RT: 3.38 AV: 1 SB: 18 3.30-3.40 , 3.26-3.43 NL: 8.93E5

T: {0,0} + c EI Full ms [40.00-1000.00]

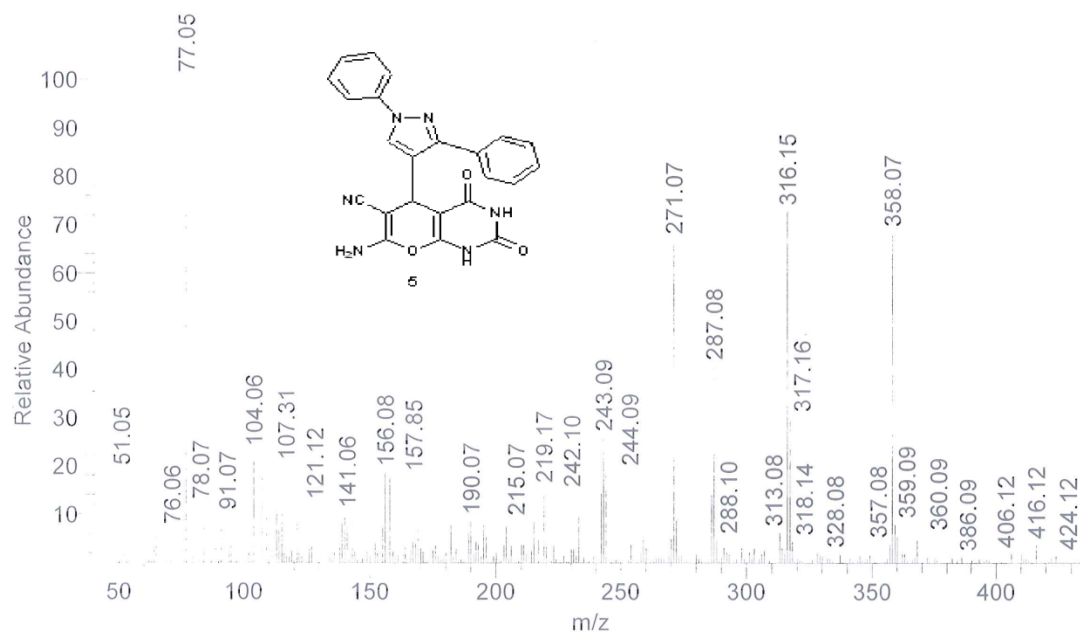

# Peak Find - Memory-174

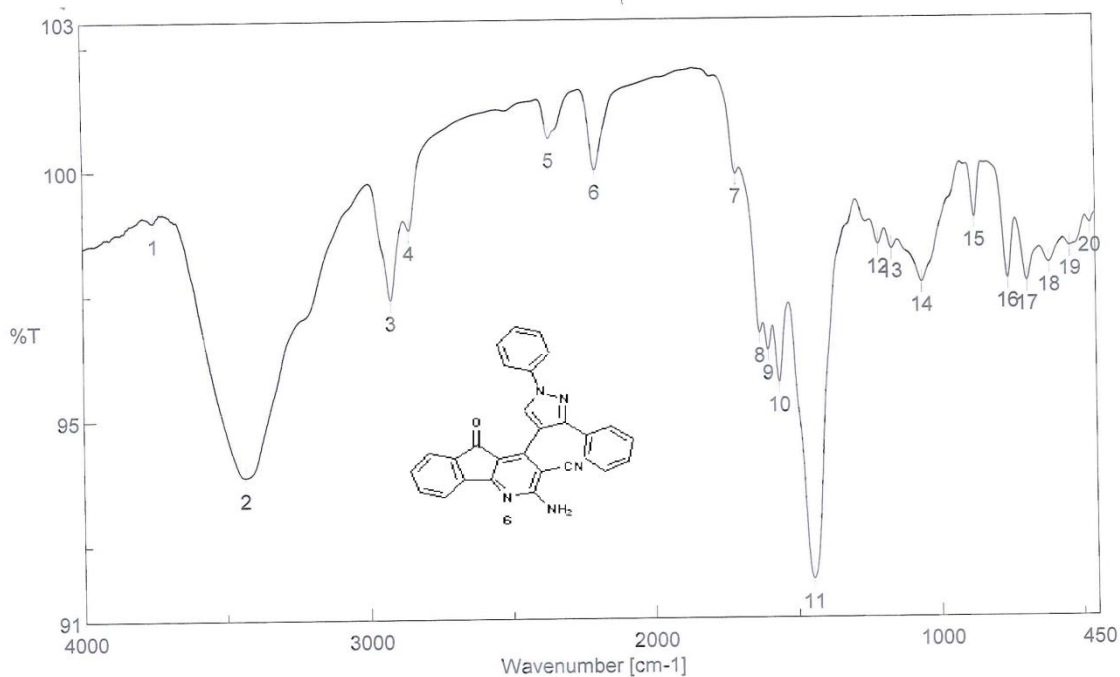

[Comments]  
 Sample name G10  
 Comment 21/4/2016  
 User IR  
 Division IR  
 Company MAC

## [ Result of Peak Picking ]

| No. | Position | Intensity | No. | Position | Intensity | No. | Position | Intensity |
|-----|----------|-----------|-----|----------|-----------|-----|----------|-----------|
| 1   | 3751.83  | 98.9668   | 2   | 3434.6   | 93.8693   | 3   | 2923.56  | 97.3875   |
| 4   | 2857.99  | 98.7835   | 5   | 2363.34  | 100.619   | 6   | 2202.31  | 99.9702   |
| 7   | 1708.62  | 99.8701   | 8   | 1629.55  | 96.6876   | 9   | 1600.63  | 96.3423   |
| 10  | 1562.06  | 95.7027   | 11  | 1448.28  | 91.7633   | 12  | 1213.01  | 98.4419   |
| 13  | 1165.76  | 98.3489   | 14  | 1060.66  | 97.6774   | 15  | 874.56   | 98.965    |
| 16  | 757.888  | 97.743    | 17  | 690.391  | 97.688    | 18  | 613.252  | 98.0502   |
| 19  | 539.971  | 98.3815   | 20  | 468.617  | 98.8338   |     |          |           |

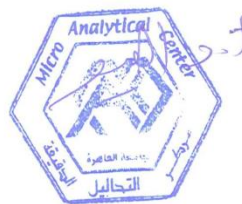

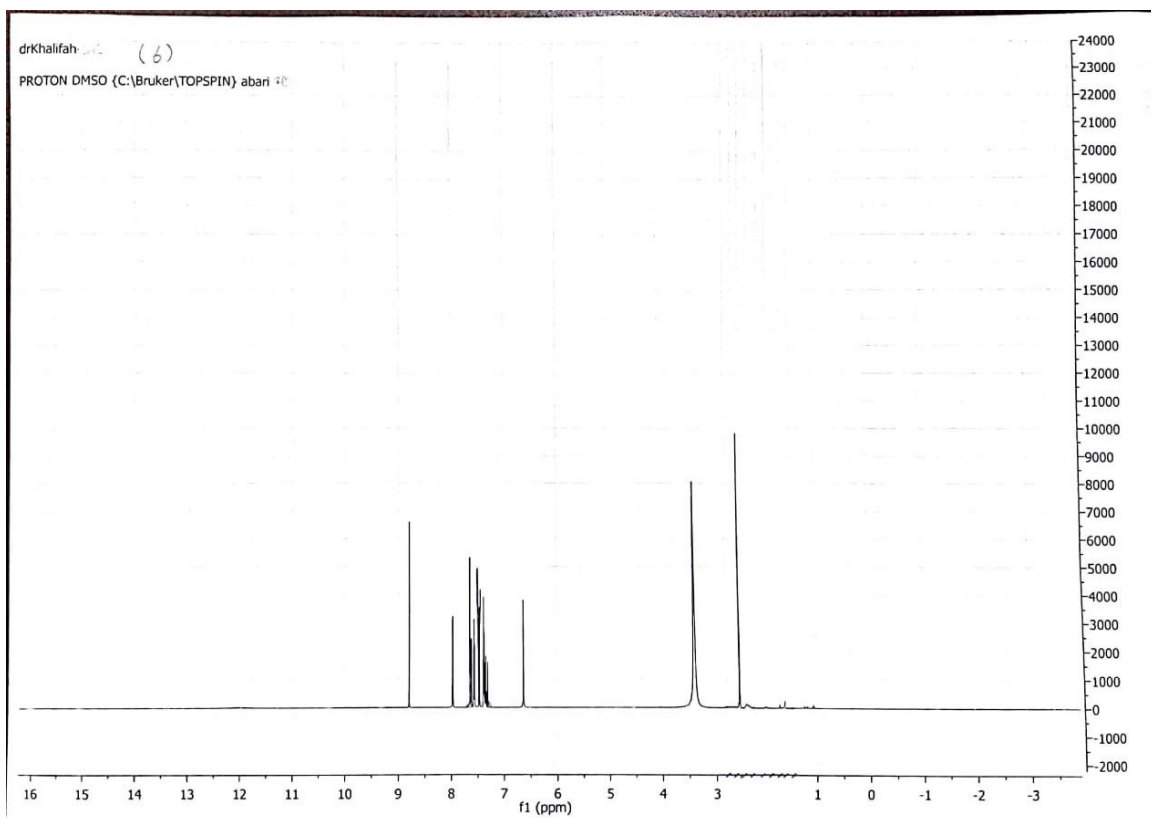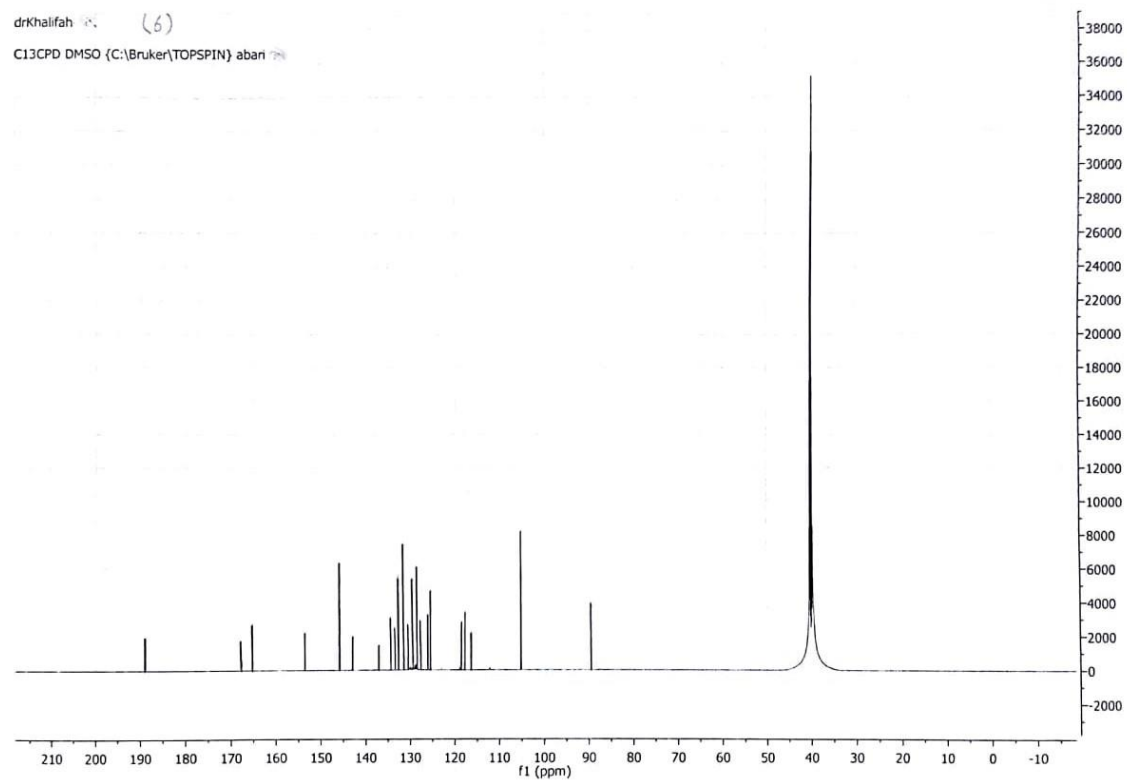

RT: 0.00 - 6.00 SM: 15B

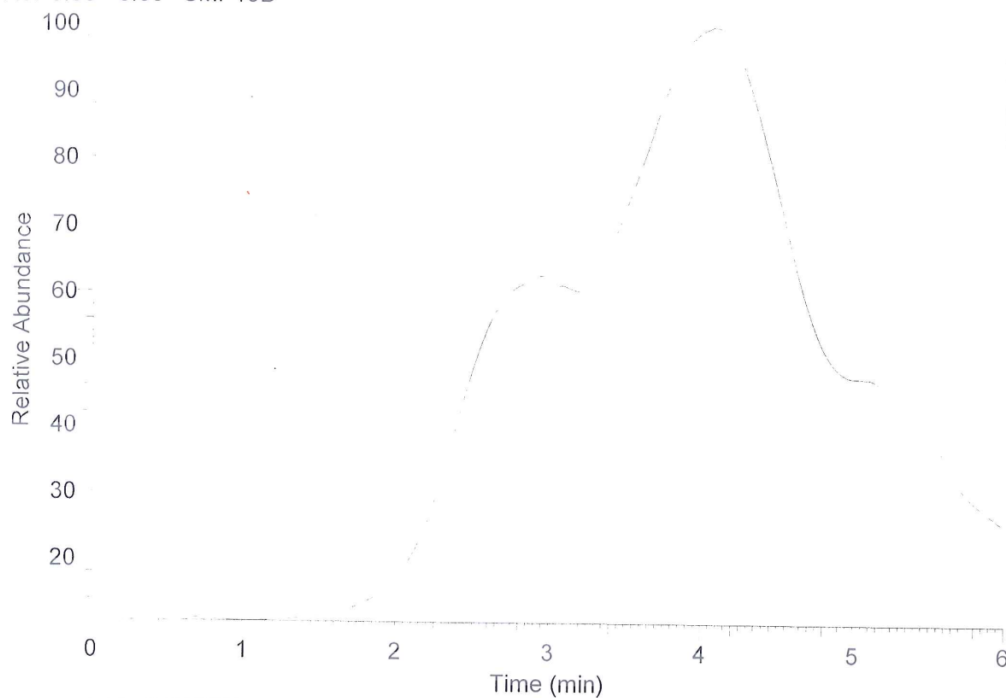

EMAN-SAMIR-G10 #294 RT: 4.94 AV: 1 SB: 2 1.86, 1.84 NL: 1.27E7  
T: {0,0} + c EI Full ms [40.00-1000.00]

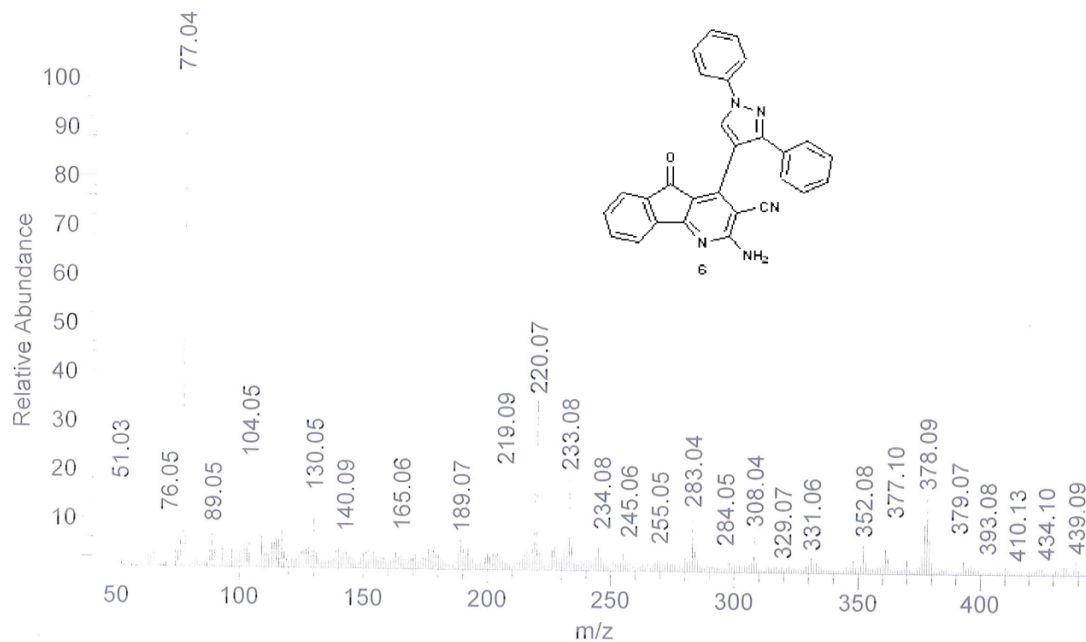

# Peak Find - Memory-98

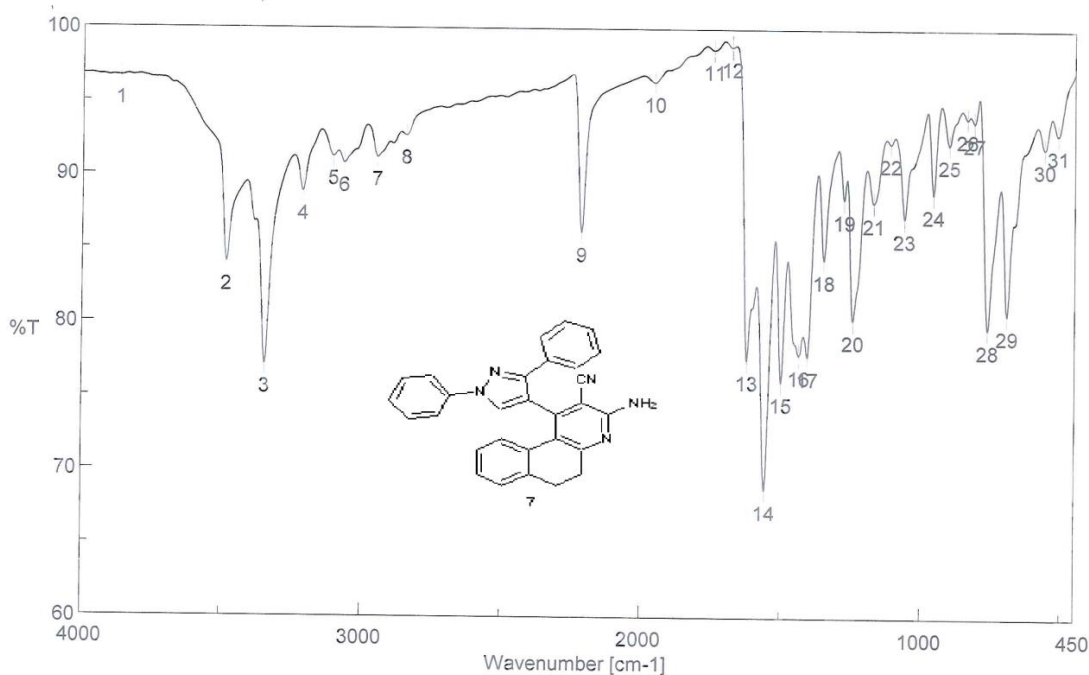

[Comments]  
Sample name G4  
Comment 21/4/2016  
User IR  
Division IR  
Company MAC

## [ Result of Peak Picking ]

| No. | Position | Intensity | No. | Position | Intensity | No. | Position | Intensity |
|-----|----------|-----------|-----|----------|-----------|-----|----------|-----------|
| 1   | 3864.65  | 96.6661   | 2   | 3483.78  | 84.0282   | 3   | 3345.89  | 77.0871   |
| 4   | 3212.83  | 88.8385   | 5   | 3104.83  | 91.2271   | 6   | 3065.3   | 90.7622   |
| 7   | 2946.7   | 91.171    | 8   | 2842.56  | 92.6674   | 9   | 2212.92  | 86.1183   |
| 10  | 1951.61  | 96.3723   | 11  | 1740.44  | 98.5882   | 12  | 1676.8   | 98.7744   |
| 13  | 1620.88  | 77.4644   | 14  | 1557.24  | 68.6535   | 15  | 1499.38  | 75.9925   |
| 16  | 1435.74  | 77.8142   | 17  | 1405.85  | 77.7317   | 18  | 1348     | 84.3082   |
| 19  | 1276.65  | 88.3956   | 20  | 1243.86  | 80.2168   | 21  | 1170.58  | 88.1689   |
| 22  | 1109.83  | 92.2325   | 23  | 1060.66  | 87.1371   | 24  | 956.52   | 88.7874   |
| 25  | 899.63   | 92.1635   | 26  | 835.026  | 93.9671   | 27  | 809.956  | 93.7017   |
| 28  | 760.78   | 79.6361   | 29  | 691.355  | 80.617    | 30  | 558.291  | 91.9191   |
| 31  | 511.044  | 92.882    |     |          |           |     |          |           |

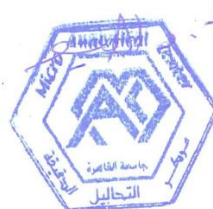

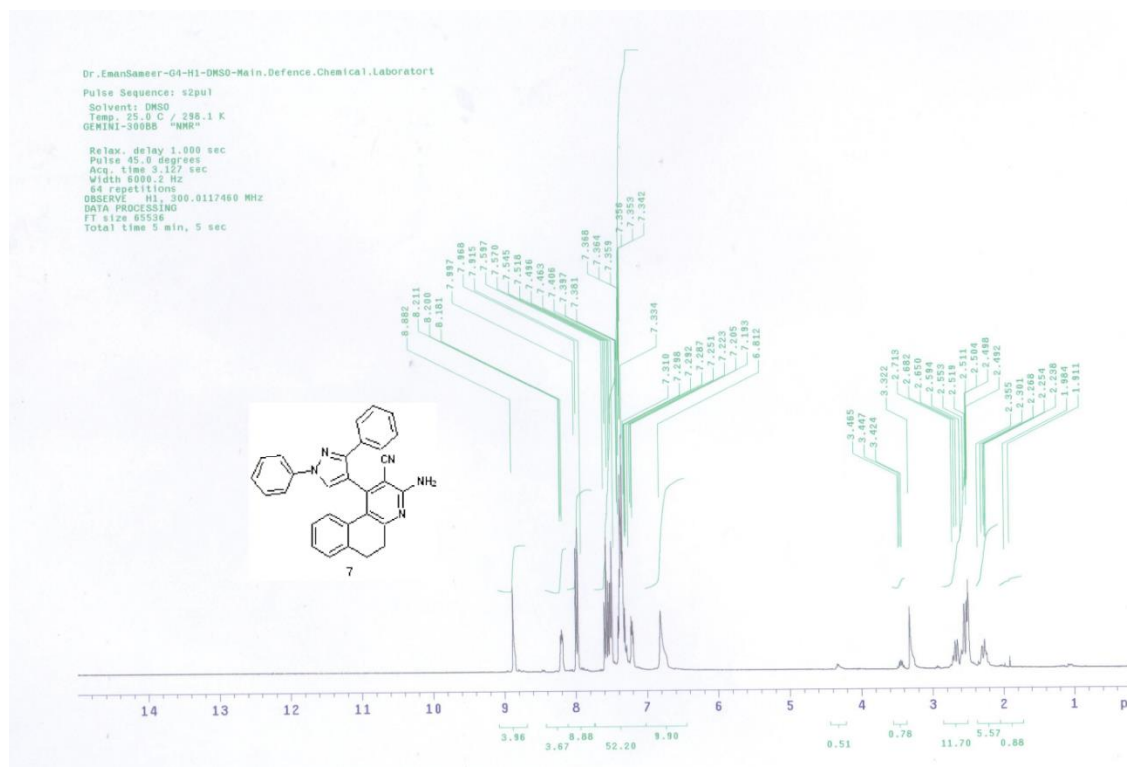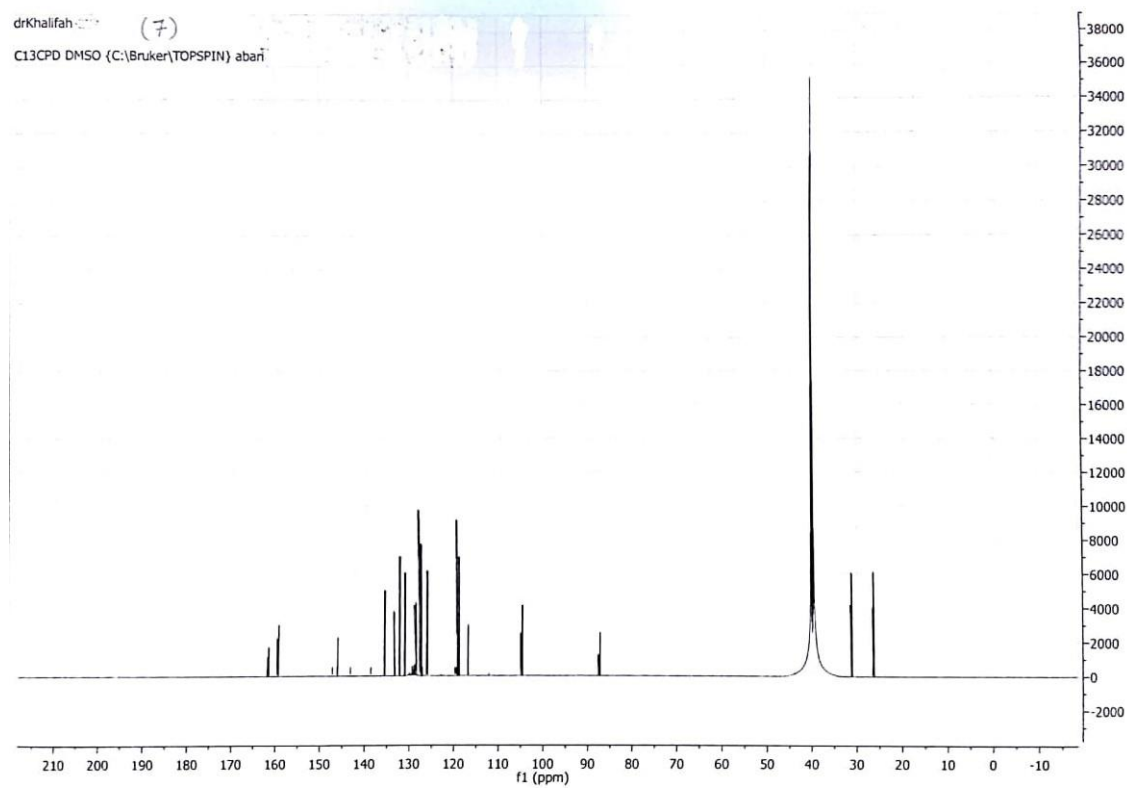

RT: 0.00 - 6.00 SM: 15B

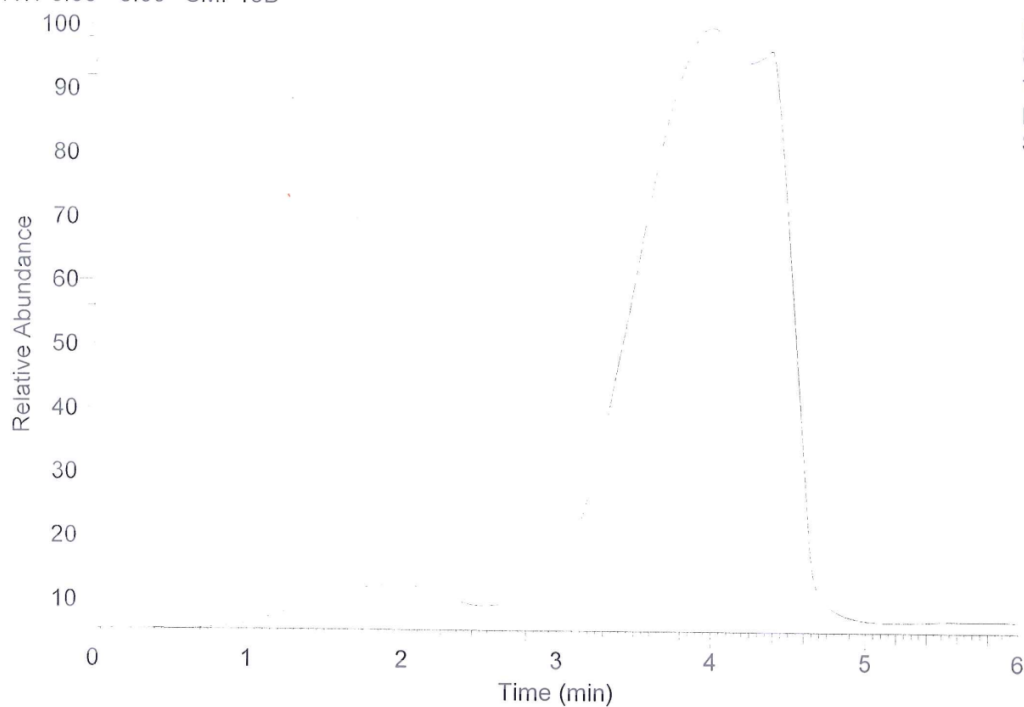

NL:  
8.11E8  
TIC MS  
EMAN-  
SAMIR-G4

EMAN-SAMIR-G4 #270 RT: 4.54 AV: 1 NL: 2.23E7

T: {0,0} + c EI Full ms [40.00-1000.00]

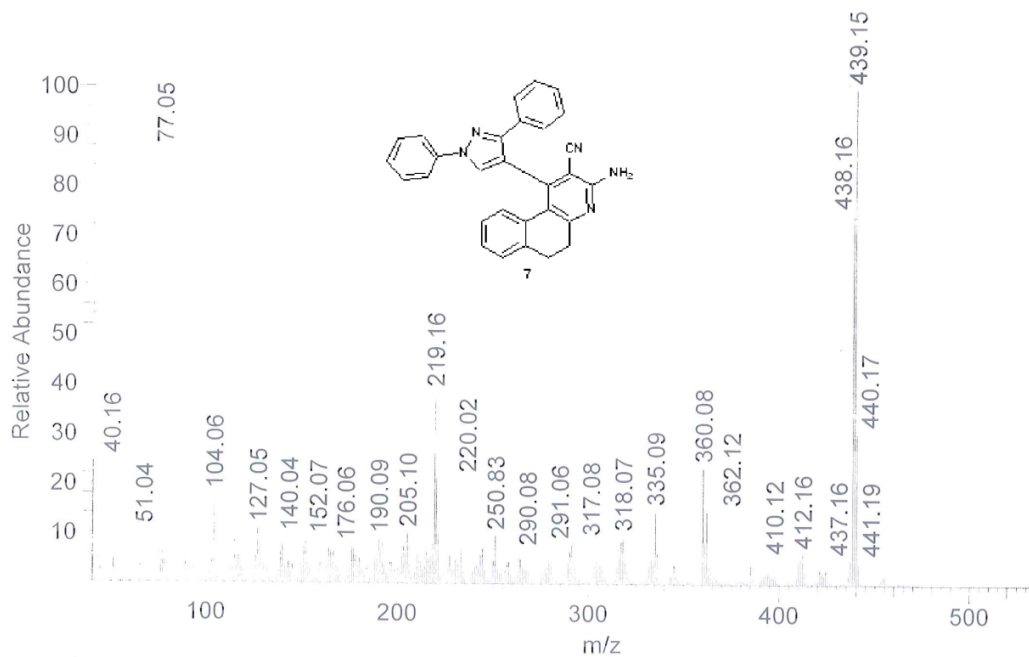



# Peak Find - Memory-102

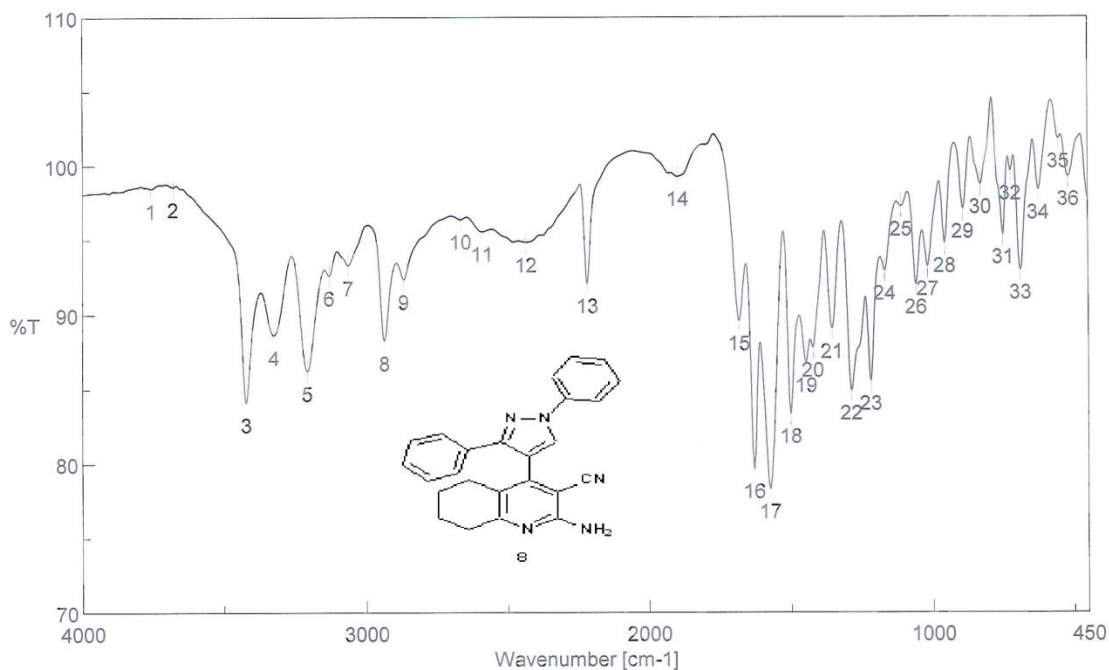

[Comments]  
Sample name G7  
Comment 21/4/2016  
User IR  
Division IR  
Company MAC

## [ Result of Peak Picking ]

| No. | Position | Intensity | No. | Position | Intensity | No. | Position | Intensity |
|-----|----------|-----------|-----|----------|-----------|-----|----------|-----------|
| 1   | 3757.62  | 98.4505   | 2   | 3678.55  | 98.5578   | 3   | 3423.03  | 84.1216   |
| 4   | 3325.64  | 88.6178   | 5   | 3208     | 86.2213   | 6   | 3130.87  | 92.6135   |
| 7   | 3063.37  | 93.287    | 8   | 2935.13  | 88.2266   | 9   | 2866.67  | 92.3558   |
| 10  | 2665.14  | 96.3623   | 11  | 2588.97  | 95.5373   | 12  | 2433.73  | 94.8338   |
| 13  | 2216.77  | 92.0893   | 14  | 1896.65  | 99.2388   | 15  | 1682.59  | 89.5624   |
| 16  | 1629.55  | 79.6279   | 17  | 1574.59  | 78.2739   | 18  | 1501.31  | 83.3392   |
| 19  | 1447.31  | 86.7582   | 20  | 1423.21  | 87.7842   | 21  | 1355.71  | 89.0326   |
| 22  | 1287.25  | 84.9004   | 23  | 1218.79  | 85.5534   | 24  | 1169.62  | 92.9238   |
| 25  | 1110.8   | 97.2065   | 26  | 1058.73  | 92.016    | 27  | 1017.27  | 93.225    |
| 28  | 956.52   | 94.7747   | 29  | 891.916  | 97.0533   | 30  | 829.241  | 98.7019   |
| 31  | 750.174  | 95.3494   | 32  | 723.175  | 99.5927   | 33  | 688.463  | 92.9855   |
| 34  | 624.823  | 98.3283   | 35  | 553.47   | 101.768   | 36  | 518.758  | 99.2302   |

Handwritten signature in blue ink.

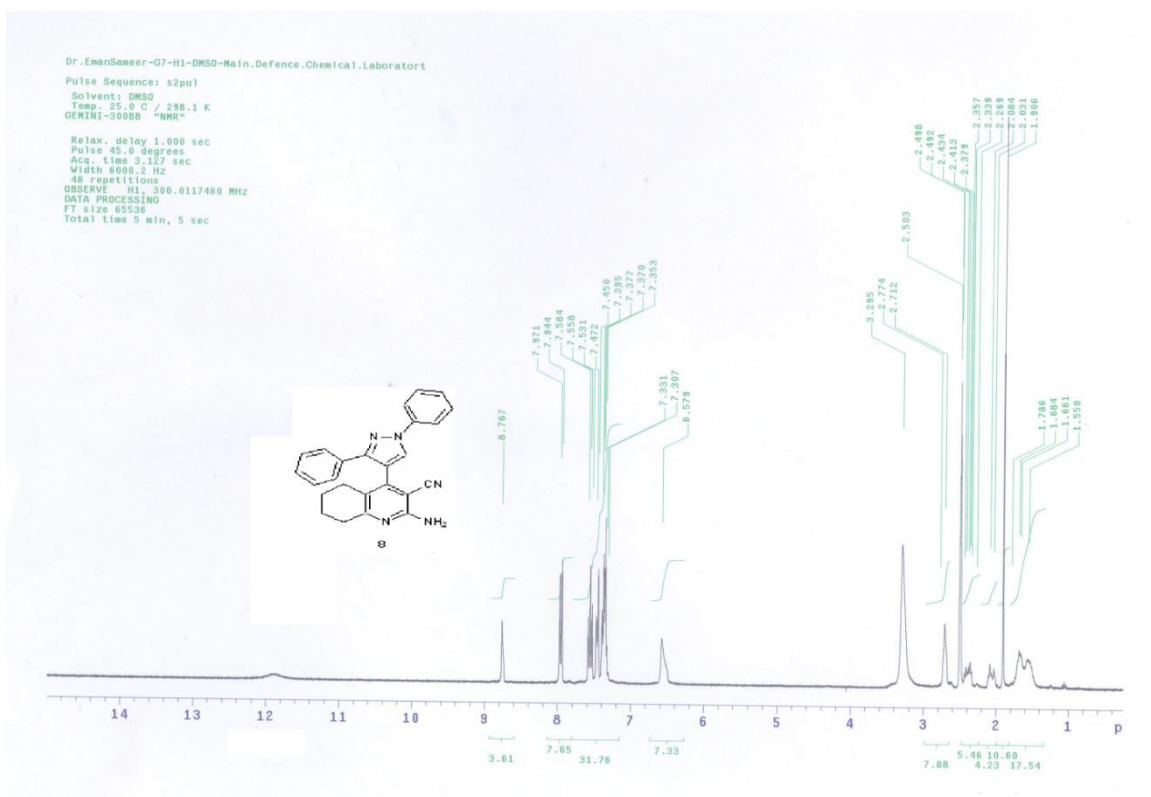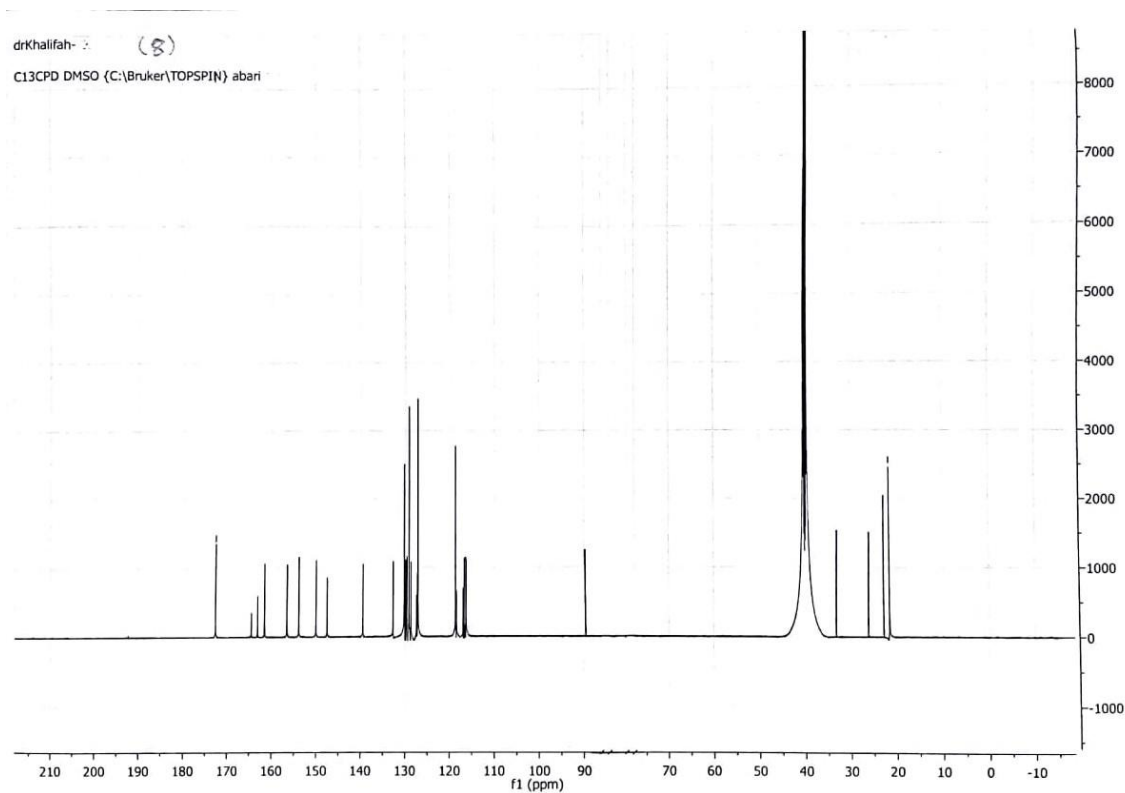

RT: 0.00 - 6.00 SM: 15B

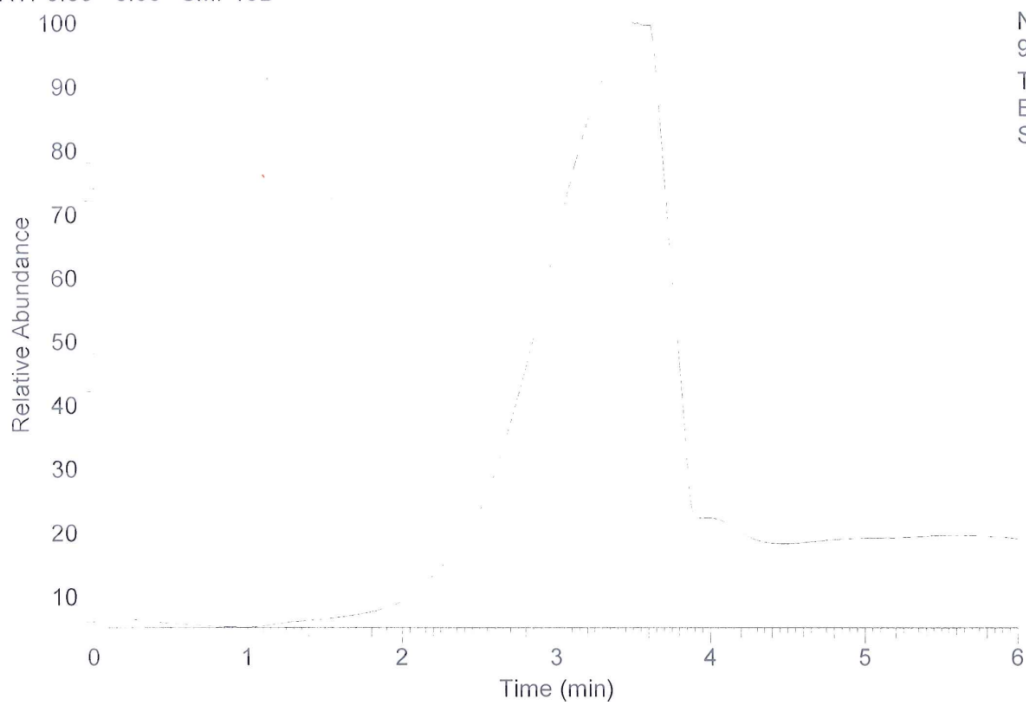

NL:  
9.21E8  
TIC MS  
EMAN-  
SAMIR-G7

EMAN-SAMIR-G7 #211 RT: 3.55 AV: 1 NL: 1.71E8

T: {0,0} + c EI Full ms [40.00-1000.00]

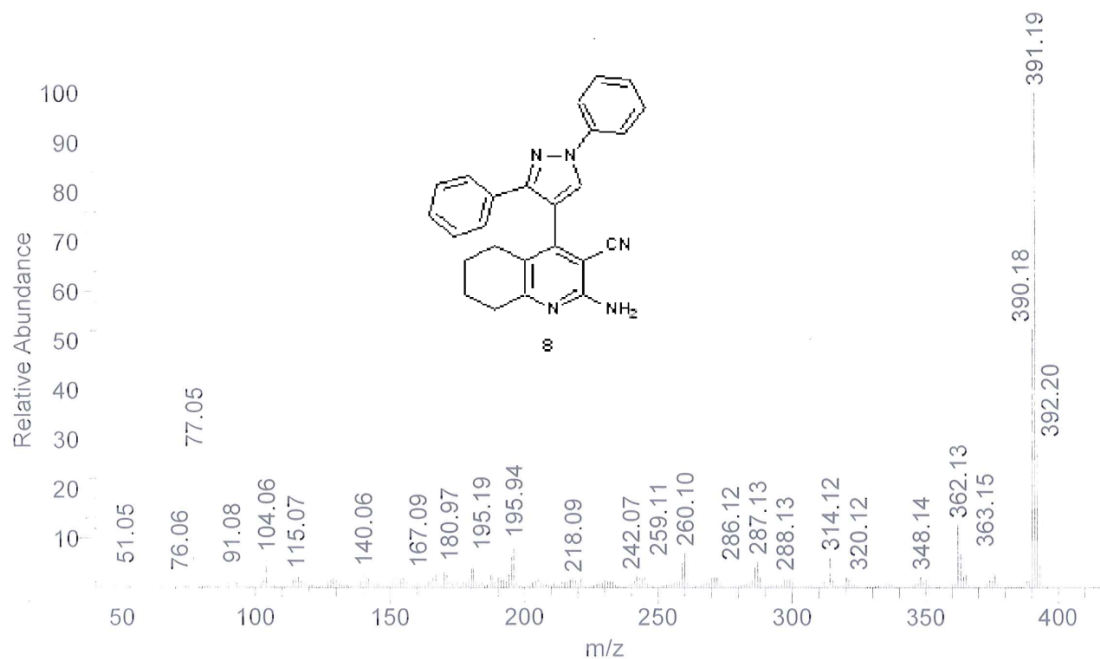

# Peak Find - Memory-141

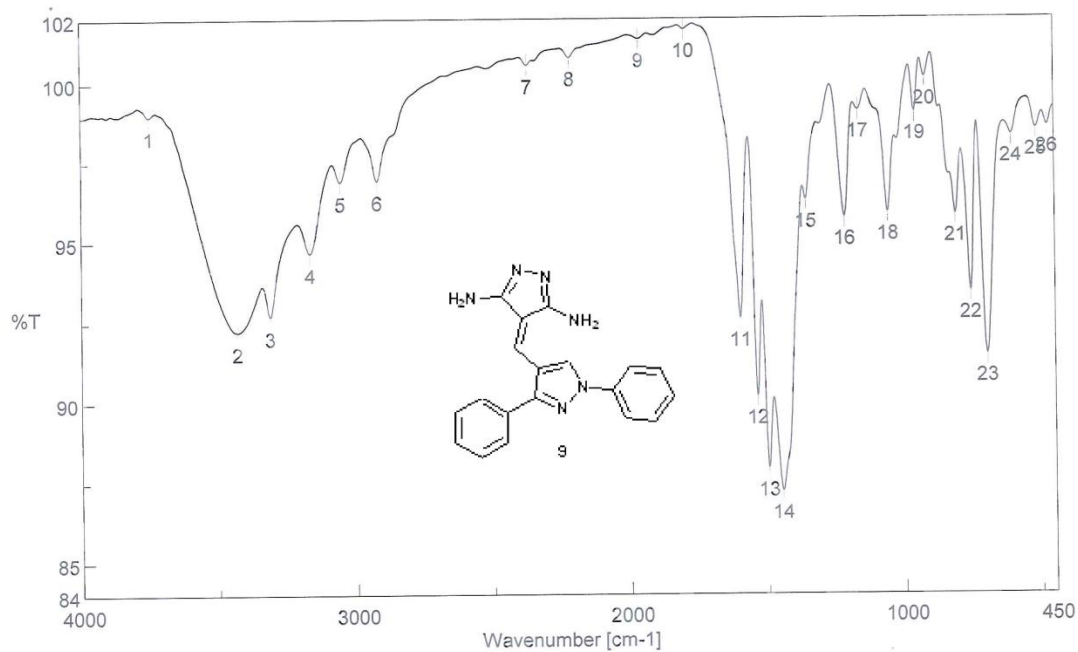

[Comments]  
Sample name G1  
Comment 21/4/2016  
User IR  
Division IR  
Company MAC

## [ Result of Peak Picking ]

| No. | Position | Intensity | No. | Position | Intensity | No. | Position | Intensity |
|-----|----------|-----------|-----|----------|-----------|-----|----------|-----------|
| 1   | 3750.87  | 98.9651   | 2   | 3431.71  | 92.2306   | 3   | 3313.11  | 92.7043   |
| 4   | 3167.51  | 94.6648   | 5   | 3056.62  | 96.8899   | 6   | 2921.63  | 96.9141   |
| 7   | 2370.09  | 100.549   | 8   | 2213.88  | 100.785   | 9   | 1961.25  | 101.361   |
| 10  | 1796.37  | 101.665   | 11  | 1597.73  | 92.6184   | 12  | 1536.99  | 90.1901   |
| 13  | 1498.42  | 87.9359   | 14  | 1448.28  | 87.2197   | 15  | 1358.6   | 96.2877   |
| 16  | 1216.86  | 95.7459   | 17  | 1165.76  | 99.105    | 18  | 1058.73  | 95.8928   |
| 19  | 958.448  | 99.0415   | 20  | 920.843  | 100.129   | 21  | 810.92   | 95.8327   |
| 22  | 756.923  | 93.4397   | 23  | 697.141  | 91.4827   | 24  | 605.539  | 98.309    |
| 25  | 515.865  | 98.503    | 26  | 475.367  | 98.5915   |     |          |           |

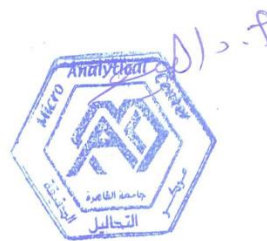

drKhalifah-9 (9)

PROTON DMSO (C:\Bruker\TOPSPIN) abari

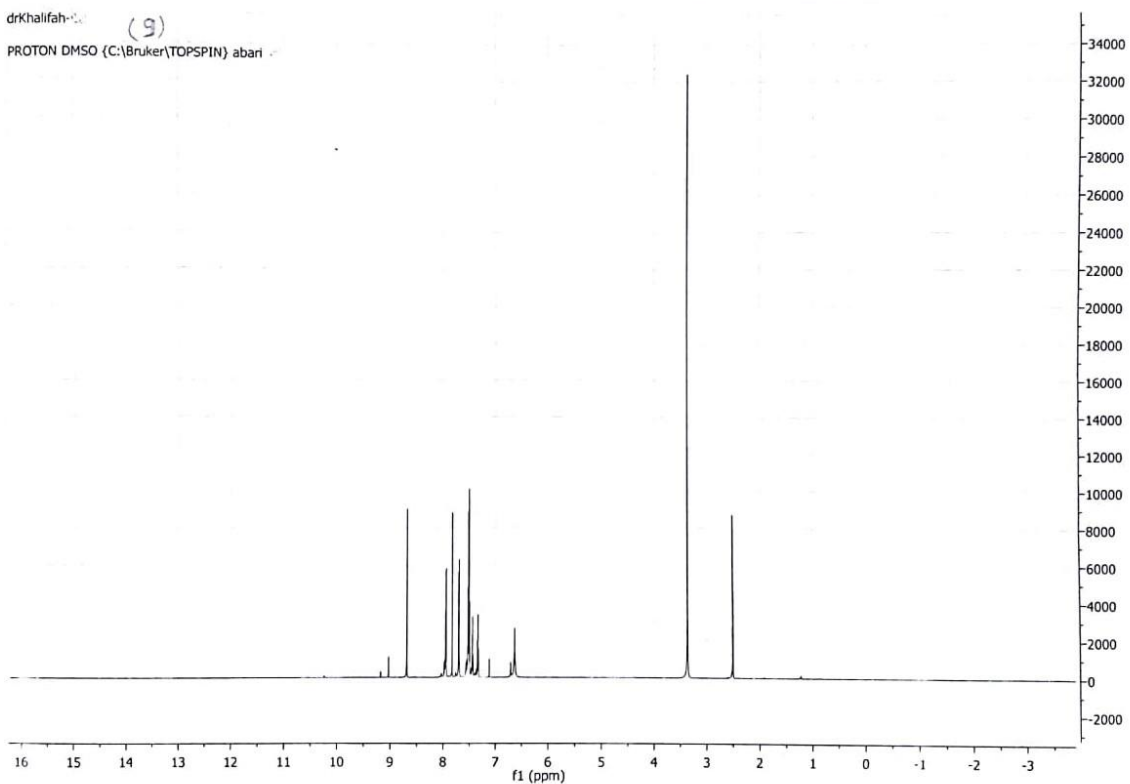

drKhalifah-9 (9)

C13CPD DMSO (C:\Bruker\TOPSPIN) abari

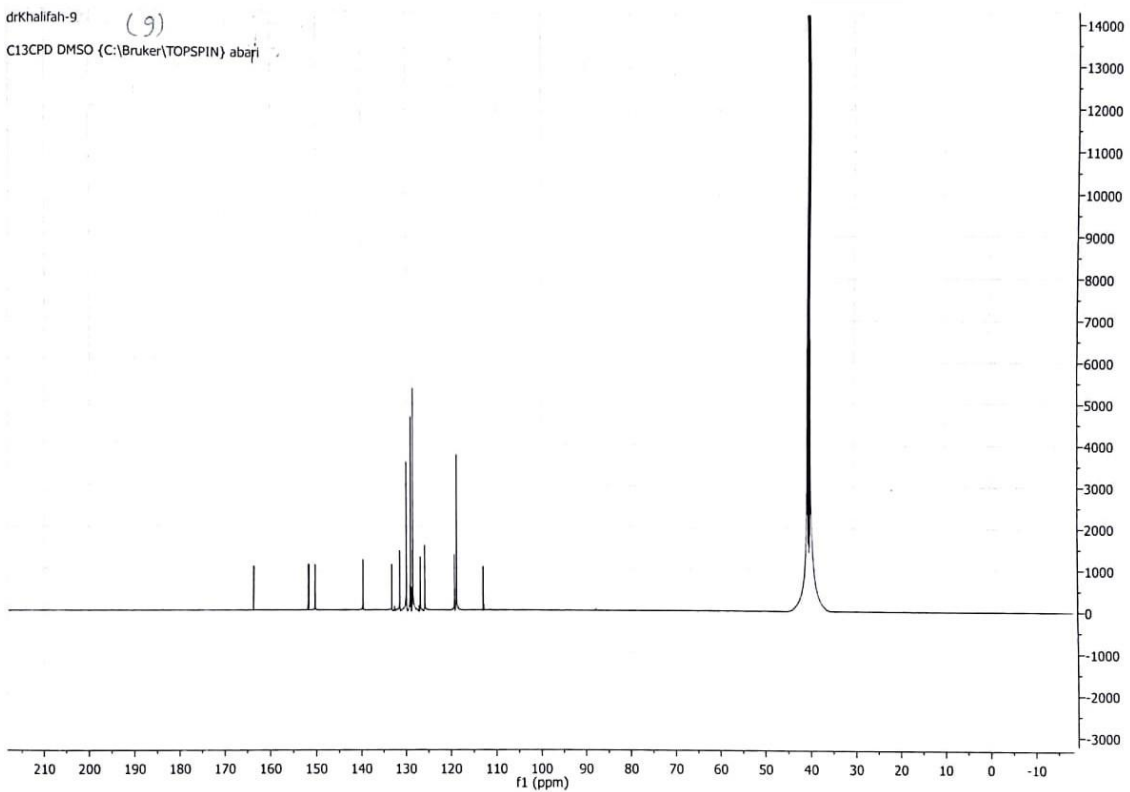

RT: 0.00 - 6.00 SM: 15B

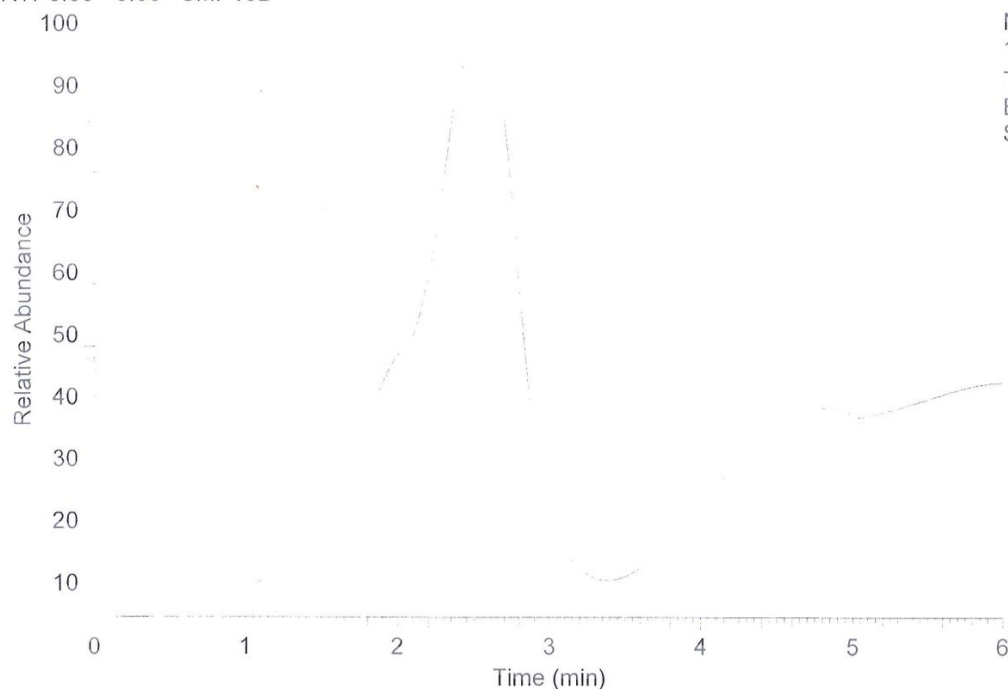

NL:  
1.38E9  
TIC MS  
EMAN-  
SAMIR-G1

EMAN-SAMIR-G1 #326 RT: 5.47 AV: 1 SB: 2 5.44 , 5.44 NL: 1.45E6

T: {0,0} + c EI Full ms [40.00-1000.00]

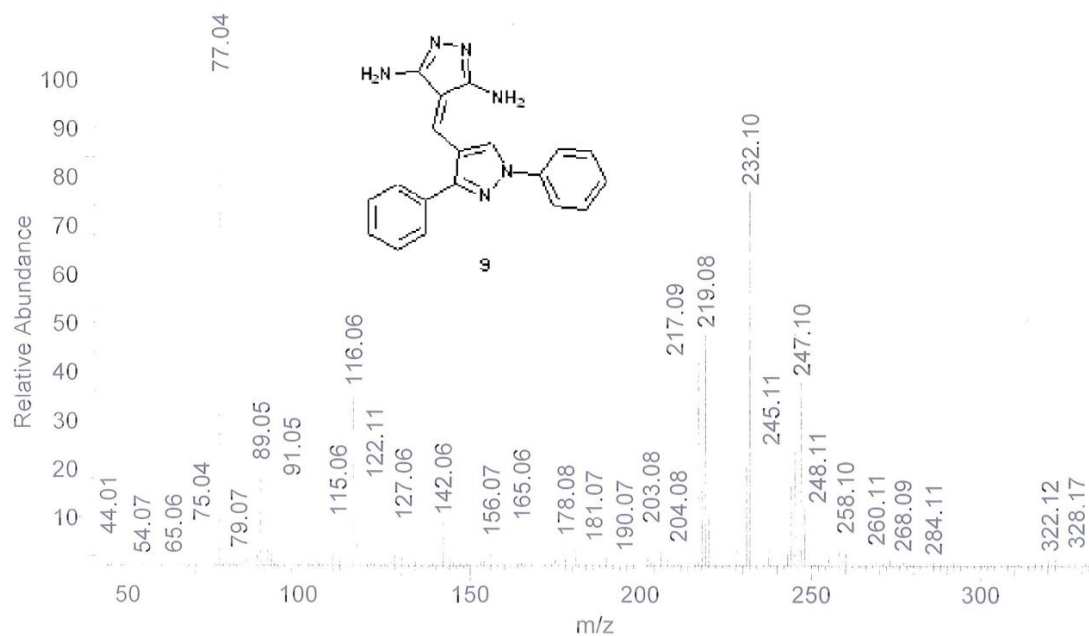

drKhalifah-10 (10)

PROTON DMSO (C:\Bruker\TOPSPIN) abari

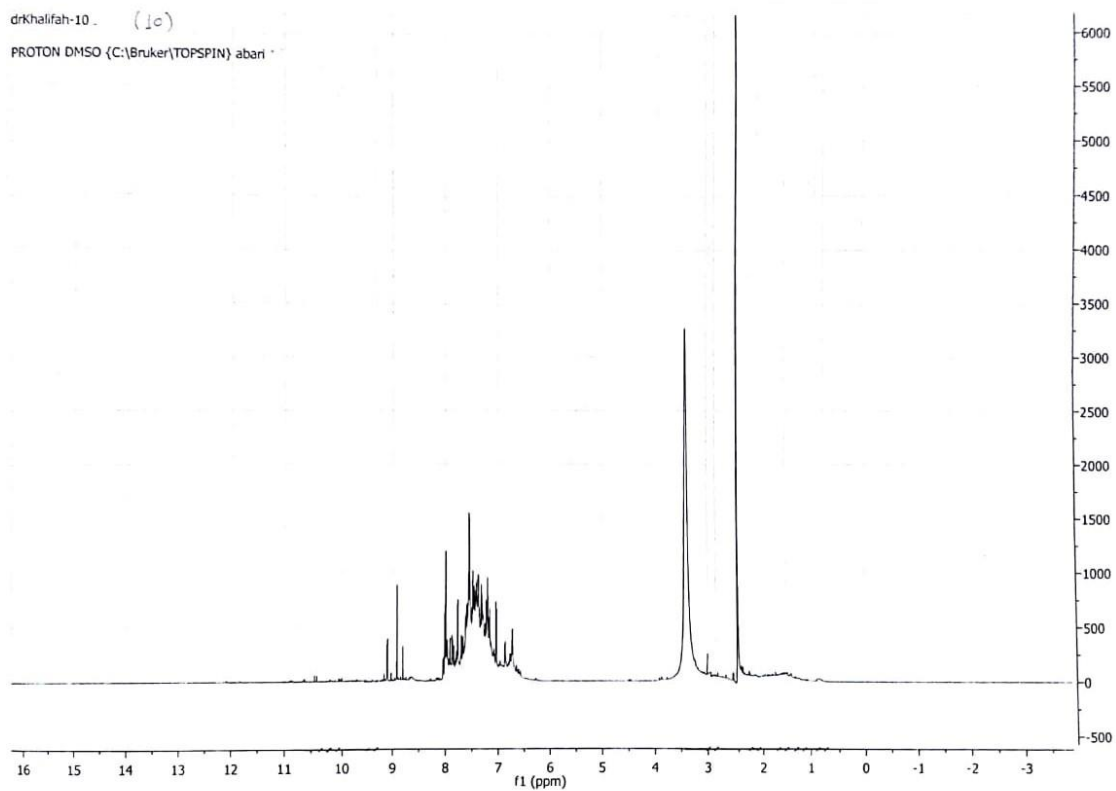

drKhalifah-10 (10)

C13CPD DMSO (C:\Bruker\TOPSPIN) abari

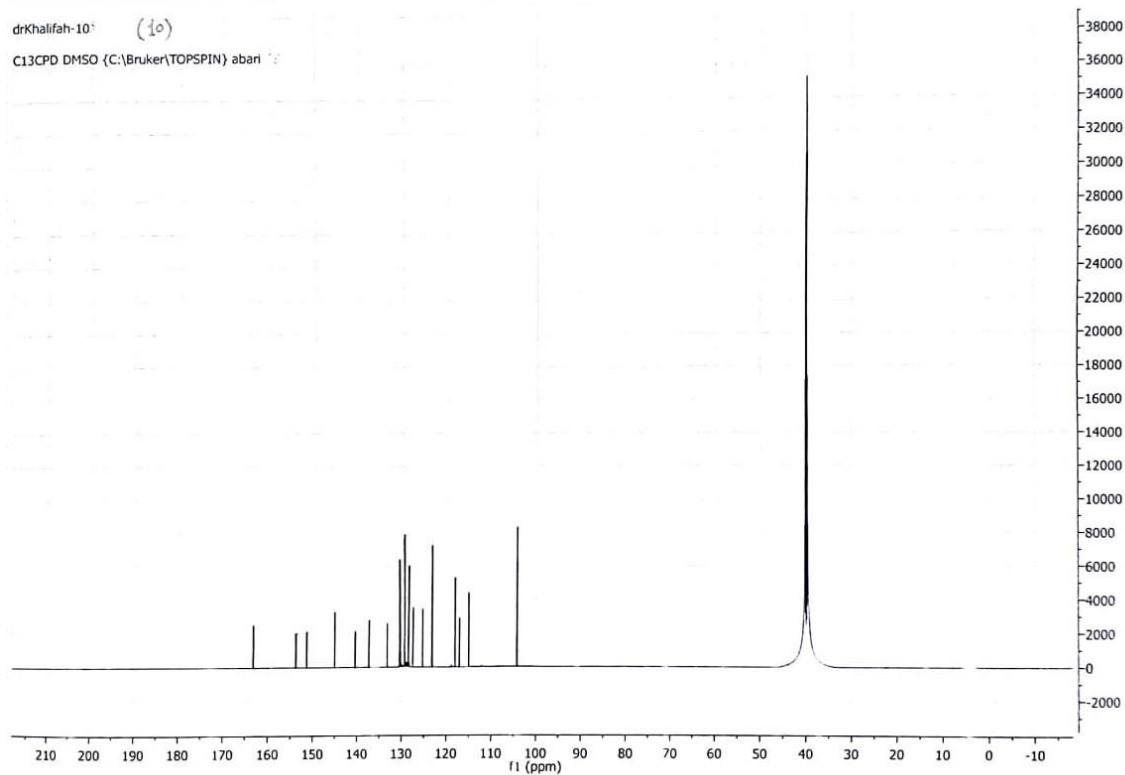

# Peak Find - Memory-149

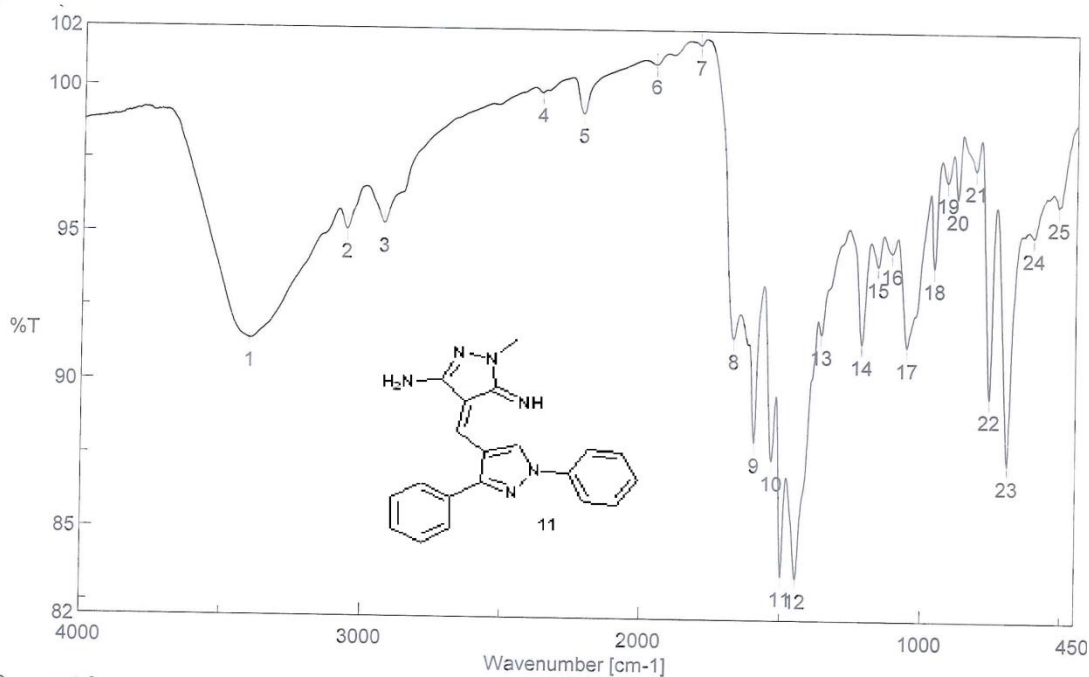

[Comments]  
Sample name G11  
Comment 21/4/2016  
User IR  
Division IR  
Company MAC

## [ Result of Peak Picking ]

| No. | Position | Intensity | No. | Position | Intensity | No. | Position | Intensity |
|-----|----------|-----------|-----|----------|-----------|-----|----------|-----------|
| 1   | 3401.82  | 91.3924   | 2   | 3058.55  | 95.1081   | 3   | 2925.48  | 95.3173   |
| 4   | 2361.41  | 99.8349   | 5   | 2213.88  | 99.1432   | 6   | 1956.43  | 100.842   |
| 7   | 1798.3   | 101.511   | 8   | 1671.02  | 91.5335   | 9   | 1596.77  | 88.0316   |
| 10  | 1534.1   | 87.4182   | 11  | 1498.42  | 83.4907   | 12  | 1447.31  | 83.4253   |
| 13  | 1359.57  | 91.7101   | 14  | 1215.9   | 91.3849   | 15  | 1159.01  | 94.0159   |
| 16  | 1108.87  | 94.4742   | 17  | 1053.91  | 91.2938   | 18  | 957.484  | 93.9936   |
| 19  | 913.129  | 96.9038   | 20  | 876.488  | 96.3404   | 21  | 810.92   | 97.3115   |
| 22  | 757.888  | 89.598    | 23  | 693.284  | 87.3399   | 24  | 601.682  | 95.0513   |
| 25  | 514.901  | 96.109    |     |          |           |     |          |           |

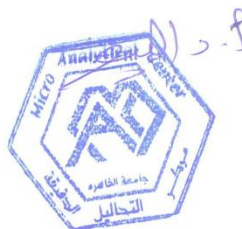



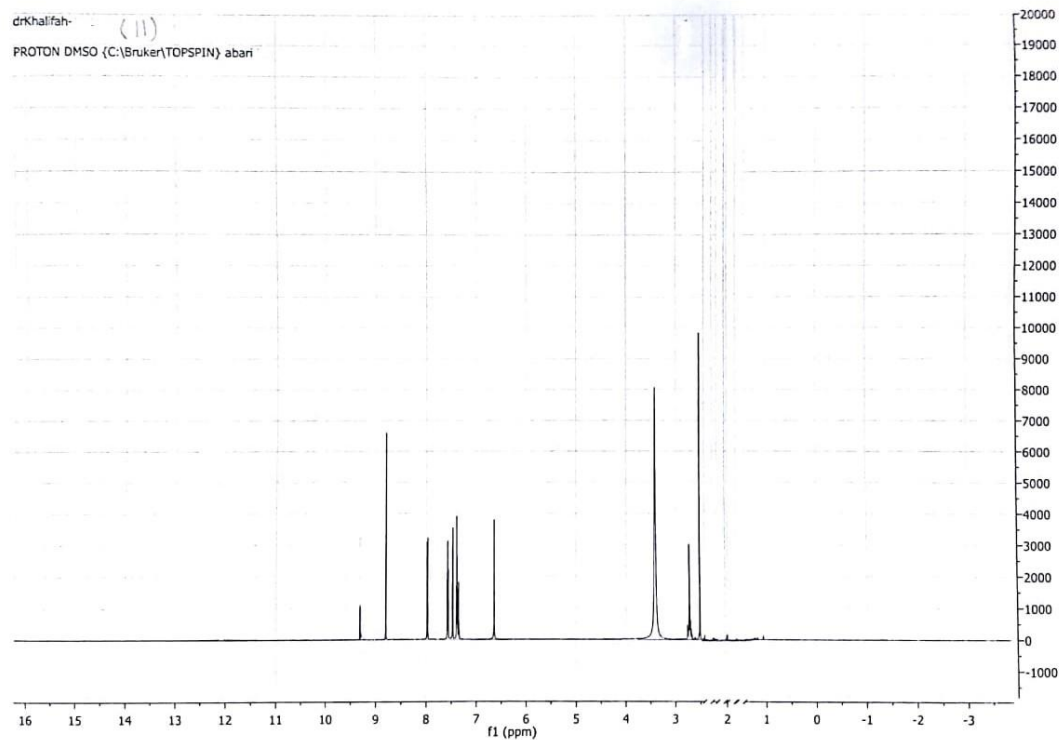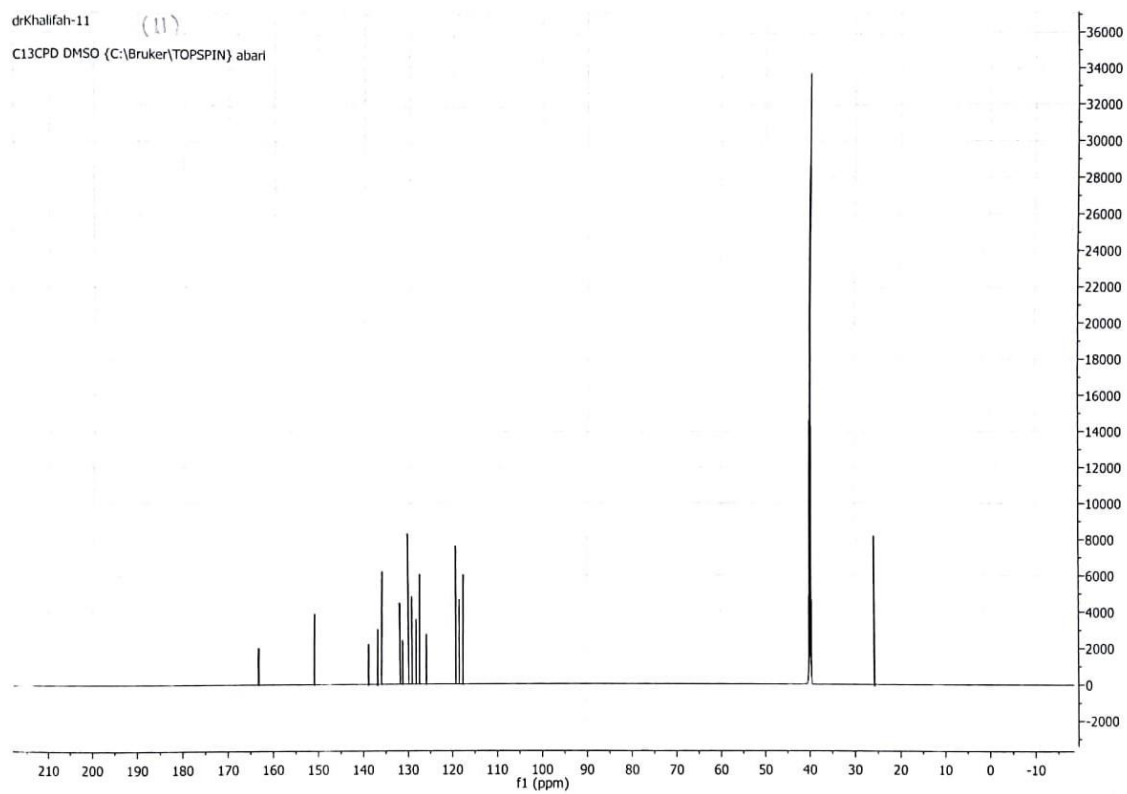

# Peak Find - Memory-136

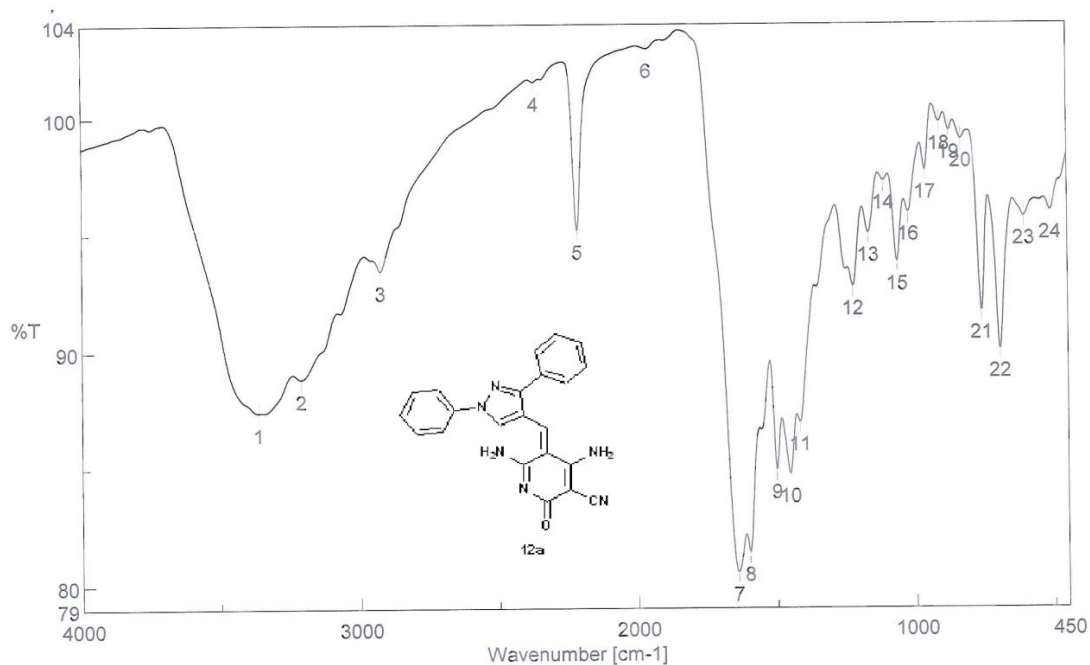

[Comments]  
Sample name G3  
Comment 21/4/2016  
User IR  
Division IR  
Company MAC

## [ Result of Peak Picking ]

| No. | Position | Intensity | No. | Position | Intensity | No. | Position | Intensity |
|-----|----------|-----------|-----|----------|-----------|-----|----------|-----------|
| 1   | 3366.14  | 87.4095   | 2   | 3211.86  | 88.831    | 3   | 2925.48  | 93.426    |
| 4   | 2368.16  | 101.517   | 5   | 2213.88  | 95.151    | 6   | 1959.32  | 102.941   |
| 7   | 1641.13  | 80.526    | 8   | 1599.66  | 81.3683   | 9   | 1501.31  | 84.896    |
| 10  | 1453.1   | 84.7202   | 11  | 1417.42  | 86.9229   | 12  | 1224.58  | 92.7274   |
| 13  | 1167.69  | 94.999    | 14  | 1112.73  | 97.2351   | 15  | 1064.51  | 93.7724   |
| 16  | 1023.05  | 95.8862   | 17  | 961.341  | 97.6838   | 18  | 909.272  | 99.7589   |
| 19  | 874.56   | 99.3832   | 20  | 831.169  | 99.0174   | 21  | 759.816  | 91.6832   |
| 22  | 693.284  | 90.0501   | 23  | 605.539  | 95.6931   | 24  | 511.044  | 95.9461   |

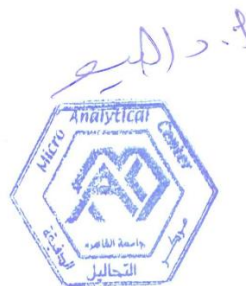

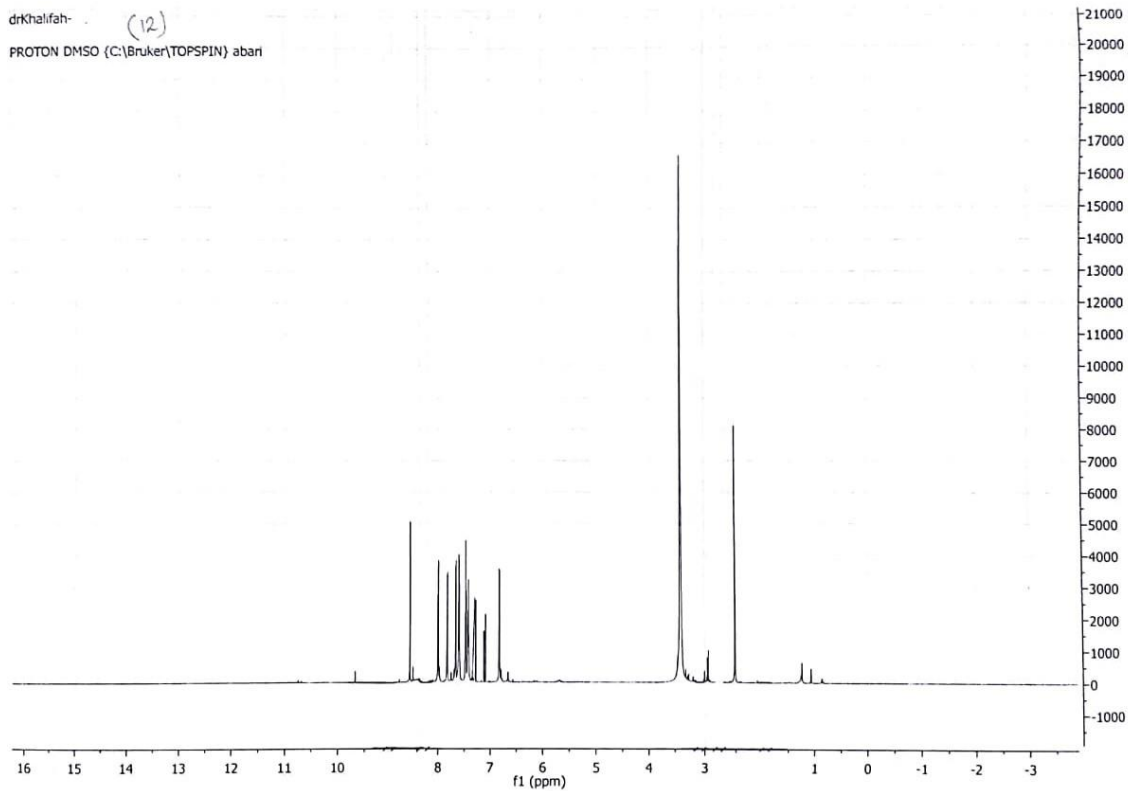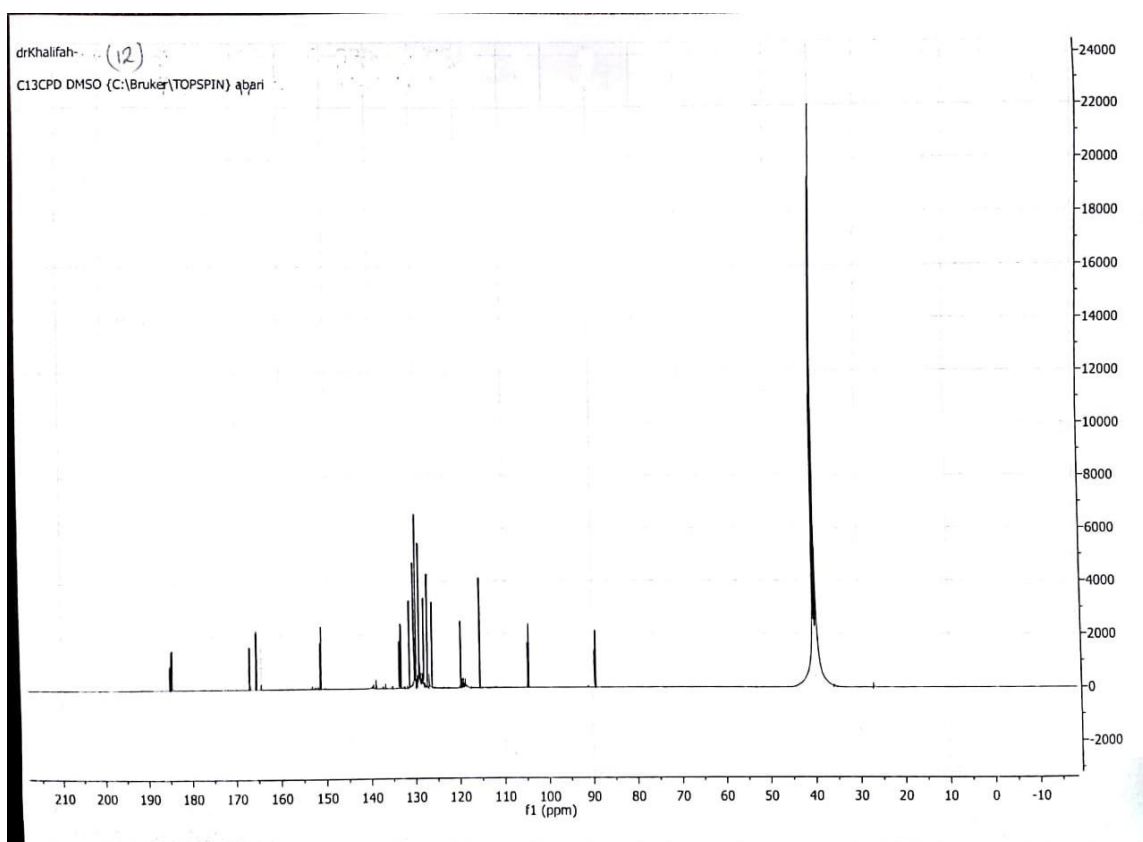

RT: 0.00 - 6.00 SM: 15B

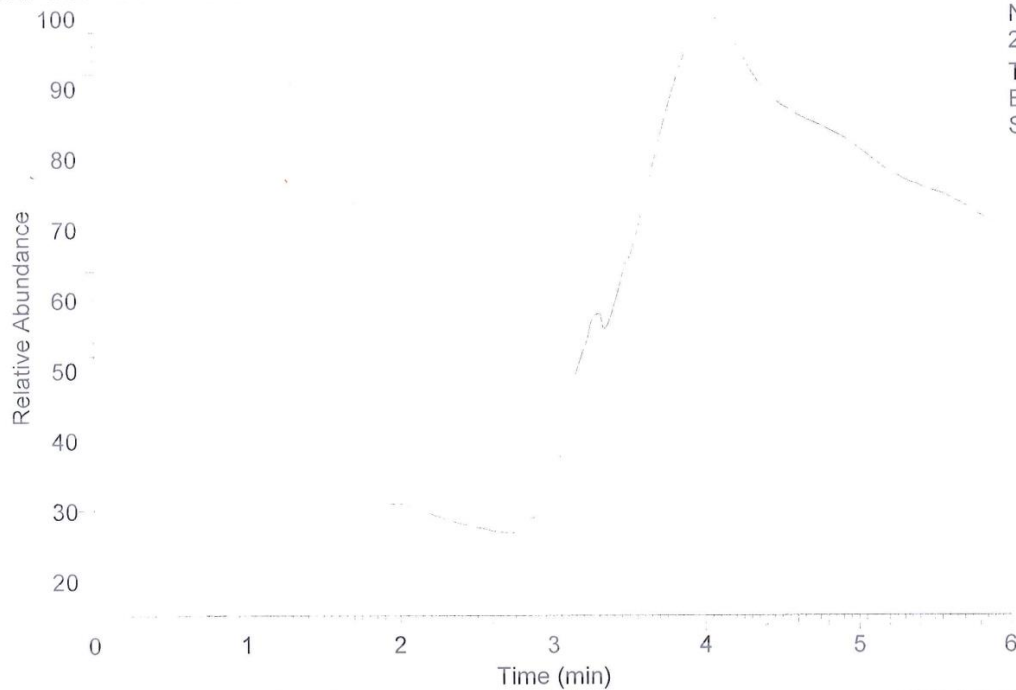

NL:  
2.97E8  
TIC MS  
EMAN-  
SAMIR-G3

EMAN-SAMIR-G3 #336 RT: 5.64 AV: 1 SB: 6 4.85, 4.85-4.92 NL: 1.60E6

T: {0,0} + c EI Full ms [40.00-1000.00]

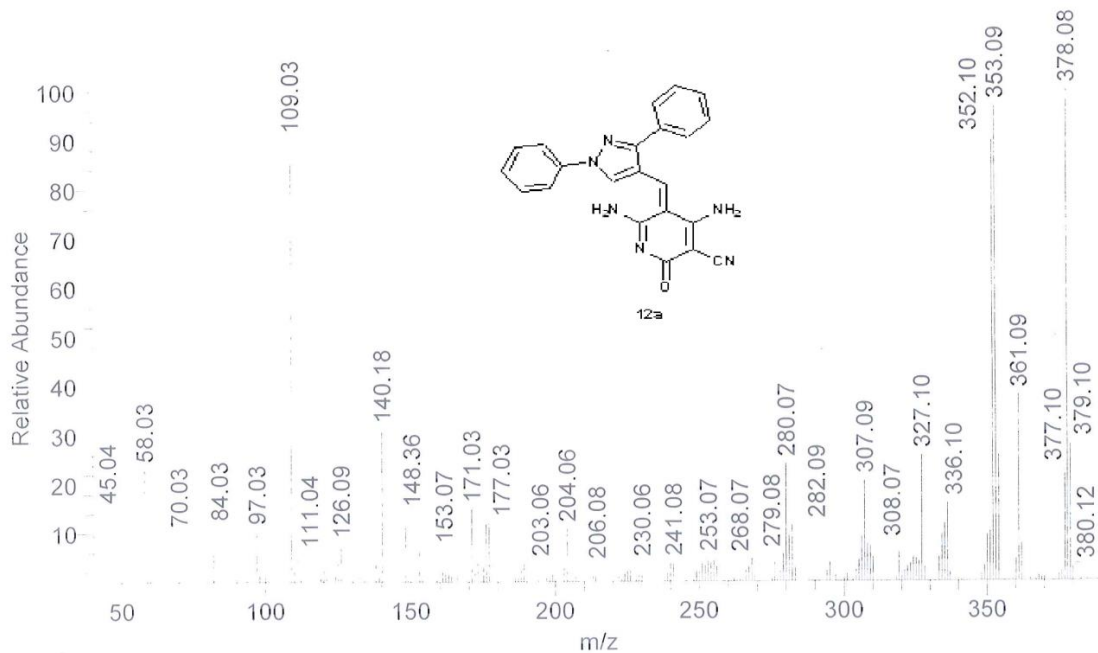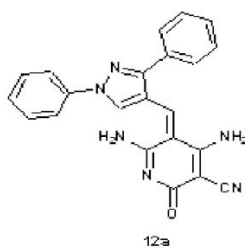

RT: 0.00 - 6.00 SM: 15B

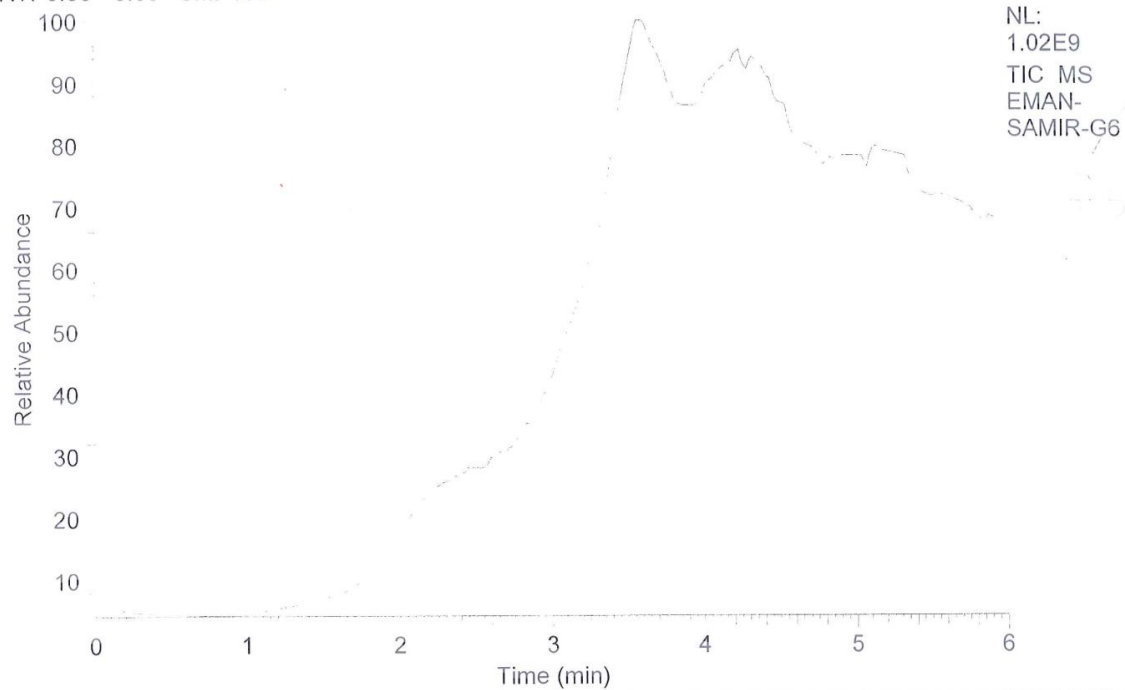

EMAN-SAMIR-G6 #285 RT: 4.79 AV: 1 SB: 2 5.15, 5.15 NL: 8.12E6  
T: {0,0} + c EI Full ms [40.00-1000.00]

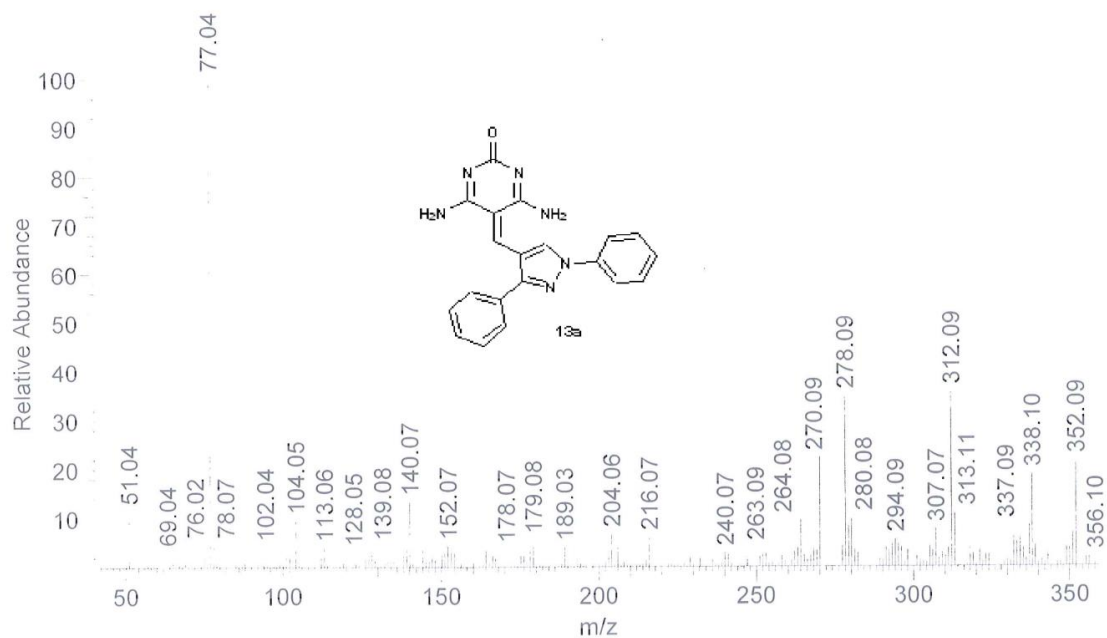

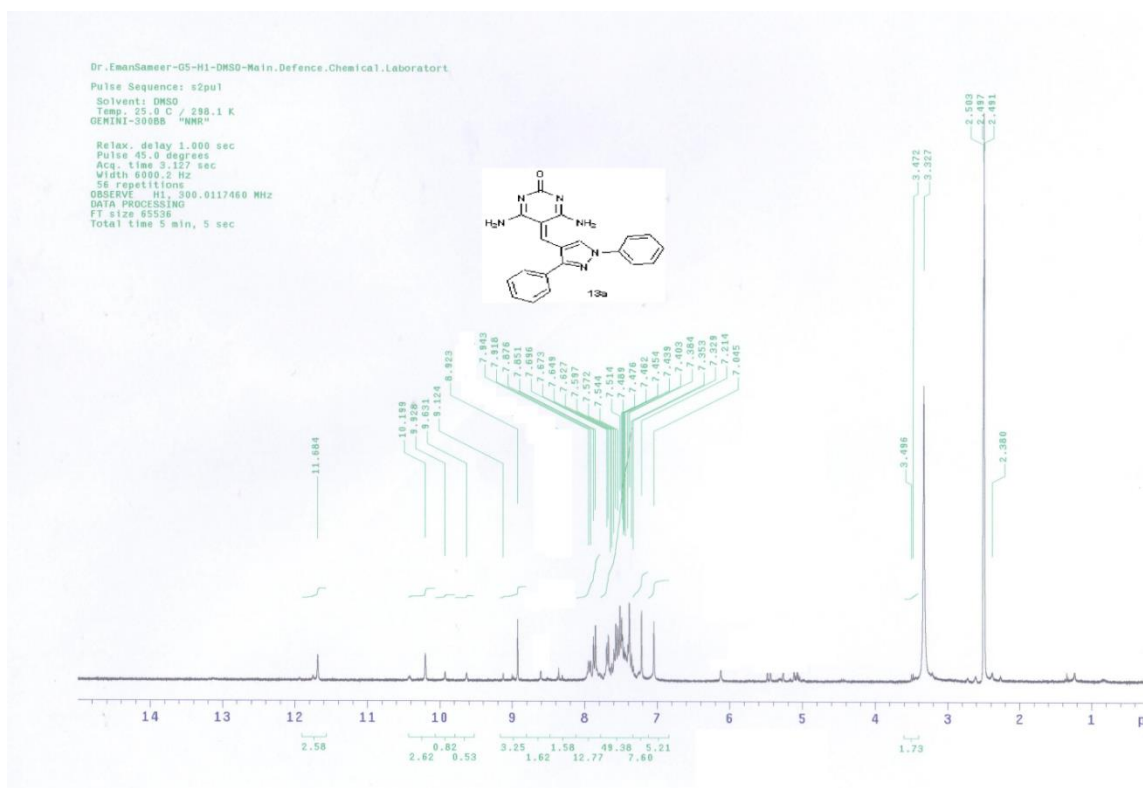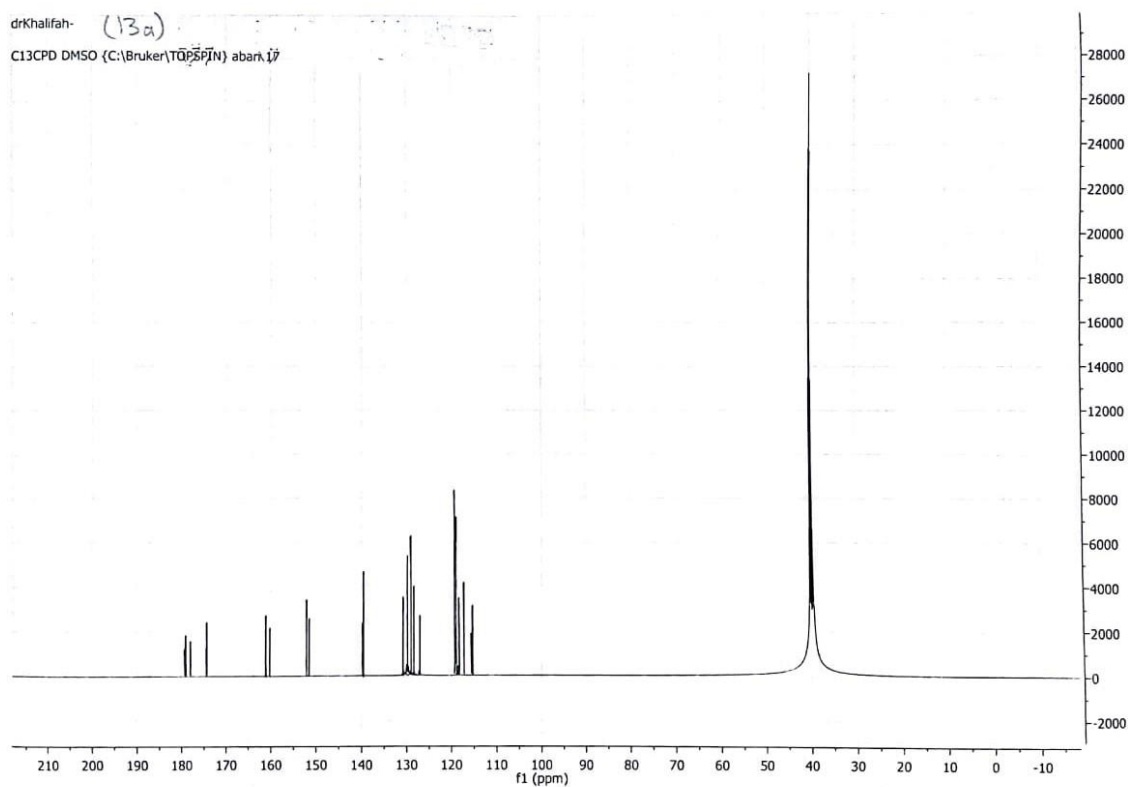

RT: 0.00 - 6.00 SM: 15B



EMAN-SAMIR-G6 #285 RT: 4.79 AV: 1 SB: 2 5.15, 5.15 NL: 8.12E6  
T: {0,0} + c EI Full ms [40.00-1000.00]



# Peak Find - Memory-156

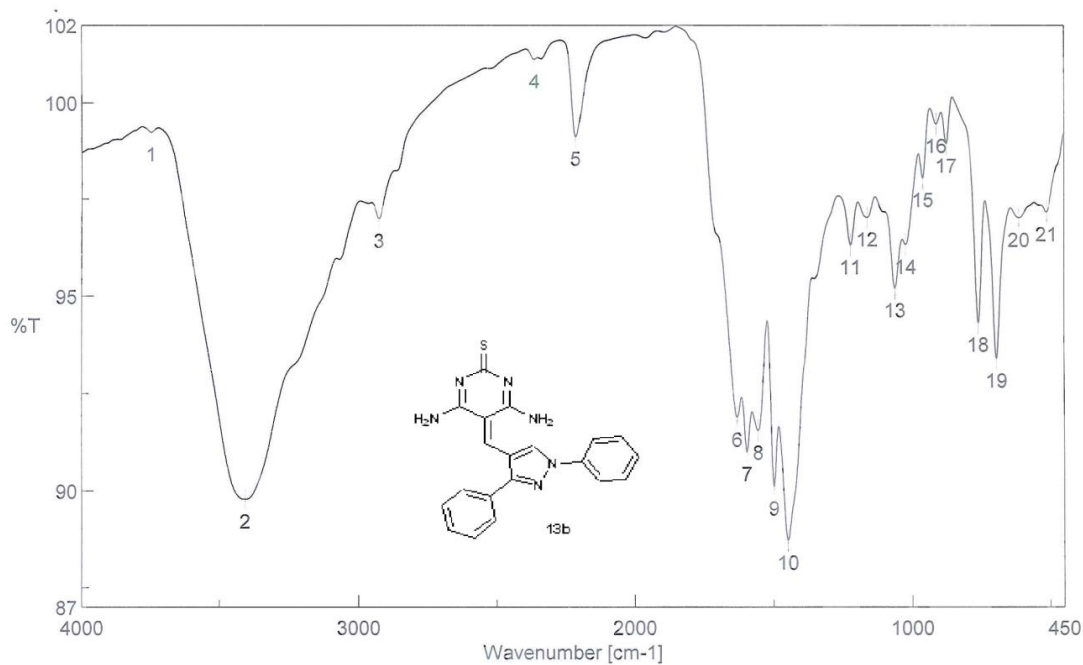

[Comments]  
Sample name G6  
Comment 21/4/2016  
User IR  
Division IR  
Company MAC

## [ Result of Peak Picking ]

| No. | Position | Intensity | No. | Position | Intensity | No. | Position | Intensity |
|-----|----------|-----------|-----|----------|-----------|-----|----------|-----------|
| 1   | 3747.98  | 99.2234   | 2   | 3408.57  | 89.7747   | 3   | 2926.45  | 96.9738   |
| 4   | 2362.37  | 101.114   | 5   | 2212.92  | 99.098    | 6   | 1631.48  | 91.8778   |
| 7   | 1596.77  | 90.9907   | 8   | 1556.27  | 91.54     | 9   | 1499.38  | 90.1032   |
| 10  | 1449.24  | 88.7124   | 11  | 1222.65  | 96.2909   | 12  | 1162.87  | 97.0044   |
| 13  | 1061.62  | 95.1876   | 14  | 1023.05  | 96.3014   | 15  | 961.341  | 98.0277   |
| 16  | 912.165  | 99.4294   | 17  | 875.524  | 98.9146   | 18  | 759.816  | 94.3067   |
| 19  | 694.248  | 93.3935   | 20  | 613.252  | 96.9949   | 21  | 512.972  | 97.1398   |

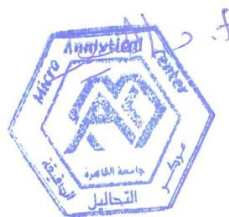



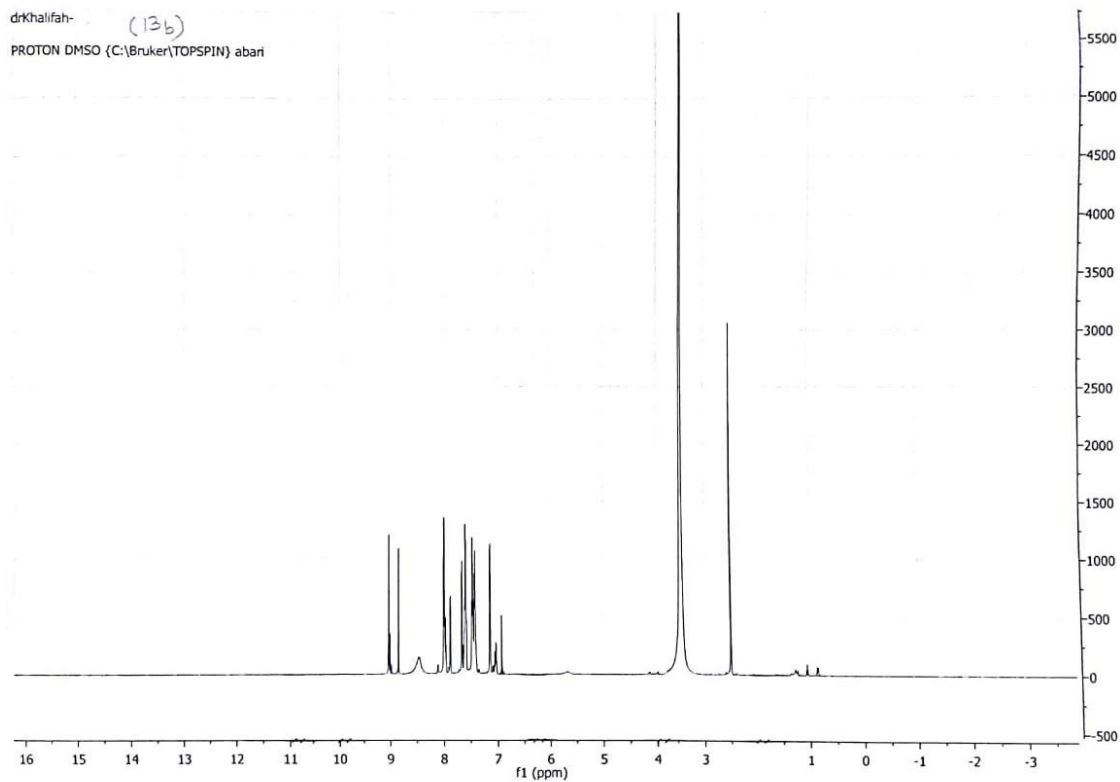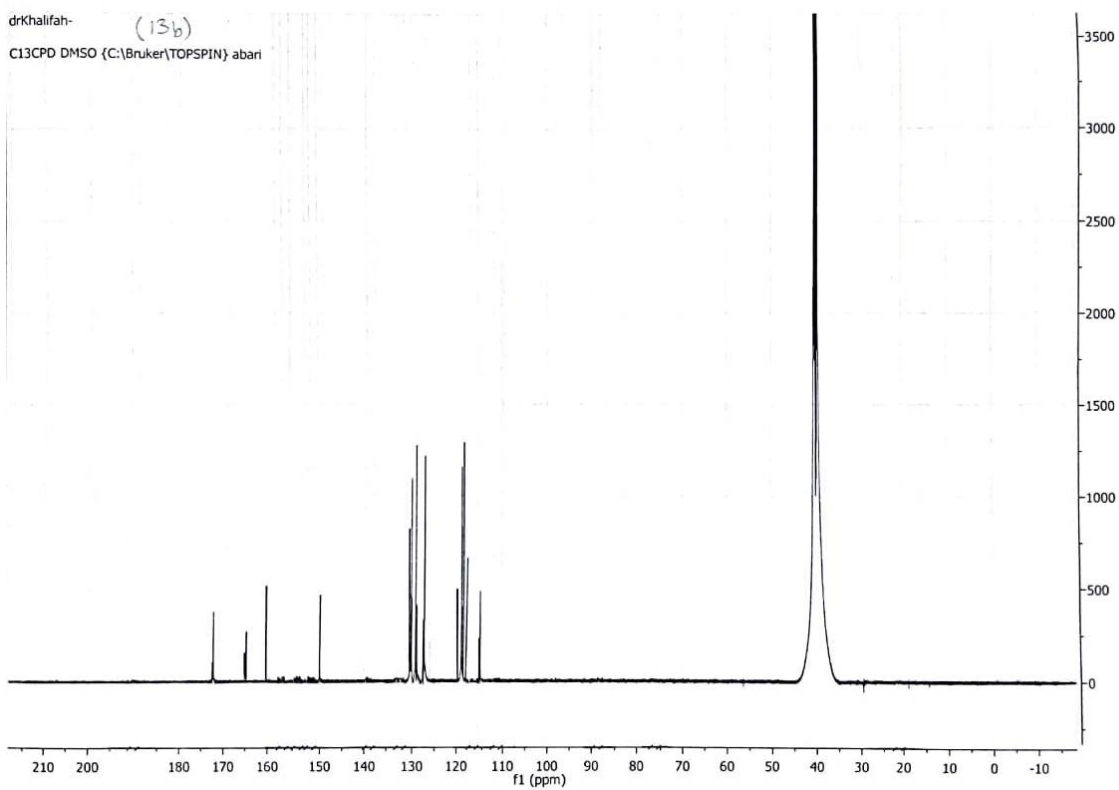

RT: 0.00 - 6.00 SM: 15B

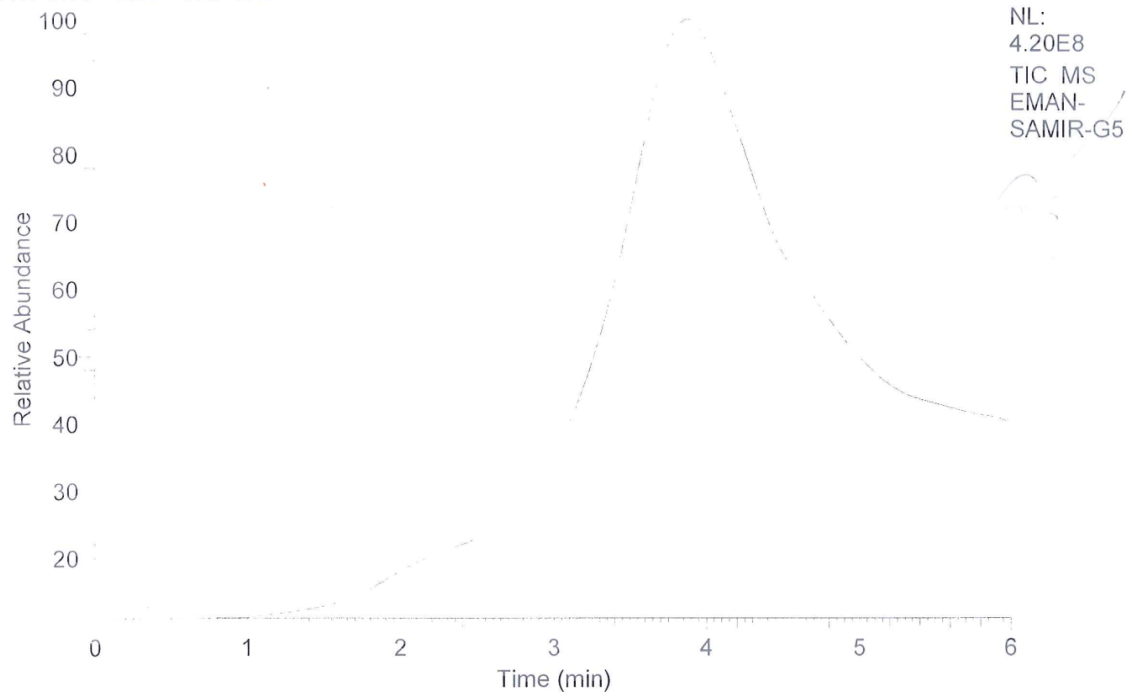

EMAN-SAMIR-G5 #253 RT: 4.25 AV: 1 SB: 6 4.15 , 3.45-3.51 NL: 5.37E6  
T: {0,0} + c EI Full ms [40.00-1000.00]

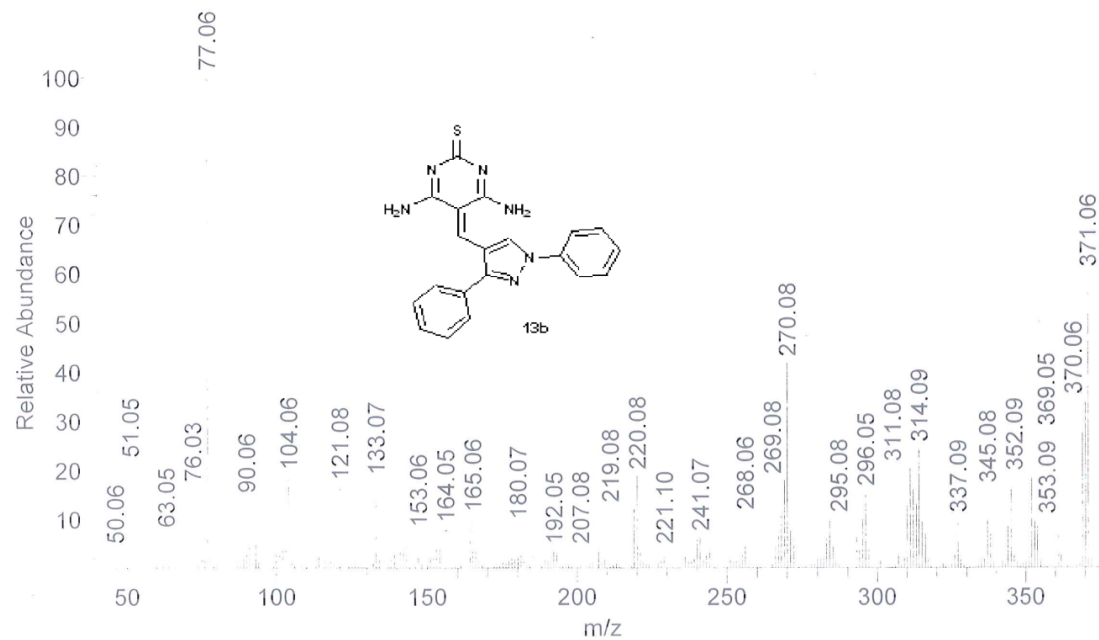

Supplement: s1 [file s1]
